# Supplementary material for: The determinants of democracy: a sensitivity analysis
Source: Springer Nature journal article supplement (doi:10.1007/s11127-019-00742-z), 2019-10-25
Supplement: MOESM1 [file 17321896]

Online appendix for  
“The determinants of democracy: A sensitivity analysis”

Espen Geelmuyden Rød<sup>1</sup>, Carl Henrik Knutsen<sup>2</sup>, and Håvard Hegre<sup>1,3</sup>

<sup>1</sup>Department of Peace and Conflict Research, Uppsala University

<sup>2</sup>Department of Political Science, University of Oslo

<sup>3</sup>Peace Research Institute Oslo

October 10, 2019

## Contents

|                                                                                                        |    |
|--------------------------------------------------------------------------------------------------------|----|
| A Overview of concepts and variables in sensitivity analysis                                           | 2  |
| B Imputation                                                                                           | 7  |
| C Meta analyses                                                                                        | 12 |
| D Fraction of robust indicators by concept                                                             | 14 |
| E Models without GDP pc as a core variable                                                             | 16 |
| F Separating within- and between-effects, GDP pc                                                       | 17 |
| G Models with GDP pc data from Bolt et al. (2018)                                                      | 21 |
| H Most robust determinants when excluding proximate indicators (mass activism)<br>as control variables | 22 |
| I Democratization: results for all indicators, sorted by variable and concept                          | 25 |
| J Democratic stability: results for all indicators, sorted by variable and concept                     | 45 |
| A Overview of concepts and variables in sensitivity analysis                                           |    |

Table A-1: Concept categories and variable names

|                                    | <i>Variable Name</i> | <i>Description</i>                           | <i>Source</i>                                       |                                           |
|------------------------------------|----------------------|----------------------------------------------|-----------------------------------------------------|-------------------------------------------|
| Dependent variable                 | <i>polity_dich</i>   | Democracy                                    | Marshall et al. (2018)                              |                                           |
|                                    | <i>BMR</i>           |                                              | Boix et al. (2012),                                 |                                           |
|                                    | <i>ACLP</i>          |                                              | Cheibub et al. (2010) and Bjørnskov and Rode (2019) |                                           |
|                                    | <i>vdem_dich</i>     |                                              | Coppedge et al. (2019)                              |                                           |
| Core variables                     | <i>lnwdgpppc_c</i>   | GDP pc, log-trans.                           | World Bank (2019)                                   |                                           |
|                                    | <i>l_s-trans</i>     | Time since transition to autocracy/democracy |                                                     |                                           |
|                                    |                      | Democracy lagged                             |                                                     |                                           |
|                                    |                      | GDP pc, log-trans. * Democracy lagged        |                                                     |                                           |
|                                    |                      | Time since transition * Democracy lagged     |                                                     |                                           |
| <i>Concept Label</i>               | <i>Concept No.</i>   | <i>Variable Name</i>                         | <i>Description</i>                                  | <i>Source</i>                             |
| Communications technology          | 1                    | <i>lmedia2</i>                               | Radios pc, log-trans.                               | Banks (nd)                                |
|                                    | 1                    | <i>lmedia4</i>                               | TV's pc, log-trans.                                 | Banks (nd)                                |
|                                    | 1                    | <i>lmedia5</i>                               | Newspaper circulation pc, log-trans.                | Banks (nd)                                |
|                                    | 1                    | <i>lphone6</i>                               | Phones pc, log-trans.                               | Banks (nd)                                |
| Industrialization and urbanization | 2                    | <i>NVAGRTOTLZS</i>                           | Agriculture's share of economy, % of GDP            | World Bank (2019)                         |
|                                    | 2                    | <i>NVINDTOTLZS</i>                           | Industry's share of economy, % of GDP               | World Bank (2019)                         |
|                                    | 2                    | <i>lnwdieu</i>                               | Energy consumption pc, log-trans.                   | World Bank (2019)                         |
|                                    | 2                    | <i>SPURBTOTLZS</i>                           | Urban population, % of total                        | World Bank (2019)                         |
| Education                          | 3                    | <i>SEPRMENRR</i>                             | School enrollment, primary, % gross                 | World Bank (2019)                         |
|                                    | 3                    | <i>SESECENRR</i>                             | School enrollment, secondary, % gross               | World Bank (2019)                         |
|                                    | 3                    | <i>lnhmcagef</i>                             | Average years of schooling female, log-trans.       | IHME (2010)                               |
|                                    | 3                    | <i>lnhmcagem</i>                             | Average years of schooling male, log-trans.         | IHME (2010)                               |
| Resource curse                     | 4                    | <i>NYGDPPETRTZS</i>                          | Oil rents, % of GDP                                 | World Bank (2019)                         |
|                                    | 4                    | <i>NYGDPTOTLRTZS</i>                         | Resource rents, % of GDP                            | World Bank (2019)                         |
|                                    | 4                    | <i>lnoilgasv2009</i>                         | Oil/gas value pc, log transformed                   | Ross (2013)                               |
|                                    | 5                    | <i>wageshare</i>                             | Wage share                                          | Authors' coding from UNIDO (2011)         |
| Income inequality                  | 5                    | <i>van_familyf2</i>                          | Family farms, %                                     | Vanhanen (2003)                           |
|                                    | 5                    | <i>gini_market</i>                           | GINI market                                         | Solt (2014)                               |
|                                    | 6                    | <i>NYGDPPCAPKDZG</i>                         | Annual growth in GDP, %                             | World Bank (2019)                         |
| Economic performance/policy        | 6                    | <i>lninflation</i>                           | Inflation, % log-trans.                             | World Bank (2019)                         |
|                                    | 6                    | <i>NETRDGNFSZS</i>                           | Trade, % of GDP                                     | World Bank (2019)                         |
|                                    | 6                    | <i>pwL-iss</i>                               | Investment, % of GDP                                | Heston et al. (2011)                      |
|                                    | 7                    | <i>iaep-fed</i>                              | Federal state, dich.                                | Regan et al. (2009) and Wig et al. (2015) |
| Political system                   | 7                    | <i>iaep-pm</i>                               | Plurality and majority system, dich.                | Regan et al. (2009) and Wig et al. (2015) |
|                                    | 7                    | <i>pres</i>                                  | Presidential system, dich.                          | Kefer (2004)                              |
| Ethnic exclusion/inclusion         | 8                    | <i>exclipop</i>                              | Size of excluded ethnic population, %               | Vogt et al. (2015)                        |
|                                    | 8                    | <i>egippop</i>                               | Size of included ethnic population, %               | Vogt et al. (2015)                        |
|                                    | 8                    | <i>maexclipop</i>                            | Size of largest excluded ethnic group, %            | Vogt et al. (2015)                        |

| <i>Concept Label</i>        | <i>Concept No.</i> | <i>Variable Name</i> | <i>Description</i>                               | <i>Source</i>                                       |
|-----------------------------|--------------------|----------------------|--------------------------------------------------|-----------------------------------------------------|
| Colonial heritage           | 9                  | <i>formerc</i>       | Former colony, dich.                             | Hadenius and Teorell (2005)                         |
|                             | 9                  | <i>british</i>       | British colony, dich.                            | Hadenius and Teorell (2005)                         |
|                             | 9                  | <i>spanish</i>       | Spanish colony, dich.                            | Hadenius and Teorell (2005)                         |
|                             | 9                  | <i>french</i>        | French colony, dich.                             | Hadenius and Teorell (2005)                         |
| Capacity of implementations | 10                 | <i>v2x-corr</i>      | Political corruption                             | Coppedge et al. (2019)                              |
|                             | 10                 | <i>v2ctrspct</i>     | Impartial public adm.                            | Coppedge et al. (2019)                              |
|                             | 10                 | <i>ICRGInvest</i>    | Investment profile index                         | PRS Group (2010)                                    |
| Political (in)stability     | 11                 | <i>lntenure</i>      | Length of current executive's tenure, log-trans. | Based on Chiozza et al. (2003)                      |
|                             | 11                 | <i>prevmil</i>       | Previous regime was military dictatorship, dich. | Based on Geddes et al. (2014)                       |
|                             | 11                 | <i>lntsilc</i>       | Time since irregular leader change, log-trans.   | Based on Chiozza et al. (2003)                      |
|                             | 11                 | <i>lndomestic1</i>   | Assassinations, log-trans.                       | Banks (nd)                                          |
|                             | 12                 | <i>lndomestic2</i>   | General Strikes, log-trans.                      | Banks (nd)                                          |
| Mass activism               | 12                 | <i>lndomestic6</i>   | Riots, log-trans.                                | Banks (nd)                                          |
|                             | 12                 | <i>lndomestic8</i>   | Anti-Government Demonstrations, log-trans.       | Banks (nd)                                          |
|                             | 12                 | <i>nonviolent</i>    | Ongoing nonviolent campaign, dich.               | Chenoweth and Stephan (2011)                        |
|                             | 13                 | <i>minor</i>         | Ongoing minor civil conflict, dich.              | Gleditsch et al. (2002) and Petterson et al. (2019) |
| Armed conflict              | 13                 | <i>major</i>         | Ongoing major civil conflict, dich.              | Gleditsch et al. (2002) and Petterson et al. (2019) |
|                             | 13                 | <i>ethnicw</i>       | Ongoing ethnic conflict, dich.                   | Vogt et al. (2015)                                  |
|                             | 14                 | <i>lntpop</i>        | Population, log-trans.                           | World Bank (2019)                                   |
| Population                  | 14                 | <i>lntpopdens</i>    | Population density, log-trans.                   | World Bank (2019)                                   |
|                             | 14                 | <i>SPP0014TOZS</i>   | Population aged 0-14, %                          | World Bank (2019)                                   |
|                             | 15                 | <i>al-ethnic</i>     | Ethnic Fractionalization                         | Alesina et al. (2003)                               |
|                             | 15                 | <i>al-language</i>   | Linguistic fractionalization                     | Alesina et al. (2003)                               |
| Fractionalization           | 15                 | <i>al-religion</i>   | Religious fractionalization                      | Alesina et al. (2003)                               |
|                             | 15                 | <i>groups</i>        | Number of ethnopolitically relevant groups       | Vogt et al. (2015)                                  |
|                             | 16                 | <i>lp-muslim80</i>   | Muslim population, %                             | La Porta et al. (1999)                              |
|                             | 16                 | <i>lp-catho80</i>    | Catholic population, %                           | La Porta et al. (1999)                              |
| Religion                    | 16                 | <i>lp-protngr80</i>  | Protestant population, %                         | La Porta et al. (1999)                              |
|                             | 17                 | <i>r1</i>            | Sub-saharan Africa, dich.                        | Hadenius and Teorell (2005)                         |
|                             | 17                 | <i>r2</i>            | Central and South America, dich.                 | Hadenius and Teorell (2005)                         |
| Region                      | 17                 | <i>r3</i>            | South East Asia, dich.                           | Hadenius and Teorell (2005)                         |
|                             | 17                 | <i>r4</i>            | Western Europe and North America, dich.          | Hadenius and Teorell (2005)                         |
|                             | 17                 | <i>r5</i>            | Eastern Europe and (former) USSR, dich.          | Hadenius and Teorell (2005)                         |
|                             | 17                 | <i>r6</i>            | North Africa and the Middle East, dich.          | Hadenius and Teorell (2005)                         |

| <i>Concept Label</i>            | <i>Concept No.</i> | <i>Variable Name</i>        | <i>Description</i>                         | <i>Source</i>                                              |
|---------------------------------|--------------------|-----------------------------|--------------------------------------------|------------------------------------------------------------|
| Diffusion/International context | 18                 | <i>prop-dem</i>             | Global proportion of democracies, %        | Based on Marshall et al. (2018)                            |
|                                 | 18                 | <i>lnaid</i>                | Aid received, log-trans.                   | World Bank (2019)                                          |
|                                 | 18                 | <i>m-polity-neigh</i>       | Neighborhood Polity score, $\mu$           | Based on Marshall et al. (2018) and Weidmann et al. (2010) |
|                                 | 18                 | <i>m_hundigdpcc-c-neigh</i> | Neighborhood GDP pc, $\mu$                 | Based on World Bank (2019) and Weidmann et al. (2010)      |
|                                 | 18                 | <i>ilc-neigh</i>            | Neighboring irregular leader change, dich. | Based on Chiozza et al. (2003) and Weidmann et al. (2010)  |

Table A-2: Proposed determinants of democracy, 19 concepts

| Social and economic concepts |                                    | Political and institutional concepts |                                           | Demographic, cultural, and contextual concepts |                                     |
|------------------------------|------------------------------------|--------------------------------------|-------------------------------------------|------------------------------------------------|-------------------------------------|
| (1)                          | Communications technology          | (7)                                  | Political system                          | (14)                                           | Population                          |
| (2)                          | Industrialization and urbanization | (8)                                  | Ethnic exclusion                          | (15)                                           | Fractionalization                   |
| (3)                          | Education                          | (9)                                  | Colonial heritage                         | (16)                                           | Religion                            |
| (4)                          | Resource curse                     | (10)                                 | Institutional capacity for implementation | (17)                                           | Region                              |
| (5)                          | Inequality                         | (11)                                 | Political (in)stability                   | (18)                                           | Diffusion/<br>International context |
| (6)                          | Economic policy/performance        | (12)                                 | Mass activism                             |                                                |                                     |
|                              |                                    | (13)                                 | Armed conflict                            |                                                |                                     |

## B Imputation

As mentioned in the article’s main text, many variables have missing values (see Table A-3). Instead of resorting to listwise deletion of observations or excluding indicators with a large number of missing values, we imputed values using the AMELIA II software (Honaker and King 2010). Imputation allows us to use a large number of variables without reducing the number of observations and can mitigate potential sample-selection biases. Moreover, the AMELIA II software allows the imputation model to account for the cross sectional–time series structure of the data we use. Thus, imputation not only allows us to keep the number of observations constant and include a large number of variables, it also enables us to move beyond ad-hoc ways of dealing with missing data, such as linear interpolation, means, or best guesses (Honaker and King 2010). We added all variables in Table A-1 (except the region dummies) to the imputation model. We set the minimum and maximum values as bounds for variables with specified ranges (e.g. indices and fractions), and the empirically observed minimum and maximum for all other variables. Our imputation model applied a second-order polynomial of time, and time trends were interacted with cross-section units to allow for country-specific trends. Our imputation model computed ten different datasets (see supplementary data) and for each regression we randomly select one of the ten datasets to fit the model. In this way, we avoid that one set of imputations drive our results.

Overall, the imputation model performs well. Figure 1 illustrates this by displaying density (left panel) and overimputation (right panel) plots for two variables, GDP pc and wageshare (Honaker et al. 2011). The density plots show the distributions of observed and imputed values. In the left panel, we see that the distributions of imputed and observed values for GDP pc (top left) and wageshare (bottom left) are quite similar. At the same time, we see that the density of imputations on high values of wageshare is low. This is to be expected, given the plausible assumption that developing countries which have higher number of missing values also have high inequality (low wageshare values). The overimputation plots in the right panel are generated by treating observed values as if they were missing and subsequently using the imputation model to predict these (artificially missing) observed values. If our model performs well, we would expect observed and imputed values to align on the diagonal line. This is exactly what we see in the right panel, thus

our imputation model provides fairly accurate predictions for both GDP pc (top) and wageshare (bottom).

Figure 1: Density and overimputation plots for variables *lnwdigdppc\_c* (top) and *wageshare* (bottom)

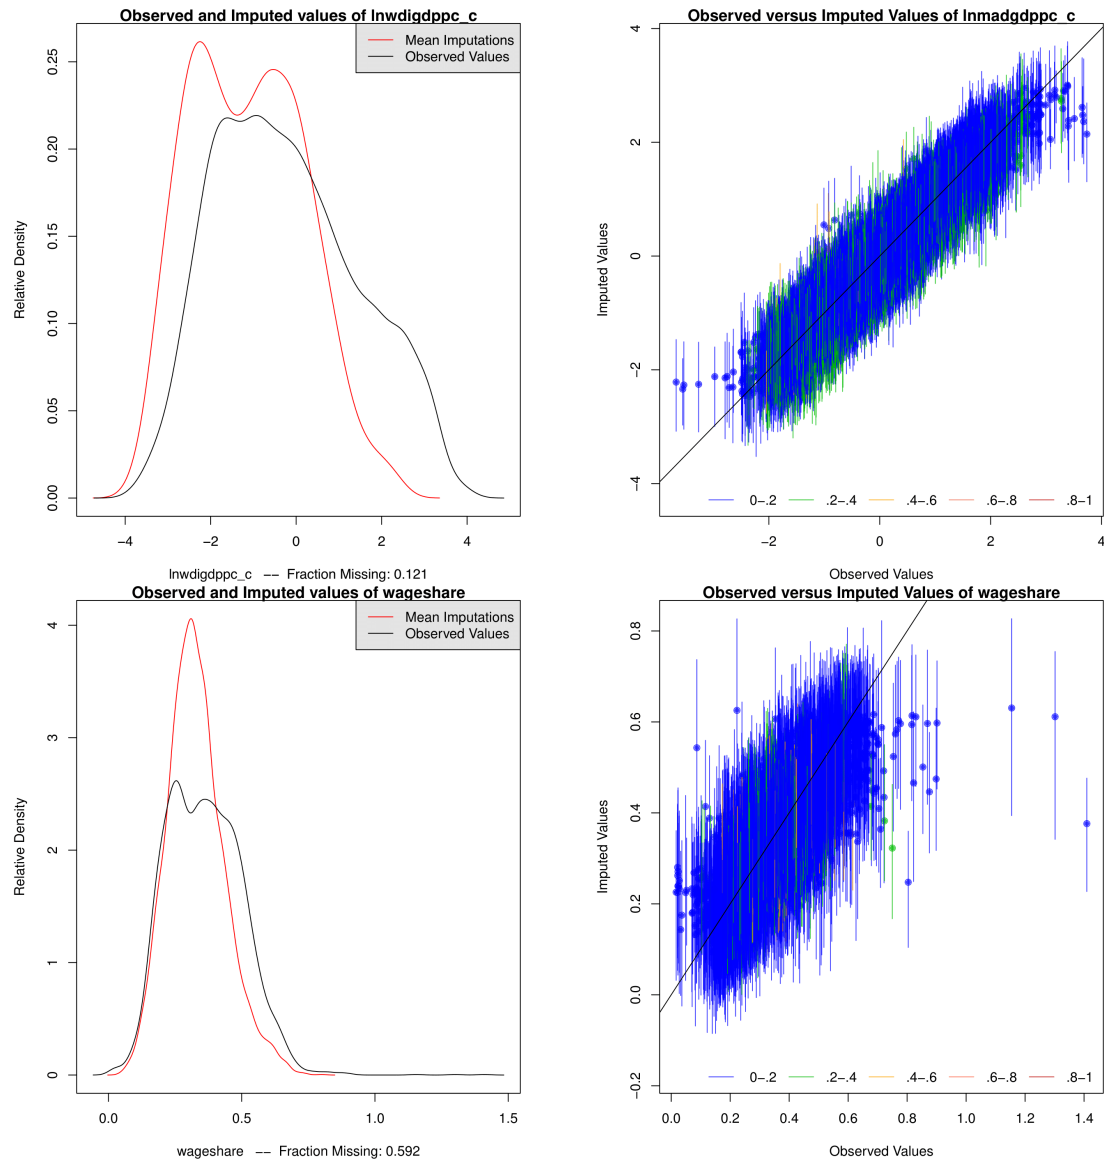



|               | Fraction missing |
|---------------|------------------|
| polity2       | 0.0000           |
| ACLP          | 0.0016           |
| BMR           | 0.0122           |
| v2x_regime    | 0.0023           |
| lnmadgdppc_c  | 0.0999           |
| lnwdigdppc_c  | 0.1207           |
| lnmedia2      | 0.3770           |
| lnmedia4      | 0.3910           |
| lnmedia5      | 0.3649           |
| lnphone6      | 0.1752           |
| NVAGRTOTLZS   | 0.2682           |
| NVINDTOTLZS   | 0.2777           |
| lnwdieu       | 0.3267           |
| SPURBTOTLINZS | 0.0178           |
| SEPRMENRR     | 0.2936           |
| SESECENRR     | 0.3925           |
| lnhme_ayef    | 0.3194           |
| lnhme_ayem    | 0.3194           |
| NYGDPPETRRTZS | 0.2663           |
| NYGDPTOTLRTZS | 0.2284           |
| lnoilgasv2014 | 0.0499           |
| wageshare     | 0.5922           |
| gini_market   | 0.4868           |
| van_familyf2  | 0.2174           |
| NYGDPMKTPKDZG | 0.1476           |
| lninflation   | 0.2462           |

|                 |        |
|-----------------|--------|
| NETRDGNFSZS     | 0.1772 |
| pwt_isg         | 0.1966 |
| iaep_fed        | 0.0883 |
| iaep_pm         | 0.1645 |
| pres            | 0.2627 |
| egipop          | 0.0046 |
| exclpop         | 0.0046 |
| maxexclpop      | 0.0046 |
| formerc         | 0.0523 |
| british         | 0.0523 |
| spanish         | 0.0523 |
| french          | 0.0523 |
| v2x_corr        | 0.0041 |
| v2clrspct       | 0.0000 |
| icrg_investment | 0.5414 |
| lntenure        | 0.0094 |
| lntsilc         | 0.0094 |
| prevmil         | 0.0000 |
| lndomestic1     | 0.1232 |
| lndomestic2     | 0.1232 |
| lndomestic6     | 0.1232 |
| lndomestic8     | 0.1232 |
| nonviolenty     | 0.1781 |
| minor           | 0.0000 |
| major           | 0.0000 |
| ethnicw         | 0.0046 |
| lnpopdens       | 0.0476 |
| lnpop           | 0.0182 |

|                           |        |
|---------------------------|--------|
| SPPOP0014TOZS             | 0.0178 |
| al_ethnic                 | 0.0345 |
| al_language               | 0.0638 |
| al_religion               | 0.0314 |
| groups                    | 0.0046 |
| lp_catho80                | 0.1236 |
| lp_muslim80               | 0.1236 |
| lp_protmg80               | 0.1236 |
| r1                        | 0.0000 |
| r2                        | 0.0000 |
| r3                        | 0.0000 |
| r4                        | 0.0000 |
| r5                        | 0.0000 |
| r6                        | 0.0000 |
| propdem                   | 0.0000 |
| lnaid                     | 0.2733 |
| m_polity_neigh            | 0.0400 |
| m_lnwdigdppc_c_neighmean2 | 0.0527 |
| ilc_neigh                 | 0.0400 |

Table A-3: Fraction of observations imputed for each variable

## C Meta analyses

Table A-4: Meta analysis of the effect of GDP pc on democratization 1960-2015

| <i>Dependent variable:</i>              |                             |
|-----------------------------------------|-----------------------------|
| GDP pc on democratization = significant |                             |
| BMR                                     | -1.901***<br>(0.008)        |
| ACLP                                    | -1.358***<br>(0.007)        |
| Polity                                  | -1.707***<br>(0.008)        |
| Constant                                | 0.781***<br>(0.005)         |
|                                         |                             |
| Observations                            | 670,000                     |
| Log Likelihood                          | -406,981.700                |
| Akaike Inf. Crit.                       | 813,971.500                 |
|                                         |                             |
| <i>Note:</i>                            | *p<0.1; **p<0.05; ***p<0.01 |

Table A-5: Meta analysis of the effect of GDP pc on democratization

| <i>Dependent variable:</i>              |                             |
|-----------------------------------------|-----------------------------|
| GDP pc on democratization = significant |                             |
| Natural resource controls               | 0.935***<br>(0.004)         |
| Constant                                | -1.056***<br>(0.002)        |
|                                         |                             |
| Observations                            | 2,680,000                   |
| Log Likelihood                          | -1,575,272.000              |
| Akaike Inf. Crit.                       | 3,150,547.000               |
|                                         |                             |
| <i>Note:</i>                            | *p<0.1; **p<0.05; ***p<0.01 |

Table A-6: Meta analysis of the effect of Muslim population on democratization

| <i>Dependent variable:</i>                         |                             |
|----------------------------------------------------|-----------------------------|
| Muslim population on democratization = significant |                             |
| Natural resource                                   | -1.695***<br>(0.041)        |
| Constant                                           | -0.278***<br>(0.011)        |
| Observations                                       | 40,000                      |
| Log Likelihood                                     | -25,488.300                 |
| Akaike Inf. Crit.                                  | 50,980.600                  |
| <i>Note:</i>                                       | *p<0.1; **p<0.05; ***p<0.01 |

Table A-7: Meta analysis of the effect of Muslim population on democratization

| <i>Dependent variable:</i>                         |                             |
|----------------------------------------------------|-----------------------------|
| Muslim population on democratization = significant |                             |
| Neighborhood Polity                                | -3.212***<br>(0.144)        |
| Constant                                           | -0.393***<br>(0.010)        |
| Observations                                       | 40,000                      |
| Log Likelihood                                     | -25,924.240                 |
| Akaike Inf. Crit.                                  | 51,852.490                  |
| <i>Note:</i>                                       | *p<0.1; **p<0.05; ***p<0.01 |

## D Fraction of robust indicators by concept

| Concept name                           | Nr variables | PolityIV | ACLP | BMR  | VDem | All  |
|----------------------------------------|--------------|----------|------|------|------|------|
| Communication technology proliferation | 4            | 0.75     | 0.75 | 0.75 | 0.75 | 0.75 |
| Industrialization and urbanization     | 4            | 0.50     | 0.75 | 0.75 | 0.50 | 0.50 |
| Education                              | 4            | 0.50     | 0.50 | 0.50 | 0.50 | 0.50 |
| Resource curse                         | 3            | 1.00     | 1.00 | 1.00 | 1.00 | 1.00 |
| Income inequality                      | 3            | 0.33     | 0.33 | 0.00 | 0.67 | 0.00 |
| Economic performance/policy            | 4            | 0.50     | 0.50 | 0.25 | 0.00 | 0.00 |
| Political system                       | 3            | 0.33     | 0.33 | 0.33 | 0.33 | 0.33 |
| Ethnic exclusion/inclusion             | 3            | 0.67     | 0.33 | 0.33 | 0.67 | 0.00 |
| Colonial heritage                      | 4            | 0.25     | 0.25 | 0.50 | 0.00 | 0.00 |
| Capacity of implementations            | 3            | 0.00     | 0.00 | 0.00 | 0.67 | 0.00 |
| Political (in)stability                | 4            | 1.00     | 0.75 | 0.50 | 0.75 | 0.50 |
| Mass activism                          | 4            | 1.00     | 1.00 | 1.00 | 0.50 | 0.50 |
| Armed conflict                         | 3            | 0.67     | 0.33 | 0.33 | 0.00 | 0.00 |
| Population                             | 3            | 0.67     | 0.00 | 0.33 | 0.00 | 0.00 |
| Fractionalization                      | 4            | 0.00     | 0.00 | 0.25 | 0.00 | 0.00 |
| Religion                               | 3            | 0.33     | 0.67 | 0.33 | 0.33 | 0.00 |
| Region                                 | 6            | 0.50     | 0.50 | 0.50 | 0.50 | 0.50 |
| Diffusion/international context        | 5            | 0.60     | 0.60 | 0.80 | 0.80 | 0.40 |

Table A-8: Robustness by concept: Democratization

| Concept name                           | Nr variables | PolityIV | ACLP | BMR  | VDem | All  |
|----------------------------------------|--------------|----------|------|------|------|------|
| Communication technology proliferation | 4            | 0.00     | 0.00 | 0.00 | 0.25 | 0.00 |
| Industrialization and urbanization     | 4            | 0.00     | 0.25 | 0.00 | 0.00 | 0.00 |
| Education                              | 4            | 0.00     | 0.25 | 0.00 | 0.00 | 0.00 |
| Resource curse                         | 3            | 0.00     | 0.00 | 0.33 | 0.00 | 0.00 |
| Income inequality                      | 3            | 0.33     | 0.00 | 0.33 | 0.00 | 0.00 |
| Economic performance/policy            | 4            | 0.25     | 0.25 | 0.25 | 0.25 | 0.00 |
| Political system                       | 3            | 0.00     | 0.00 | 0.00 | 0.00 | 0.00 |
| Ethnic exclusion/inclusion             | 3            | 0.00     | 0.67 | 0.33 | 0.00 | 0.00 |
| Colonial heritage                      | 4            | 0.00     | 0.00 | 0.00 | 0.00 | 0.00 |
| Capacity of implementations            | 3            | 1.00     | 1.00 | 1.00 | 0.67 | 0.67 |
| Political (in)stability                | 4            | 0.25     | 0.50 | 0.50 | 0.25 | 0.00 |
| Mass activism                          | 4            | 0.00     | 0.00 | 0.00 | 0.00 | 0.00 |
| Armed conflict                         | 3            | 0.33     | 0.00 | 0.00 | 0.00 | 0.00 |
| Population                             | 3            | 0.00     | 0.33 | 0.00 | 0.00 | 0.00 |
| Fractionalization                      | 4            | 0.00     | 0.00 | 0.25 | 0.00 | 0.00 |
| Religion                               | 3            | 0.00     | 0.00 | 0.00 | 0.33 | 0.00 |
| Region                                 | 6            | 0.17     | 0.00 | 0.17 | 0.17 | 0.00 |
| Diffusion/international context        | 5            | 0.00     | 0.40 | 0.20 | 0.20 | 0.00 |

Table A-9: Robustness by concept: Democratic stability

## E Models without GDP pc as a core variable

| Focus variable                     | PolityIV coef | PolityIV t | ACLP coef | ACLP t | BMR coef | BMR t  | VDem coef | VDem t |
|------------------------------------|---------------|------------|-----------|--------|----------|--------|-----------|--------|
| Nonviolent campaign                | 2.267         | 8.757      | 2.165     | 8.385  | 2.295    | 8.785  | 1.625     | 6.245  |
| Demonstrations                     | 0.487         | 7.376      | 0.443     | 6.078  | 0.463    | 7.176  | 0.277     | 3.671  |
| Neighborhood Polity score          | 0.761         | 5.693      | 0.554     | 4.351  | 0.636    | 4.567  | 0.990     | 7.213  |
| Plurality/majority system          | -1.092        | -4.780     | -0.944    | -4.521 | -0.834   | -3.817 | -0.999    | -4.611 |
| TVs pc                             | 0.603         | 4.457      | 0.456     | 3.673  | 0.465    | 3.438  | 0.656     | 4.645  |
| Radios pc                          | 0.564         | 4.252      | 0.432     | 3.563  | 0.469    | 3.340  | 0.690     | 5.840  |
| Average years of education, female | 0.578         | 4.016      | 0.367     | 2.741  | 0.371    | 2.706  | 0.622     | 4.686  |
| Western Europe/North America       | 1.071         | 3.940      | 0.905     | 3.626  | 0.749    | 3.069  | 0.487     | 2.687  |
| Phones pc                          | 0.457         | 3.838      | 0.340     | 2.639  | 0.342    | 2.798  | 0.721     | 6.364  |
| Resource rents, % GDP              | -0.740        | -3.700     | -0.474    | -3.257 | -0.563   | -3.311 | -0.680    | -4.090 |
| Global proportion of democracies   | 0.420         | 3.590      | 0.415     | 3.420  | 0.324    | 2.743  | 0.711     | 6.563  |
| Length of executive tenure         | -0.405        | -3.431     | -0.327    | -3.217 | -0.250   | -2.539 | -0.481    | -4.698 |
| Average years of education, male   | 0.497         | 3.420      | 0.338     | 2.632  | 0.338    | 2.434  | 0.592     | 3.988  |
| Central/South America              | 0.755         | 2.859      | 0.918     | 3.308  | 0.835    | 3.011  | 0.509     | 2.199  |
| Oil rents, % GDP                   | -1.187        | -2.689     | -1.029    | -3.478 | -1.098   | -3.740 | -1.202    | -2.491 |
| Industry's share of economy, %     | -0.268        | -2.502     | -0.250    | -2.459 | -0.358   | -2.991 | -0.291    | -2.837 |
| Time since ILC                     | 0.648         | 2.044      | 0.842     | 3.072  | 0.963    | 3.350  | 0.803     | 3.654  |

Table A-10: List of highly robust determinants for all democracy measures (without GDP pc as fixed variable), results for democratization. Highly robust = significant at .05 for all four democracy measures in regressions run on the full time-series (1960–2008).

| Focus variable                     | PolityIV coef | PolityIV t | ACLP coef | ACLP t | BMR coef | BMR t  | VDem coef | VDem t |
|------------------------------------|---------------|------------|-----------|--------|----------|--------|-----------|--------|
| Western Europe/North America       | 15.194        | 45.757     | 2.389     | 2.401  | 2.660    | 2.686  | 15.550    | 52.649 |
| Political corruption               | -0.802        | -5.040     | -0.670    | -3.811 | -0.634   | -3.726 | -0.807    | -4.740 |
| Impartial public adm.              | 1.541         | 4.958      | 1.048     | 5.730  | 1.210    | 5.118  | 1.570     | 6.550  |
| Energy consumption pc              | 0.510         | 4.537      | 0.644     | 3.679  | 0.355    | 2.053  | 0.442     | 2.699  |
| Urban population, %                | 0.861         | 4.398      | 0.797     | 3.818  | 0.565    | 2.489  | 0.546     | 3.209  |
| Agriculture's share of economy, %  | -0.663        | -4.355     | -0.594    | -3.851 | -0.498   | -2.876 | -0.423    | -2.460 |
| Investment profile index           | 0.724         | 4.110      | 0.623     | 3.857  | 0.663    | 3.840  | 0.305     | 2.013  |
| School enrollment, secondary, %    | 0.849         | 3.439      | 0.978     | 5.342  | 0.711    | 3.067  | 0.476     | 2.654  |
| Average years of education, female | 0.612         | 3.005      | 0.897     | 5.037  | 0.663    | 3.414  | 0.336     | 2.070  |
| Average years of education, male   | 0.554         | 2.952      | 0.829     | 5.585  | 0.609    | 3.390  | 0.293     | 2.021  |
| Newspapers pc                      | 0.381         | 2.914      | 0.420     | 2.783  | 0.308    | 2.338  | 0.442     | 3.913  |
| Neighborhood Polity score          | 0.525         | 2.808      | 0.810     | 5.215  | 0.630    | 3.951  | 0.297     | 2.052  |

Table A-11: List of highly robust determinants for all democracy measures (without GDP pc as fixed variable), results for democratic stability. Highly robust = significant at .05 for all four democracy measures in regressions run on the full time-series (1960–2008).



# F Separating within- and between-effects, GDP pc

Figure 2: Within- (left) and between-country (right) coefficients for GDP pc and democratization, all specifications. Black = significant at .05 level. Dark grey = significant at .10 level. Grey = insignificant.

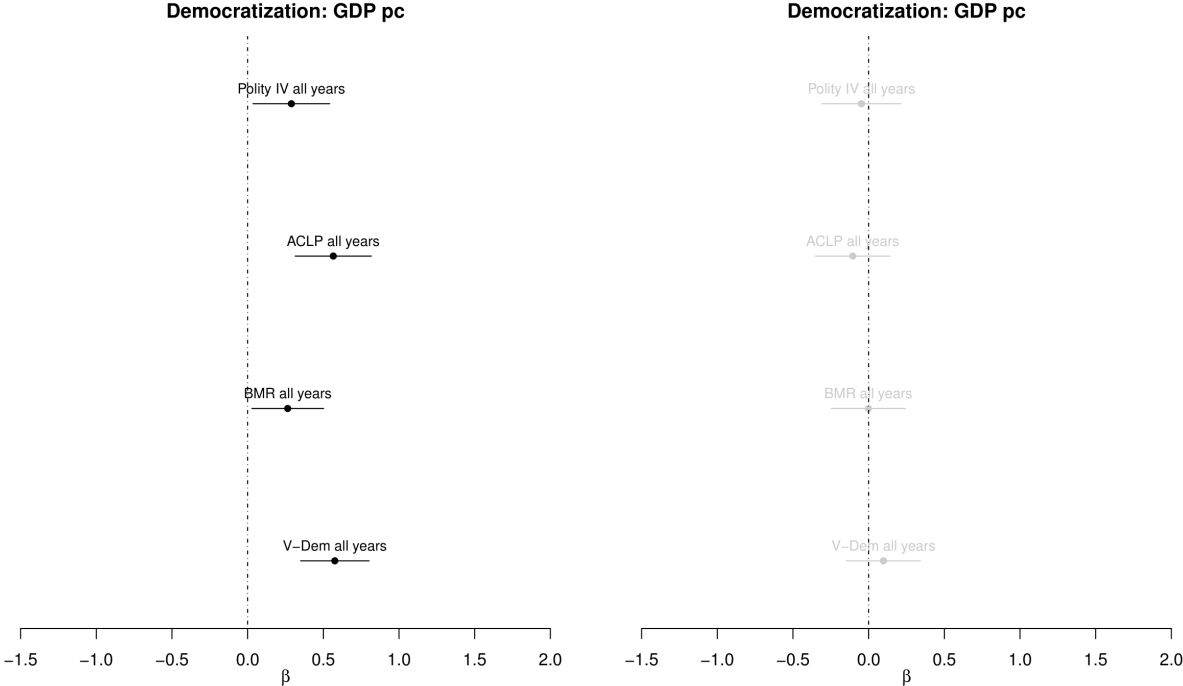

Figure 3: Within- (left) and between-country (right) coefficients for GDP pc and democratic stability, all specifications. Black = significant at .05 level. Dark grey = significant at .10 level. Grey = insignificant.

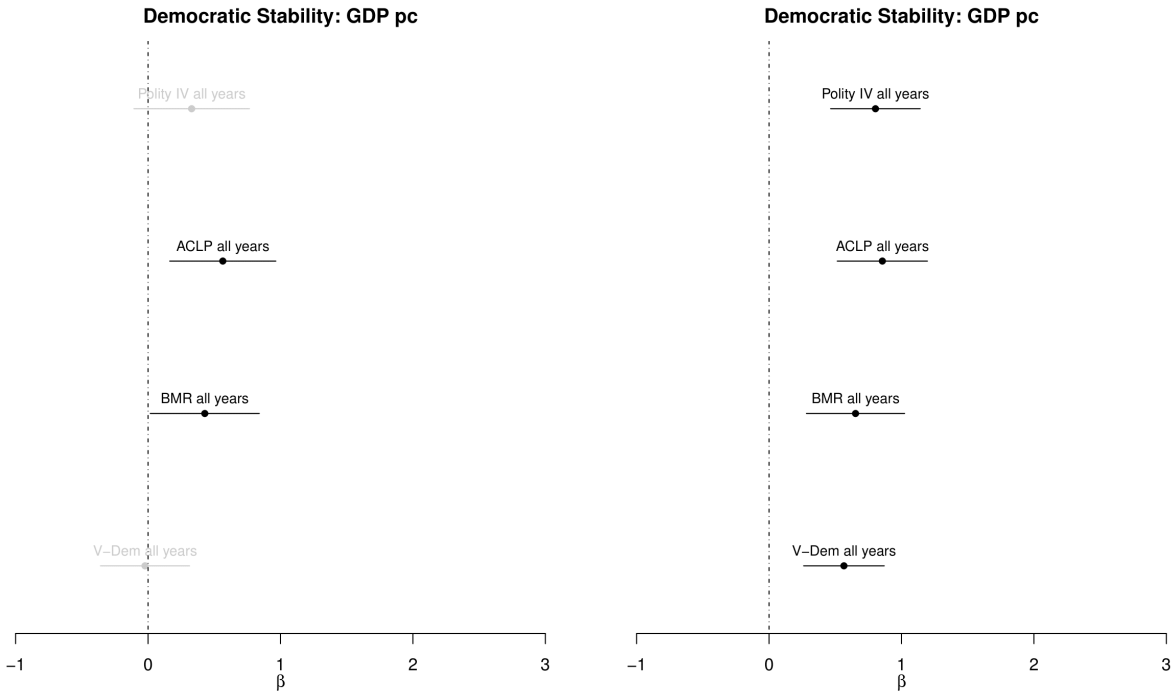

Figure 4: Within- (left) and between-country (right) coefficients for GDP pc and democratization controlling for natural resources. Black = significant at .05 level. Dark grey = significant at .10 level. Grey = insignificant.

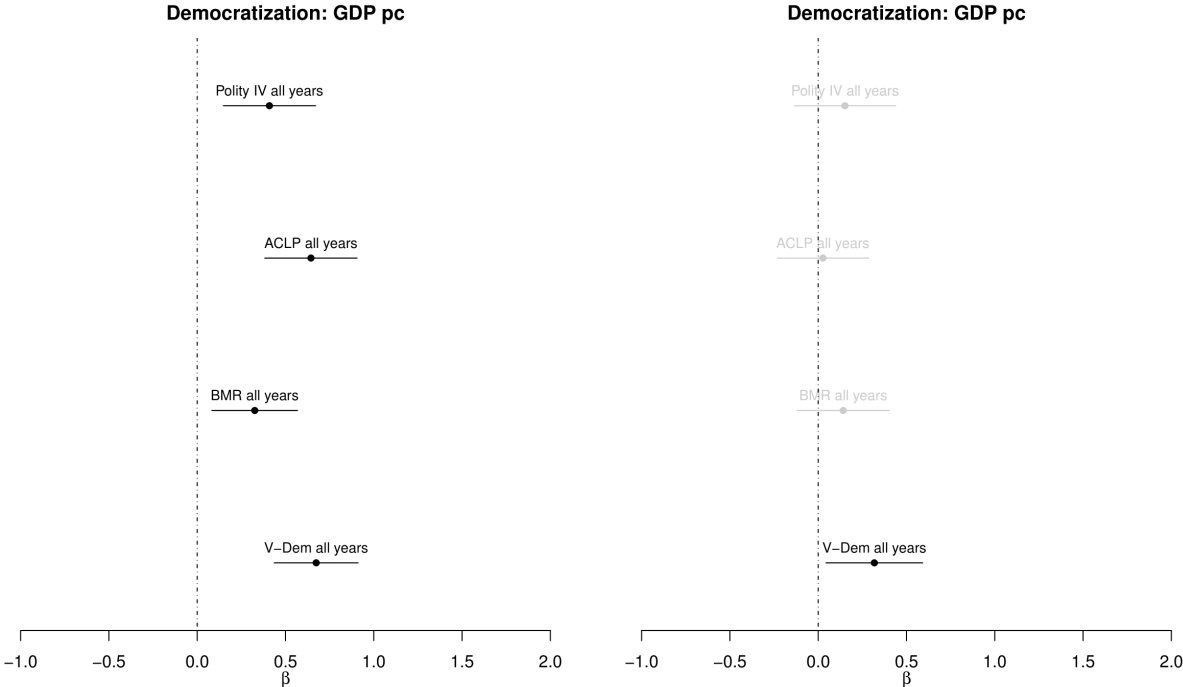

| Focus variable                     | PolityIV coef | PolityIV t | ACLP coef | ACLP t | BMR coef | BMR t  | VDem coef | VDem t |
|------------------------------------|---------------|------------|-----------|--------|----------|--------|-----------|--------|
| Length of executive tenure         | -1.869        | -8.099     | -2.278    | -8.527 | -1.835   | -5.742 | -1.454    | -6.390 |
| Plurality/majority system          | -1.589        | -4.866     | -1.417    | -4.630 | -1.352   | -4.195 | -1.313    | -3.984 |
| Resource rents, % GDP              | -1.049        | -4.590     | -0.765    | -4.395 | -0.831   | -4.236 | -0.763    | -4.337 |
| Industry's share of economy, %     | -0.762        | -4.392     | -0.607    | -4.035 | -0.818   | -5.093 | -0.788    | -4.376 |
| Neighborhood Polity score          | 0.693         | 4.235      | 0.602     | 3.659  | 0.643    | 3.647  | 0.761     | 4.702  |
| Western Europe/North America       | 1.561         | 4.175      | 1.894     | 5.280  | 1.164    | 3.615  | 1.308     | 3.995  |
| Strikes                            | 0.790         | 3.874      | 0.761     | 3.155  | 0.907    | 5.546  | 0.534     | 2.796  |
| Average years of education, female | 0.595         | 3.200      | 0.411     | 2.479  | 0.358    | 2.132  | 0.415     | 2.533  |
| Catholic population, %             | 0.366         | 3.111      | 0.399     | 3.222  | 0.326    | 2.778  | 0.199     | 1.990  |
| Time since ILC                     | 1.440         | 3.098      | 2.078     | 3.970  | 1.804    | 3.780  | 0.798     | 2.376  |
| Central/South America              | 0.838         | 3.072      | 1.079     | 3.600  | 0.834    | 2.829  | 0.516     | 2.039  |
| Oil rents, % GDP                   | -1.494        | -2.791     | -1.185    | -3.606 | -1.299   | -4.230 | -1.252    | -3.060 |
| Trade, % GDP                       | -0.502        | -2.609     | -0.502    | -2.804 | -0.688   | -3.450 | -0.308    | -2.019 |

Table A-12: List of highly robust determinants for all democracy measures (Mundlak between estimate), results for democratization. Highly robust = significant at .05 for all four democracy measures in regressions run on the full time-series (1960–2008).

| Focus variable                     | PolityIV coef | PolityIV t | ACLP coef | ACLP t | BMR coef | BMR t | VDem coef | VDem t |
|------------------------------------|---------------|------------|-----------|--------|----------|-------|-----------|--------|
| Nonviolent campaign                | 2.278         | 7.289      | 2.129     | 6.270  | 2.394    | 7.210 | 1.374     | 4.299  |
| Demonstrations                     | 0.479         | 6.275      | 0.421     | 4.509  | 0.408    | 4.763 | 0.269     | 2.798  |
| TVs pc                             | 1.027         | 4.877      | 0.687     | 3.417  | 0.784    | 3.381 | 0.957     | 5.166  |
| Population density                 | 2.370         | 4.268      | 1.526     | 2.920  | 2.019    | 3.725 | 2.205     | 5.129  |
| Population                         | 2.105         | 4.254      | 1.448     | 3.201  | 1.729    | 3.611 | 1.967     | 5.102  |
| Average years of education, male   | 0.995         | 4.034      | 0.717     | 3.333  | 0.656    | 2.685 | 1.107     | 5.211  |
| Radios pc                          | 0.849         | 4.001      | 0.612     | 3.244  | 0.585    | 2.828 | 0.767     | 4.473  |
| Average years of education, female | 0.938         | 3.399      | 0.582     | 2.520  | 0.534    | 1.997 | 0.903     | 3.931  |
| Urban population, %                | 1.017         | 2.305      | 0.917     | 2.217  | 1.046    | 2.737 | 1.258     | 3.259  |
| Aid received                       | 0.264         | 1.994      | 0.308     | 2.359  | 0.382    | 2.975 | 0.374     | 3.270  |

Table A-13: List of highly robust determinants for all democracy measures (Mundlak within estimate), results for democratization. Highly robust = significant at .05 for all four democracy measures in regressions run on the full time-series (1960–2008).

| Focus variable           | PolityIV coef | PolityIV t | ACLP coef | ACLP t | BMR coef | BMR t  | VDem coef | VDem t |
|--------------------------|---------------|------------|-----------|--------|----------|--------|-----------|--------|
| Previous military regime | 1.227         | 4.608      | 1.603     | 4.513  | 1.008    | 2.819  | 0.850     | 3.813  |
| Investment profile index | 1.118         | 3.657      | 1.356     | 3.272  | 1.590    | 4.551  | 0.804     | 2.328  |
| Impartial public adm.    | 1.431         | 3.381      | 0.808     | 2.805  | 1.248    | 3.491  | 1.217     | 4.185  |
| Political corruption     | -0.637        | -2.605     | -0.537    | -2.339 | -0.666   | -3.101 | -0.625    | -2.974 |

Table A-14: List of highly robust determinants for all democracy measures (Mundlak between estimate), results for democratic stability. Highly robust = significant at .05 for all four democracy measures in regressions run on the full time-series (1960–2008).

| Focus variable            | PolityIV coef | PolityIV t | ACLP coef | ACLP t | BMR coef | BMR t  | VDem coef | VDem t |
|---------------------------|---------------|------------|-----------|--------|----------|--------|-----------|--------|
| Middle East/North Africa  | 2.632         | 5.088      | 39.226    | 9.814  | 42.256   | 9.865  | 1.479     | 3.057  |
| Impartial public adm.     | 1.304         | 2.710      | 0.662     | 2.137  | 0.894    | 2.285  | 2.041     | 4.677  |
| Riots                     | -0.446        | -2.486     | -0.318    | -2.270 | -0.339   | -2.471 | -0.269    | -2.214 |
| Neighborhood Polity score | 0.734         | 2.470      | 0.857     | 3.331  | 0.762    | 3.331  | 0.832     | 3.278  |

Table A-15: List of highly robust determinants for all democracy measures (Mundlak within estimate), results for democratic stability. Highly robust = significant at .05 for all four democracy measures in regressions run on the full time-series (1960–2008).

## G Models with GDP pc data from Bolt et al. (2018)

Figure 5: Coefficient plots of  $\bar{\beta}$  with 95% C.I. across all specifications for GDP pc (Bolt et al. 2018) and democratization (left) and GDP pc on democratic stability (right). Black = significant at .05 level. Dark grey = significant at .10 level. Grey = insignificant.

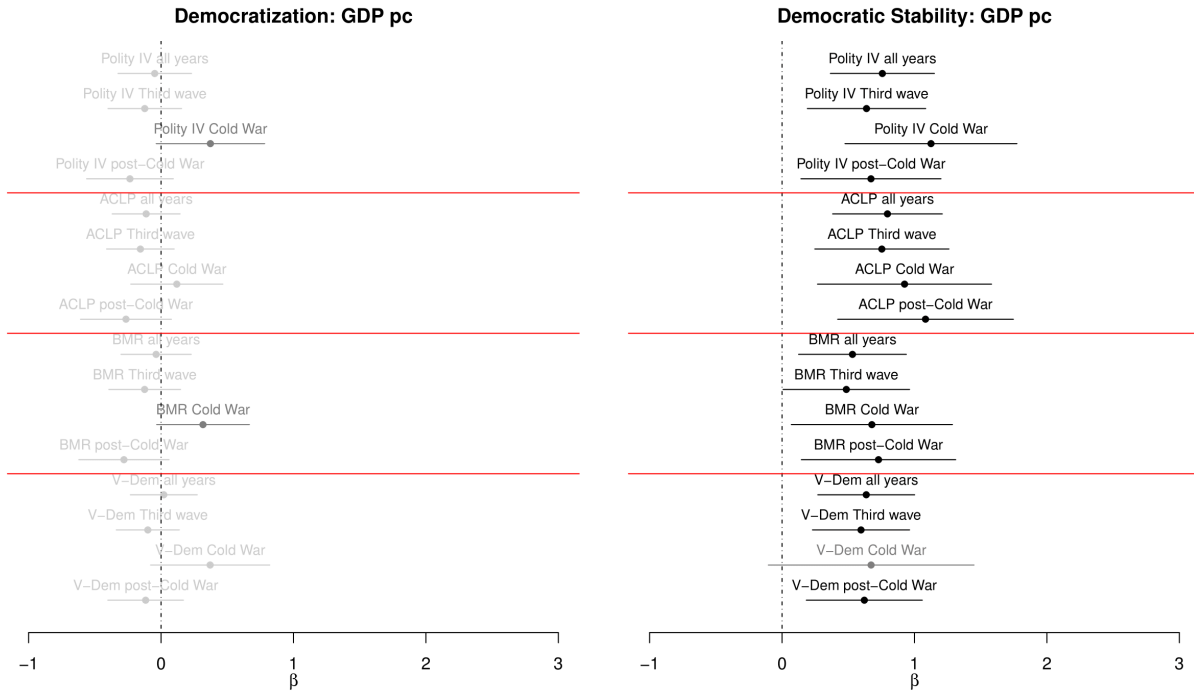

H Most robust determinants when excluding proximate indicators (mass activism) as control variables

| Focus variable                     | PolityIV coef | PolityIV t | ACLP coef | ACLP t | BMR coef | BMR t  | VDem coef | VDem t |
|------------------------------------|---------------|------------|-----------|--------|----------|--------|-----------|--------|
| Nonviolent campaign                | 2.244         | 8.467      | 2.134     | 8.009  | 2.271    | 8.447  | 1.528     | 5.652  |
| Demonstrations                     | 0.481         | 7.194      | 0.433     | 5.875  | 0.457    | 7.106  | 0.240     | 3.078  |
| Neighborhood Polity score          | 0.740         | 5.256      | 0.530     | 4.101  | 0.625    | 4.449  | 0.901     | 6.215  |
| Plurality/majority system          | -1.083        | -4.697     | -0.936    | -4.403 | -0.820   | -3.692 | -0.956    | -4.277 |
| TVs pc                             | 0.835         | 4.679      | 0.576     | 3.437  | 0.602    | 3.586  | 0.604     | 3.052  |
| Energy consumption pc              | -0.539        | -4.672     | -0.561    | -5.787 | -0.326   | -2.481 | -0.490    | -3.722 |
| Radios pc                          | 0.675         | 3.930      | 0.467     | 3.054  | 0.540    | 3.209  | 0.632     | 4.395  |
| Resource rents, % GDP              | -0.751        | -3.877     | -0.495    | -3.428 | -0.576   | -3.411 | -0.702    | -4.560 |
| Western Europe/North America       | 1.074         | 3.865      | 0.892     | 3.633  | 0.714    | 3.006  | 0.472     | 2.541  |
| Phones pc                          | 0.687         | 3.857      | 0.371     | 2.024  | 0.414    | 2.443  | 0.772     | 4.519  |
| Average years of education, female | 0.639         | 3.840      | 0.348     | 2.346  | 0.371    | 2.504  | 0.497     | 3.310  |
| Industry's share of economy, %     | -0.447        | -3.656     | -0.416    | -3.501 | -0.527   | -3.939 | -0.648    | -5.349 |
| Oil/gas value pc                   | -0.541        | -3.594     | -0.373    | -2.635 | -0.282   | -1.963 | -0.621    | -4.413 |
| Length of executive tenure         | -0.412        | -3.466     | -0.332    | -3.246 | -0.258   | -2.378 | -0.508    | -4.858 |
| Average years of education, male   | 0.525         | 3.135      | 0.316     | 2.166  | 0.322    | 2.185  | 0.460     | 2.763  |
| Oil rents, % GDP                   | -1.292        | -3.031     | -1.098    | -3.898 | -1.162   | -4.233 | -1.281    | -3.087 |
| Global proportion of democracies   | 0.388         | 2.964      | 0.374     | 2.855  | 0.289    | 2.218  | 0.618     | 4.873  |
| Central/South America              | 0.735         | 2.706      | 0.919     | 3.321  | 0.824    | 2.900  | 0.494     | 2.121  |
| Time since ILC                     | 0.688         | 2.171      | 0.884     | 3.193  | 0.988    | 3.430  | 0.874     | 3.931  |
| Middle East/North Africa           | -1.471        | -2.136     | -1.972    | -2.811 | -1.709   | -2.834 | -1.883    | -3.294 |

Table A-16: List of highly robust determinants for all democracy measures, results for democratization. Highly robust = significant at .05 for all four democracy measures in regressions run on the full time-series (1960–2015), excluding mass activism indicators as controls.

| Focus variable        | PolityIV coef | PolityIV t | ACLP coef | ACLP t | BMR coef | BMR t  | VDem coef | VDem t |
|-----------------------|---------------|------------|-----------|--------|----------|--------|-----------|--------|
| Impartial public adm. | 1.350         | 4.325      | 0.772     | 3.800  | 1.045    | 3.946  | 1.518     | 5.872  |
| Political corruption  | -0.670        | -4.203     | -0.421    | -2.198 | -0.465   | -2.610 | -0.742    | -4.189 |

Table A-17: List of highly robust determinants for all democracy measures, results for democratic stability. Highly robust = significant at .05 for all four democracy measures in regressions run on the full time-series (1960–2015), excluding mass activism indicators as controls.



# I Democratization: results for all indicators, sorted by variable and concept

| Focus variable | Democracy variable | Time period   | Coefficient | T-value |
|----------------|--------------------|---------------|-------------|---------|
| Radios pc      | ACLP               | all years     | 0.462       | 3.020   |
| Radios pc      | ACLP               | Cold War      | 0.454       | 2.086   |
| Radios pc      | ACLP               | post-Cold War | 0.090       | 0.393   |
| Radios pc      | ACLP               | Third wave    | 0.372       | 2.302   |
| Radios pc      | BMR                | all years     | 0.536       | 3.172   |
| Radios pc      | BMR                | Cold War      | 0.441       | 1.769   |
| Radios pc      | BMR                | post-Cold War | 0.231       | 0.989   |
| Radios pc      | BMR                | Third wave    | 0.536       | 3.262   |
| Radios pc      | PolityIV           | all years     | 0.673       | 3.904   |
| Radios pc      | PolityIV           | Cold War      | 0.550       | 2.033   |
| Radios pc      | PolityIV           | post-Cold War | 0.330       | 1.404   |
| Radios pc      | PolityIV           | Third wave    | 0.649       | 3.770   |
| Radios pc      | V-Dem              | all years     | 0.633       | 4.402   |
| Radios pc      | V-Dem              | Cold War      | 0.867       | 2.972   |
| Radios pc      | V-Dem              | post-Cold War | 0.055       | 0.276   |
| Radios pc      | V-Dem              | Third wave    | 0.425       | 2.885   |
| TVs pc         | ACLP               | all years     | 0.560       | 3.353   |
| TVs pc         | ACLP               | Cold War      | 0.694       | 2.729   |
| TVs pc         | ACLP               | post-Cold War | 0.001       | 0.005   |
| TVs pc         | ACLP               | Third wave    | 0.528       | 3.348   |
| TVs pc         | BMR                | all years     | 0.587       | 3.500   |
| TVs pc         | BMR                | Cold War      | 0.779       | 2.701   |
| TVs pc         | BMR                | post-Cold War | 0.020       | 0.091   |
| TVs pc         | BMR                | Third wave    | 0.618       | 3.854   |
| TVs pc         | PolityIV           | all years     | 0.822       | 4.598   |
| TVs pc         | PolityIV           | Cold War      | 1.052       | 3.842   |
| TVs pc         | PolityIV           | post-Cold War | 0.251       | 1.091   |
| TVs pc         | PolityIV           | Third wave    | 0.788       | 4.366   |
| TVs pc         | V-Dem              | all years     | 0.597       | 3.021   |
| TVs pc         | V-Dem              | Cold War      | 0.393       | 1.202   |
| TVs pc         | V-Dem              | post-Cold War | 0.168       | 0.828   |
| TVs pc         | V-Dem              | Third wave    | 0.517       | 2.744   |
| Newspapers pc  | ACLP               | all years     | 0.023       | 0.150   |
| Newspapers pc  | ACLP               | Cold War      | 0.647       | 2.489   |
| Newspapers pc  | ACLP               | post-Cold War | -0.255      | -1.345  |
| Newspapers pc  | ACLP               | Third wave    | 0.065       | 0.408   |
| Newspapers pc  | BMR                | all years     | 0.256       | 1.639   |
| Newspapers pc  | BMR                | Cold War      | 0.843       | 3.196   |
| Newspapers pc  | BMR                | post-Cold War | 0.184       | 0.838   |
| Newspapers pc  | BMR                | Third wave    | 0.352       | 2.007   |
| Newspapers pc  | PolityIV           | all years     | 0.215       | 1.283   |
| Newspapers pc  | PolityIV           | Cold War      | 0.946       | 3.567   |
| Newspapers pc  | PolityIV           | post-Cold War | 0.193       | 0.884   |
| Newspapers pc  | PolityIV           | Third wave    | 0.304       | 1.721   |
| Newspapers pc  | V-Dem              | all years     | -0.111      | -0.781  |
| Newspapers pc  | V-Dem              | Cold War      | 0.358       | 1.112   |
| Newspapers pc  | V-Dem              | post-Cold War | -0.034      | -0.194  |
| Newspapers pc  | V-Dem              | Third wave    | 0.037       | 0.241   |

|                                   |          |               |        |        |
|-----------------------------------|----------|---------------|--------|--------|
| Phones pc                         | ACLP     | all years     | 0.364  | 1.977  |
| Phones pc                         | ACLP     | Cold War      | 0.546  | 1.813  |
| Phones pc                         | ACLP     | post-Cold War | -0.027 | -0.107 |
| Phones pc                         | ACLP     | Third wave    | 0.325  | 1.839  |
| Phones pc                         | BMR      | all years     | 0.405  | 2.388  |
| Phones pc                         | BMR      | Cold War      | 0.842  | 2.458  |
| Phones pc                         | BMR      | post-Cold War | -0.138 | -0.583 |
| Phones pc                         | BMR      | Third wave    | 0.370  | 2.068  |
| Phones pc                         | PolityIV | all years     | 0.680  | 3.805  |
| Phones pc                         | PolityIV | Cold War      | 0.965  | 2.465  |
| Phones pc                         | PolityIV | post-Cold War | 0.198  | 0.915  |
| Phones pc                         | PolityIV | Third wave    | 0.640  | 3.573  |
| Phones pc                         | V-Dem    | all years     | 0.771  | 4.520  |
| Phones pc                         | V-Dem    | Cold War      | 1.389  | 3.954  |
| Phones pc                         | V-Dem    | post-Cold War | 0.082  | 0.402  |
| Phones pc                         | V-Dem    | Third wave    | 0.610  | 3.636  |
| Agriculture's share of economy, % | ACLP     | all years     | 0.410  | 3.073  |
| Agriculture's share of economy, % | ACLP     | Cold War      | 0.405  | 2.014  |
| Agriculture's share of economy, % | ACLP     | post-Cold War | 0.378  | 2.067  |
| Agriculture's share of economy, % | ACLP     | Third wave    | 0.319  | 2.300  |
| Agriculture's share of economy, % | BMR      | all years     | 0.324  | 2.460  |
| Agriculture's share of economy, % | BMR      | Cold War      | 0.280  | 1.259  |
| Agriculture's share of economy, % | BMR      | post-Cold War | 0.289  | 1.502  |
| Agriculture's share of economy, % | BMR      | Third wave    | 0.284  | 1.955  |
| Agriculture's share of economy, % | PolityIV | all years     | 0.102  | 0.632  |
| Agriculture's share of economy, % | PolityIV | Cold War      | 0.225  | 0.843  |
| Agriculture's share of economy, % | PolityIV | post-Cold War | -0.050 | -0.216 |
| Agriculture's share of economy, % | PolityIV | Third wave    | 0.003  | 0.017  |
| Agriculture's share of economy, % | V-Dem    | all years     | 0.166  | 1.131  |
| Agriculture's share of economy, % | V-Dem    | Cold War      | 0.115  | 0.455  |
| Agriculture's share of economy, % | V-Dem    | post-Cold War | 0.114  | 0.618  |
| Agriculture's share of economy, % | V-Dem    | Third wave    | 0.092  | 0.597  |
| Industry's share of economy, %    | ACLP     | all years     | -0.426 | -3.586 |
| Industry's share of economy, %    | ACLP     | Cold War      | -0.498 | -3.008 |
| Industry's share of economy, %    | ACLP     | post-Cold War | -0.268 | -1.715 |
| Industry's share of economy, %    | ACLP     | Third wave    | -0.354 | -2.844 |
| Industry's share of economy, %    | BMR      | all years     | -0.537 | -4.015 |
| Industry's share of economy, %    | BMR      | Cold War      | -0.439 | -2.657 |
| Industry's share of economy, %    | BMR      | post-Cold War | -0.544 | -2.821 |
| Industry's share of economy, %    | BMR      | Third wave    | -0.476 | -3.377 |
| Industry's share of economy, %    | PolityIV | all years     | -0.453 | -3.703 |
| Industry's share of economy, %    | PolityIV | Cold War      | -0.354 | -1.740 |
| Industry's share of economy, %    | PolityIV | post-Cold War | -0.393 | -2.399 |
| Industry's share of economy, %    | PolityIV | Third wave    | -0.421 | -3.308 |
| Industry's share of economy, %    | V-Dem    | all years     | -0.654 | -5.412 |
| Industry's share of economy, %    | V-Dem    | Cold War      | -0.657 | -3.256 |
| Industry's share of economy, %    | V-Dem    | post-Cold War | -0.532 | -3.322 |
| Industry's share of economy, %    | V-Dem    | Third wave    | -0.561 | -4.460 |
| Energy consumption pc             | ACLP     | all years     | -0.568 | -5.867 |
| Energy consumption pc             | ACLP     | Cold War      | -0.561 | -4.520 |
| Energy consumption pc             | ACLP     | post-Cold War | -0.554 | -3.699 |
| Energy consumption pc             | ACLP     | Third wave    | -0.518 | -4.001 |
| Energy consumption pc             | BMR      | all years     | -0.330 | -2.503 |
| Energy consumption pc             | BMR      | Cold War      | -0.278 | -1.277 |

|                                 |          |               |        |        |
|---------------------------------|----------|---------------|--------|--------|
| Energy consumption pc           | BMR      | post-Cold War | -0.290 | -1.379 |
| Energy consumption pc           | BMR      | Third wave    | -0.208 | -1.198 |
| Energy consumption pc           | PolityIV | all years     | -0.541 | -4.676 |
| Energy consumption pc           | PolityIV | Cold War      | -0.603 | -2.941 |
| Energy consumption pc           | PolityIV | post-Cold War | -0.407 | -1.743 |
| Energy consumption pc           | PolityIV | Third wave    | -0.443 | -2.709 |
| Energy consumption pc           | V-Dem    | all years     | -0.491 | -3.744 |
| Energy consumption pc           | V-Dem    | Cold War      | -0.413 | -2.207 |
| Energy consumption pc           | V-Dem    | post-Cold War | -0.404 | -2.392 |
| Energy consumption pc           | V-Dem    | Third wave    | -0.440 | -3.070 |
| Urban population, %             | ACLP     | all years     | -0.202 | -1.005 |
| Urban population, %             | ACLP     | Cold War      | 0.092  | 0.407  |
| Urban population, %             | ACLP     | post-Cold War | -0.633 | -2.021 |
| Urban population, %             | ACLP     | Third wave    | -0.218 | -1.131 |
| Urban population, %             | BMR      | all years     | -0.057 | -0.319 |
| Urban population, %             | BMR      | Cold War      | 0.362  | 1.672  |
| Urban population, %             | BMR      | post-Cold War | -0.521 | -2.135 |
| Urban population, %             | BMR      | Third wave    | -0.127 | -0.708 |
| Urban population, %             | PolityIV | all years     | -0.098 | -0.479 |
| Urban population, %             | PolityIV | Cold War      | 0.397  | 1.378  |
| Urban population, %             | PolityIV | post-Cold War | -0.435 | -1.677 |
| Urban population, %             | PolityIV | Third wave    | -0.067 | -0.324 |
| Urban population, %             | V-Dem    | all years     | -0.229 | -1.366 |
| Urban population, %             | V-Dem    | Cold War      | 0.302  | 1.030  |
| Urban population, %             | V-Dem    | post-Cold War | -0.454 | -2.199 |
| Urban population, %             | V-Dem    | Third wave    | -0.126 | -0.794 |
| School enrollment, primary, %   | ACLP     | all years     | 0.053  | 0.485  |
| School enrollment, primary, %   | ACLP     | Cold War      | 0.064  | 0.460  |
| School enrollment, primary, %   | ACLP     | post-Cold War | -0.040 | -0.240 |
| School enrollment, primary, %   | ACLP     | Third wave    | 0.078  | 0.710  |
| School enrollment, primary, %   | BMR      | all years     | -0.022 | -0.211 |
| School enrollment, primary, %   | BMR      | Cold War      | -0.053 | -0.377 |
| School enrollment, primary, %   | BMR      | post-Cold War | -0.082 | -0.468 |
| School enrollment, primary, %   | BMR      | Third wave    | 0.020  | 0.176  |
| School enrollment, primary, %   | PolityIV | all years     | 0.174  | 1.520  |
| School enrollment, primary, %   | PolityIV | Cold War      | 0.041  | 0.225  |
| School enrollment, primary, %   | PolityIV | post-Cold War | 0.188  | 1.211  |
| School enrollment, primary, %   | PolityIV | Third wave    | 0.204  | 1.848  |
| School enrollment, primary, %   | V-Dem    | all years     | 0.185  | 1.601  |
| School enrollment, primary, %   | V-Dem    | Cold War      | 0.132  | 0.694  |
| School enrollment, primary, %   | V-Dem    | post-Cold War | 0.114  | 0.765  |
| School enrollment, primary, %   | V-Dem    | Third wave    | 0.176  | 1.585  |
| School enrollment, secondary, % | ACLP     | all years     | 0.109  | 0.641  |
| School enrollment, secondary, % | ACLP     | Cold War      | 0.280  | 1.195  |
| School enrollment, secondary, % | ACLP     | post-Cold War | -0.148 | -0.655 |
| School enrollment, secondary, % | ACLP     | Third wave    | 0.174  | 1.060  |
| School enrollment, secondary, % | BMR      | all years     | 0.182  | 1.097  |
| School enrollment, secondary, % | BMR      | Cold War      | 0.378  | 1.592  |
| School enrollment, secondary, % | BMR      | post-Cold War | -0.051 | -0.215 |
| School enrollment, secondary, % | BMR      | Third wave    | 0.219  | 1.274  |
| School enrollment, secondary, % | PolityIV | all years     | 0.242  | 1.425  |
| School enrollment, secondary, % | PolityIV | Cold War      | 0.278  | 1.065  |
| School enrollment, secondary, % | PolityIV | post-Cold War | 0.009  | 0.043  |
| School enrollment, secondary, % | PolityIV | Third wave    | 0.282  | 1.698  |

|                                    |          |               |        |        |
|------------------------------------|----------|---------------|--------|--------|
| School enrollment, secondary, %    | V-Dem    | all years     | 0.212  | 1.363  |
| School enrollment, secondary, %    | V-Dem    | Cold War      | 0.458  | 1.745  |
| School enrollment, secondary, %    | V-Dem    | post-Cold War | -0.110 | -0.582 |
| School enrollment, secondary, %    | V-Dem    | Third wave    | 0.209  | 1.362  |
| Average years of education, female | ACLP     | all years     | 0.342  | 2.316  |
| Average years of education, female | ACLP     | Cold War      | 0.737  | 3.627  |
| Average years of education, female | ACLP     | post-Cold War | -0.166 | -0.779 |
| Average years of education, female | ACLP     | Third wave    | 0.308  | 2.145  |
| Average years of education, female | BMR      | all years     | 0.364  | 2.479  |
| Average years of education, female | BMR      | Cold War      | 0.650  | 2.756  |
| Average years of education, female | BMR      | post-Cold War | -0.023 | -0.109 |
| Average years of education, female | BMR      | Third wave    | 0.366  | 2.401  |
| Average years of education, female | PolityIV | all years     | 0.632  | 3.826  |
| Average years of education, female | PolityIV | Cold War      | 0.691  | 2.546  |
| Average years of education, female | PolityIV | post-Cold War | 0.290  | 1.353  |
| Average years of education, female | PolityIV | Third wave    | 0.602  | 3.754  |
| Average years of education, female | V-Dem    | all years     | 0.494  | 3.302  |
| Average years of education, female | V-Dem    | Cold War      | 0.771  | 2.510  |
| Average years of education, female | V-Dem    | post-Cold War | 0.044  | 0.246  |
| Average years of education, female | V-Dem    | Third wave    | 0.409  | 2.834  |
| Average years of education, male   | ACLP     | all years     | 0.306  | 2.101  |
| Average years of education, male   | ACLP     | Cold War      | 0.716  | 3.642  |
| Average years of education, male   | ACLP     | post-Cold War | -0.350 | -1.498 |
| Average years of education, male   | ACLP     | Third wave    | 0.242  | 1.633  |
| Average years of education, male   | BMR      | all years     | 0.315  | 2.143  |
| Average years of education, male   | BMR      | Cold War      | 0.622  | 2.730  |
| Average years of education, male   | BMR      | post-Cold War | -0.177 | -0.795 |
| Average years of education, male   | BMR      | Third wave    | 0.309  | 1.928  |
| Average years of education, male   | PolityIV | all years     | 0.516  | 3.091  |
| Average years of education, male   | PolityIV | Cold War      | 0.667  | 2.703  |
| Average years of education, male   | PolityIV | post-Cold War | 0.056  | 0.242  |
| Average years of education, male   | PolityIV | Third wave    | 0.453  | 2.667  |
| Average years of education, male   | V-Dem    | all years     | 0.457  | 2.756  |
| Average years of education, male   | V-Dem    | Cold War      | 0.609  | 1.907  |
| Average years of education, male   | V-Dem    | post-Cold War | -0.082 | -0.399 |
| Average years of education, male   | V-Dem    | Third wave    | 0.334  | 2.066  |
| Oil rents, % GDP                   | ACLP     | all years     | -1.095 | -3.861 |
| Oil rents, % GDP                   | ACLP     | Cold War      | -1.208 | -2.759 |
| Oil rents, % GDP                   | ACLP     | post-Cold War | -0.697 | -3.140 |
| Oil rents, % GDP                   | ACLP     | Third wave    | -0.926 | -3.647 |
| Oil rents, % GDP                   | BMR      | all years     | -1.159 | -4.193 |
| Oil rents, % GDP                   | BMR      | Cold War      | -0.838 | -2.941 |
| Oil rents, % GDP                   | BMR      | post-Cold War | -1.170 | -3.920 |
| Oil rents, % GDP                   | BMR      | Third wave    | -1.099 | -4.022 |
| Oil rents, % GDP                   | PolityIV | all years     | -1.291 | -2.997 |
| Oil rents, % GDP                   | PolityIV | Cold War      | -1.146 | -2.420 |
| Oil rents, % GDP                   | PolityIV | post-Cold War | -1.046 | -2.076 |
| Oil rents, % GDP                   | PolityIV | Third wave    | -1.136 | -2.712 |
| Oil rents, % GDP                   | V-Dem    | all years     | -1.283 | -3.081 |
| Oil rents, % GDP                   | V-Dem    | Cold War      | -1.176 | -2.891 |
| Oil rents, % GDP                   | V-Dem    | post-Cold War | -0.961 | -2.287 |
| Oil rents, % GDP                   | V-Dem    | Third wave    | -1.158 | -2.637 |
| Resource rents, % GDP              | ACLP     | all years     | -0.487 | -3.376 |
| Resource rents, % GDP              | ACLP     | Cold War      | -1.061 | -2.679 |

|                       |          |               |        |        |
|-----------------------|----------|---------------|--------|--------|
| Resource rents, % GDP | ACLP     | post-Cold War | -0.246 | -2.063 |
| Resource rents, % GDP | ACLP     | Third wave    | -0.413 | -3.123 |
| Resource rents, % GDP | BMR      | all years     | -0.570 | -3.374 |
| Resource rents, % GDP | BMR      | Cold War      | -0.814 | -2.840 |
| Resource rents, % GDP | BMR      | post-Cold War | -0.444 | -2.277 |
| Resource rents, % GDP | BMR      | Third wave    | -0.477 | -2.883 |
| Resource rents, % GDP | PolityIV | all years     | -0.742 | -3.820 |
| Resource rents, % GDP | PolityIV | Cold War      | -1.150 | -2.397 |
| Resource rents, % GDP | PolityIV | post-Cold War | -0.606 | -2.843 |
| Resource rents, % GDP | PolityIV | Third wave    | -0.684 | -3.562 |
| Resource rents, % GDP | V-Dem    | all years     | -0.700 | -4.548 |
| Resource rents, % GDP | V-Dem    | Cold War      | -0.979 | -3.526 |
| Resource rents, % GDP | V-Dem    | post-Cold War | -0.609 | -3.442 |
| Resource rents, % GDP | V-Dem    | Third wave    | -0.659 | -4.105 |
| Oil/gas value pc      | ACLP     | all years     | -0.375 | -2.647 |
| Oil/gas value pc      | ACLP     | Cold War      | -0.382 | -2.063 |
| Oil/gas value pc      | ACLP     | post-Cold War | -0.298 | -1.740 |
| Oil/gas value pc      | ACLP     | Third wave    | -0.353 | -2.498 |
| Oil/gas value pc      | BMR      | all years     | -0.284 | -1.985 |
| Oil/gas value pc      | BMR      | Cold War      | -0.123 | -0.623 |
| Oil/gas value pc      | BMR      | post-Cold War | -0.371 | -2.157 |
| Oil/gas value pc      | BMR      | Third wave    | -0.304 | -2.138 |
| Oil/gas value pc      | PolityIV | all years     | -0.542 | -3.613 |
| Oil/gas value pc      | PolityIV | Cold War      | -0.404 | -1.863 |
| Oil/gas value pc      | PolityIV | post-Cold War | -0.582 | -3.354 |
| Oil/gas value pc      | PolityIV | Third wave    | -0.528 | -3.609 |
| Oil/gas value pc      | V-Dem    | all years     | -0.625 | -4.455 |
| Oil/gas value pc      | V-Dem    | Cold War      | -0.435 | -1.875 |
| Oil/gas value pc      | V-Dem    | post-Cold War | -0.669 | -4.483 |
| Oil/gas value pc      | V-Dem    | Third wave    | -0.587 | -4.506 |
| Wage share            | ACLP     | all years     | -0.272 | -1.860 |
| Wage share            | ACLP     | Cold War      | -0.417 | -2.082 |
| Wage share            | ACLP     | post-Cold War | -0.038 | -0.187 |
| Wage share            | ACLP     | Third wave    | -0.191 | -1.265 |
| Wage share            | BMR      | all years     | -0.129 | -1.032 |
| Wage share            | BMR      | Cold War      | -0.379 | -1.876 |
| Wage share            | BMR      | post-Cold War | 0.211  | 1.447  |
| Wage share            | BMR      | Third wave    | -0.047 | -0.352 |
| Wage share            | PolityIV | all years     | -0.169 | -1.155 |
| Wage share            | PolityIV | Cold War      | -0.315 | -1.311 |
| Wage share            | PolityIV | post-Cold War | 0.055  | 0.350  |
| Wage share            | PolityIV | Third wave    | -0.123 | -0.814 |
| Wage share            | V-Dem    | all years     | 0.034  | 0.344  |
| Wage share            | V-Dem    | Cold War      | -0.008 | -0.037 |
| Wage share            | V-Dem    | post-Cold War | 0.178  | 1.881  |
| Wage share            | V-Dem    | Third wave    | 0.080  | 0.860  |
| Family farms          | ACLP     | all years     | 0.139  | 1.477  |
| Family farms          | ACLP     | Cold War      | 0.145  | 1.134  |
| Family farms          | ACLP     | post-Cold War | 0.146  | 0.990  |
| Family farms          | ACLP     | Third wave    | 0.130  | 1.301  |
| Family farms          | BMR      | all years     | 0.049  | 0.453  |
| Family farms          | BMR      | Cold War      | -0.007 | -0.044 |
| Family farms          | BMR      | post-Cold War | 0.110  | 0.686  |
| Family farms          | BMR      | Third wave    | 0.075  | 0.654  |

|               |          |               |        |        |
|---------------|----------|---------------|--------|--------|
| Family farms  | PolityIV | all years     | 0.182  | 1.863  |
| Family farms  | PolityIV | Cold War      | 0.205  | 1.282  |
| Family farms  | PolityIV | post-Cold War | 0.169  | 1.147  |
| Family farms  | PolityIV | Third wave    | 0.189  | 1.831  |
| Family farms  | V-Dem    | all years     | 0.204  | 2.378  |
| Family farms  | V-Dem    | Cold War      | 0.434  | 2.787  |
| Family farms  | V-Dem    | post-Cold War | 0.104  | 0.784  |
| Family farms  | V-Dem    | Third wave    | 0.163  | 1.811  |
| GINI market   | ACLP     | all years     | 0.308  | 2.214  |
| GINI market   | ACLP     | Cold War      | 0.071  | 0.431  |
| GINI market   | ACLP     | post-Cold War | 0.416  | 2.038  |
| GINI market   | ACLP     | Third wave    | 0.369  | 2.606  |
| GINI market   | BMR      | all years     | 0.141  | 1.104  |
| GINI market   | BMR      | Cold War      | -0.127 | -0.681 |
| GINI market   | BMR      | post-Cold War | 0.179  | 0.945  |
| GINI market   | BMR      | Third wave    | 0.218  | 1.688  |
| GINI market   | PolityIV | all years     | 0.336  | 2.684  |
| GINI market   | PolityIV | Cold War      | 0.100  | 0.503  |
| GINI market   | PolityIV | post-Cold War | 0.306  | 1.648  |
| GINI market   | PolityIV | Third wave    | 0.320  | 2.576  |
| GINI market   | V-Dem    | all years     | 0.286  | 2.516  |
| GINI market   | V-Dem    | Cold War      | 0.089  | 0.476  |
| GINI market   | V-Dem    | post-Cold War | 0.156  | 1.109  |
| GINI market   | V-Dem    | Third wave    | 0.267  | 2.468  |
| Growth, % GDP | ACLP     | all years     | -0.193 | -2.746 |
| Growth, % GDP | ACLP     | Cold War      | -0.322 | -2.643 |
| Growth, % GDP | ACLP     | post-Cold War | -0.018 | -0.194 |
| Growth, % GDP | ACLP     | Third wave    | -0.129 | -1.703 |
| Growth, % GDP | BMR      | all years     | -0.125 | -1.793 |
| Growth, % GDP | BMR      | Cold War      | -0.214 | -1.657 |
| Growth, % GDP | BMR      | post-Cold War | 0.001  | 0.013  |
| Growth, % GDP | BMR      | Third wave    | -0.069 | -0.958 |
| Growth, % GDP | PolityIV | all years     | -0.227 | -3.013 |
| Growth, % GDP | PolityIV | Cold War      | -0.349 | -2.455 |
| Growth, % GDP | PolityIV | post-Cold War | -0.099 | -1.016 |
| Growth, % GDP | PolityIV | Third wave    | -0.193 | -2.474 |
| Growth, % GDP | V-Dem    | all years     | -0.032 | -0.220 |
| Growth, % GDP | V-Dem    | Cold War      | -0.252 | -1.985 |
| Growth, % GDP | V-Dem    | post-Cold War | 0.079  | 0.734  |
| Growth, % GDP | V-Dem    | Third wave    | 0.022  | 0.165  |
| Inflation, %  | ACLP     | all years     | -0.004 | -0.050 |
| Inflation, %  | ACLP     | Cold War      | 0.230  | 2.155  |
| Inflation, %  | ACLP     | post-Cold War | -0.327 | -2.230 |
| Inflation, %  | ACLP     | Third wave    | -0.066 | -0.750 |
| Inflation, %  | BMR      | all years     | 0.050  | 0.677  |
| Inflation, %  | BMR      | Cold War      | 0.210  | 1.770  |
| Inflation, %  | BMR      | post-Cold War | -0.120 | -0.895 |
| Inflation, %  | BMR      | Third wave    | 0.010  | 0.122  |
| Inflation, %  | PolityIV | all years     | 0.183  | 2.362  |
| Inflation, %  | PolityIV | Cold War      | 0.230  | 1.616  |
| Inflation, %  | PolityIV | post-Cold War | 0.095  | 1.004  |
| Inflation, %  | PolityIV | Third wave    | 0.146  | 1.776  |
| Inflation, %  | V-Dem    | all years     | 0.139  | 1.689  |
| Inflation, %  | V-Dem    | Cold War      | 0.392  | 2.502  |

|                           |          |               |        |        |
|---------------------------|----------|---------------|--------|--------|
| Inflation, %              | V-Dem    | post-Cold War | -0.018 | -0.143 |
| Inflation, %              | V-Dem    | Third wave    | 0.079  | 0.832  |
| Trade, % GDP              | ACLP     | all years     | -0.331 | -2.376 |
| Trade, % GDP              | ACLP     | Cold War      | -0.895 | -4.161 |
| Trade, % GDP              | ACLP     | post-Cold War | -0.007 | -0.049 |
| Trade, % GDP              | ACLP     | Third wave    | -0.275 | -2.097 |
| Trade, % GDP              | BMR      | all years     | -0.402 | -2.502 |
| Trade, % GDP              | BMR      | Cold War      | -0.930 | -4.370 |
| Trade, % GDP              | BMR      | post-Cold War | -0.099 | -0.492 |
| Trade, % GDP              | BMR      | Third wave    | -0.331 | -2.039 |
| Trade, % GDP              | PolityIV | all years     | -0.166 | -1.203 |
| Trade, % GDP              | PolityIV | Cold War      | -0.871 | -3.132 |
| Trade, % GDP              | PolityIV | post-Cold War | 0.065  | 0.434  |
| Trade, % GDP              | PolityIV | Third wave    | -0.117 | -0.875 |
| Trade, % GDP              | V-Dem    | all years     | -0.131 | -1.095 |
| Trade, % GDP              | V-Dem    | Cold War      | -0.480 | -1.697 |
| Trade, % GDP              | V-Dem    | post-Cold War | -0.073 | -0.545 |
| Trade, % GDP              | V-Dem    | Third wave    | -0.154 | -1.318 |
| Investment, % GDP         | ACLP     | all years     | -0.023 | -0.240 |
| Investment, % GDP         | ACLP     | Cold War      | -0.095 | -0.750 |
| Investment, % GDP         | ACLP     | post-Cold War | 0.155  | 1.166  |
| Investment, % GDP         | ACLP     | Third wave    | -0.014 | -0.138 |
| Investment, % GDP         | BMR      | all years     | -0.075 | -0.808 |
| Investment, % GDP         | BMR      | Cold War      | -0.136 | -1.075 |
| Investment, % GDP         | BMR      | post-Cold War | 0.135  | 1.023  |
| Investment, % GDP         | BMR      | Third wave    | -0.054 | -0.539 |
| Investment, % GDP         | PolityIV | all years     | -0.058 | -0.538 |
| Investment, % GDP         | PolityIV | Cold War      | -0.378 | -2.213 |
| Investment, % GDP         | PolityIV | post-Cold War | 0.250  | 1.836  |
| Investment, % GDP         | PolityIV | Third wave    | -0.015 | -0.139 |
| Investment, % GDP         | V-Dem    | all years     | -0.121 | -1.331 |
| Investment, % GDP         | V-Dem    | Cold War      | -0.320 | -1.940 |
| Investment, % GDP         | V-Dem    | post-Cold War | 0.140  | 1.241  |
| Investment, % GDP         | V-Dem    | Third wave    | -0.094 | -1.058 |
| Federal system            | ACLP     | all years     | -0.088 | -0.318 |
| Federal system            | ACLP     | Cold War      | -0.201 | -0.482 |
| Federal system            | ACLP     | post-Cold War | 0.219  | 0.585  |
| Federal system            | ACLP     | Third wave    | 0.048  | 0.182  |
| Federal system            | BMR      | all years     | 0.236  | 0.915  |
| Federal system            | BMR      | Cold War      | 0.095  | 0.246  |
| Federal system            | BMR      | post-Cold War | 0.449  | 1.381  |
| Federal system            | BMR      | Third wave    | 0.339  | 1.309  |
| Federal system            | PolityIV | all years     | 0.256  | 1.037  |
| Federal system            | PolityIV | Cold War      | 0.074  | 0.168  |
| Federal system            | PolityIV | post-Cold War | 0.501  | 1.531  |
| Federal system            | PolityIV | Third wave    | 0.306  | 1.183  |
| Federal system            | V-Dem    | all years     | 0.147  | 0.568  |
| Federal system            | V-Dem    | Cold War      | 0.112  | 0.258  |
| Federal system            | V-Dem    | post-Cold War | 0.235  | 0.777  |
| Federal system            | V-Dem    | Third wave    | 0.185  | 0.713  |
| Plurality/majority system | ACLP     | all years     | -0.928 | -4.361 |
| Plurality/majority system | ACLP     | Cold War      | -0.981 | -3.379 |
| Plurality/majority system | ACLP     | post-Cold War | -0.760 | -2.796 |
| Plurality/majority system | ACLP     | Third wave    | -0.874 | -3.992 |

|                           |          |               |        |        |
|---------------------------|----------|---------------|--------|--------|
| Plurality/majority system | BMR      | all years     | -0.811 | -3.657 |
| Plurality/majority system | BMR      | Cold War      | -0.689 | -2.113 |
| Plurality/majority system | BMR      | post-Cold War | -0.859 | -3.051 |
| Plurality/majority system | BMR      | Third wave    | -0.859 | -3.743 |
| Plurality/majority system | PolityIV | all years     | -1.071 | -4.654 |
| Plurality/majority system | PolityIV | Cold War      | -1.328 | -3.414 |
| Plurality/majority system | PolityIV | post-Cold War | -0.819 | -3.053 |
| Plurality/majority system | PolityIV | Third wave    | -1.070 | -4.689 |
| Plurality/majority system | V-Dem    | all years     | -0.952 | -4.277 |
| Plurality/majority system | V-Dem    | Cold War      | -0.851 | -2.088 |
| Plurality/majority system | V-Dem    | post-Cold War | -0.874 | -3.335 |
| Plurality/majority system | V-Dem    | Third wave    | -0.950 | -4.405 |
| Presidential system       | ACLP     | all years     | 0.150  | 0.643  |
| Presidential system       | ACLP     | Cold War      | 0.538  | 1.734  |
| Presidential system       | ACLP     | post-Cold War | -0.276 | -0.760 |
| Presidential system       | ACLP     | Third wave    | 0.029  | 0.117  |
| Presidential system       | BMR      | all years     | -0.261 | -1.198 |
| Presidential system       | BMR      | Cold War      | 0.398  | 1.161  |
| Presidential system       | BMR      | post-Cold War | -0.963 | -3.189 |
| Presidential system       | BMR      | Third wave    | -0.435 | -1.903 |
| Presidential system       | PolityIV | all years     | -0.111 | -0.484 |
| Presidential system       | PolityIV | Cold War      | 0.428  | 1.122  |
| Presidential system       | PolityIV | post-Cold War | -0.594 | -1.895 |
| Presidential system       | PolityIV | Third wave    | -0.161 | -0.684 |
| Presidential system       | V-Dem    | all years     | -0.242 | -1.134 |
| Presidential system       | V-Dem    | Cold War      | 0.198  | 0.500  |
| Presidential system       | V-Dem    | post-Cold War | -0.614 | -2.366 |
| Presidential system       | V-Dem    | Third wave    | -0.344 | -1.668 |
| Excluded population, %    | ACLP     | all years     | 0.292  | 2.423  |
| Excluded population, %    | ACLP     | Cold War      | 0.304  | 1.863  |
| Excluded population, %    | ACLP     | post-Cold War | 0.278  | 1.380  |
| Excluded population, %    | ACLP     | Third wave    | 0.344  | 2.737  |
| Excluded population, %    | BMR      | all years     | 0.265  | 2.383  |
| Excluded population, %    | BMR      | Cold War      | 0.251  | 1.608  |
| Excluded population, %    | BMR      | post-Cold War | 0.286  | 1.643  |
| Excluded population, %    | BMR      | Third wave    | 0.310  | 2.656  |
| Excluded population, %    | PolityIV | all years     | 0.226  | 1.679  |
| Excluded population, %    | PolityIV | Cold War      | 0.172  | 0.820  |
| Excluded population, %    | PolityIV | post-Cold War | 0.236  | 1.428  |
| Excluded population, %    | PolityIV | Third wave    | 0.244  | 1.859  |
| Excluded population, %    | V-Dem    | all years     | 0.218  | 1.615  |
| Excluded population, %    | V-Dem    | Cold War      | 0.211  | 0.988  |
| Excluded population, %    | V-Dem    | post-Cold War | 0.168  | 1.026  |
| Excluded population, %    | V-Dem    | Third wave    | 0.196  | 1.524  |
| Included population, %    | ACLP     | all years     | -0.082 | -0.743 |
| Included population, %    | ACLP     | Cold War      | -0.025 | -0.170 |
| Included population, %    | ACLP     | post-Cold War | -0.157 | -0.863 |
| Included population, %    | ACLP     | Third wave    | -0.124 | -1.052 |
| Included population, %    | BMR      | all years     | 0.006  | 0.065  |
| Included population, %    | BMR      | Cold War      | 0.081  | 0.571  |
| Included population, %    | BMR      | post-Cold War | -0.049 | -0.292 |
| Included population, %    | BMR      | Third wave    | -0.049 | -0.467 |
| Included population, %    | PolityIV | all years     | -0.231 | -2.044 |
| Included population, %    | PolityIV | Cold War      | -0.129 | -0.657 |



|                           |          |               |        |        |
|---------------------------|----------|---------------|--------|--------|
| Included population, %    | PolityIV | post-Cold War | -0.276 | -1.664 |
| Included population, %    | PolityIV | Third wave    | -0.252 | -2.233 |
| Included population, %    | V-Dem    | all years     | -0.255 | -2.292 |
| Included population, %    | V-Dem    | Cold War      | -0.468 | -2.336 |
| Included population, %    | V-Dem    | post-Cold War | -0.131 | -0.909 |
| Included population, %    | V-Dem    | Third wave    | -0.219 | -1.954 |
| Largest excluded group, % | ACLP     | all years     | -0.113 | -1.019 |
| Largest excluded group, % | ACLP     | Cold War      | -0.103 | -0.744 |
| Largest excluded group, % | ACLP     | post-Cold War | -0.115 | -0.612 |
| Largest excluded group, % | ACLP     | Third wave    | -0.141 | -1.197 |
| Largest excluded group, % | BMR      | all years     | -0.031 | -0.301 |
| Largest excluded group, % | BMR      | Cold War      | -0.012 | -0.078 |
| Largest excluded group, % | BMR      | post-Cold War | 0.010  | 0.059  |
| Largest excluded group, % | BMR      | Third wave    | -0.071 | -0.665 |
| Largest excluded group, % | PolityIV | all years     | -0.236 | -2.085 |
| Largest excluded group, % | PolityIV | Cold War      | -0.241 | -1.550 |
| Largest excluded group, % | PolityIV | post-Cold War | -0.188 | -1.044 |
| Largest excluded group, % | PolityIV | Third wave    | -0.230 | -1.864 |
| Largest excluded group, % | V-Dem    | all years     | -0.237 | -2.165 |
| Largest excluded group, % | V-Dem    | Cold War      | -0.421 | -2.154 |
| Largest excluded group, % | V-Dem    | post-Cold War | -0.090 | -0.609 |
| Largest excluded group, % | V-Dem    | Third wave    | -0.206 | -1.836 |
| Former colony             | ACLP     | all years     | -0.126 | -0.453 |
| Former colony             | ACLP     | Cold War      | -0.248 | -0.707 |
| Former colony             | ACLP     | post-Cold War | 0.210  | 0.520  |
| Former colony             | ACLP     | Third wave    | -0.309 | -1.050 |
| Former colony             | BMR      | all years     | -0.363 | -1.470 |
| Former colony             | BMR      | Cold War      | -0.320 | -0.929 |
| Former colony             | BMR      | post-Cold War | -0.340 | -0.910 |
| Former colony             | BMR      | Third wave    | -0.575 | -2.213 |
| Former colony             | PolityIV | all years     | -0.177 | -0.687 |
| Former colony             | PolityIV | Cold War      | -0.140 | -0.276 |
| Former colony             | PolityIV | post-Cold War | -0.080 | -0.229 |
| Former colony             | PolityIV | Third wave    | -0.199 | -0.776 |
| Former colony             | V-Dem    | all years     | 0.001  | 0.003  |
| Former colony             | V-Dem    | Cold War      | 0.303  | 0.742  |
| Former colony             | V-Dem    | post-Cold War | -0.058 | -0.205 |
| Former colony             | V-Dem    | Third wave    | -0.141 | -0.634 |
| British colony            | ACLP     | all years     | -0.326 | -1.222 |
| British colony            | ACLP     | Cold War      | -0.316 | -0.779 |
| British colony            | ACLP     | post-Cold War | -0.233 | -0.665 |
| British colony            | ACLP     | Third wave    | -0.461 | -1.845 |
| British colony            | BMR      | all years     | -0.258 | -0.966 |
| British colony            | BMR      | Cold War      | -0.187 | -0.432 |
| British colony            | BMR      | post-Cold War | -0.311 | -0.934 |
| British colony            | BMR      | Third wave    | -0.473 | -1.854 |
| British colony            | PolityIV | all years     | 0.004  | 0.013  |
| British colony            | PolityIV | Cold War      | -0.370 | -0.608 |
| British colony            | PolityIV | post-Cold War | 0.073  | 0.232  |
| British colony            | PolityIV | Third wave    | -0.123 | -0.466 |
| British colony            | V-Dem    | all years     | -0.091 | -0.341 |
| British colony            | V-Dem    | Cold War      | -0.041 | -0.079 |
| British colony            | V-Dem    | post-Cold War | -0.142 | -0.483 |
| British colony            | V-Dem    | Third wave    | -0.238 | -0.967 |

|                       |          |               |        |        |
|-----------------------|----------|---------------|--------|--------|
| Spanish colony        | ACLP     | all years     | 0.800  | 2.803  |
| Spanish colony        | ACLP     | Cold War      | 1.123  | 3.405  |
| Spanish colony        | ACLP     | post-Cold War | 0.606  | 1.113  |
| Spanish colony        | ACLP     | Third wave    | 0.778  | 2.648  |
| Spanish colony        | BMR      | all years     | 0.691  | 2.430  |
| Spanish colony        | BMR      | Cold War      | 0.890  | 2.417  |
| Spanish colony        | BMR      | post-Cold War | 0.900  | 1.813  |
| Spanish colony        | BMR      | Third wave    | 0.709  | 2.367  |
| Spanish colony        | PolityIV | all years     | 0.625  | 2.200  |
| Spanish colony        | PolityIV | Cold War      | 1.155  | 2.821  |
| Spanish colony        | PolityIV | post-Cold War | 0.657  | 1.225  |
| Spanish colony        | PolityIV | Third wave    | 0.823  | 2.860  |
| Spanish colony        | V-Dem    | all years     | 0.298  | 1.267  |
| Spanish colony        | V-Dem    | Cold War      | 0.748  | 1.868  |
| Spanish colony        | V-Dem    | post-Cold War | 0.547  | 1.281  |
| Spanish colony        | V-Dem    | Third wave    | 0.417  | 1.721  |
| French colony         | ACLP     | all years     | -0.523 | -1.666 |
| French colony         | ACLP     | Cold War      | -2.082 | -2.719 |
| French colony         | ACLP     | post-Cold War | 0.097  | 0.289  |
| French colony         | ACLP     | Third wave    | -0.377 | -1.228 |
| French colony         | BMR      | all years     | -0.874 | -2.550 |
| French colony         | BMR      | Cold War      | -2.373 | -2.502 |
| French colony         | BMR      | post-Cold War | -0.334 | -0.840 |
| French colony         | BMR      | Third wave    | -0.734 | -1.972 |
| French colony         | PolityIV | all years     | -0.580 | -1.699 |
| French colony         | PolityIV | Cold War      | -2.090 | -2.101 |
| French colony         | PolityIV | post-Cold War | -0.175 | -0.466 |
| French colony         | PolityIV | Third wave    | -0.433 | -1.282 |
| French colony         | V-Dem    | all years     | -0.176 | -0.583 |
| French colony         | V-Dem    | Cold War      | -1.217 | -1.202 |
| French colony         | V-Dem    | post-Cold War | 0.050  | 0.149  |
| French colony         | V-Dem    | Third wave    | -0.094 | -0.318 |
| Political corruption  | ACLP     | all years     | 0.115  | 0.774  |
| Political corruption  | ACLP     | Cold War      | 0.274  | 1.330  |
| Political corruption  | ACLP     | post-Cold War | -0.359 | -1.568 |
| Political corruption  | ACLP     | Third wave    | 0.002  | 0.015  |
| Political corruption  | BMR      | all years     | -0.083 | -0.594 |
| Political corruption  | BMR      | Cold War      | 0.031  | 0.149  |
| Political corruption  | BMR      | post-Cold War | -0.547 | -2.482 |
| Political corruption  | BMR      | Third wave    | -0.164 | -1.183 |
| Political corruption  | PolityIV | all years     | 0.029  | 0.190  |
| Political corruption  | PolityIV | Cold War      | 0.072  | 0.264  |
| Political corruption  | PolityIV | post-Cold War | -0.358 | -1.634 |
| Political corruption  | PolityIV | Third wave    | 0.012  | 0.084  |
| Political corruption  | V-Dem    | all years     | -0.113 | -0.859 |
| Political corruption  | V-Dem    | Cold War      | -0.647 | -2.684 |
| Political corruption  | V-Dem    | post-Cold War | -0.481 | -2.674 |
| Political corruption  | V-Dem    | Third wave    | -0.187 | -1.650 |
| Impartial public adm. | ACLP     | all years     | 0.042  | 0.279  |
| Impartial public adm. | ACLP     | Cold War      | -0.237 | -1.062 |
| Impartial public adm. | ACLP     | post-Cold War | 0.500  | 2.351  |
| Impartial public adm. | ACLP     | Third wave    | 0.104  | 0.696  |
| Impartial public adm. | BMR      | all years     | 0.291  | 1.764  |
| Impartial public adm. | BMR      | Cold War      | -0.029 | -0.109 |

|                            |          |               |        |        |
|----------------------------|----------|---------------|--------|--------|
| Impartial public adm.      | BMR      | post-Cold War | 0.731  | 3.526  |
| Impartial public adm.      | BMR      | Third wave    | 0.347  | 2.127  |
| Impartial public adm.      | PolityIV | all years     | 0.260  | 1.504  |
| Impartial public adm.      | PolityIV | Cold War      | -0.155 | -0.526 |
| Impartial public adm.      | PolityIV | post-Cold War | 0.662  | 2.958  |
| Impartial public adm.      | PolityIV | Third wave    | 0.337  | 1.962  |
| Impartial public adm.      | V-Dem    | all years     | 0.797  | 4.375  |
| Impartial public adm.      | V-Dem    | Cold War      | 0.833  | 2.931  |
| Impartial public adm.      | V-Dem    | post-Cold War | 1.045  | 5.693  |
| Impartial public adm.      | V-Dem    | Third wave    | 0.869  | 5.307  |
| Investment profile index   | ACLP     | all years     | -0.021 | -0.166 |
| Investment profile index   | ACLP     | Cold War      | -0.178 | -1.031 |
| Investment profile index   | ACLP     | post-Cold War | 0.027  | 0.147  |
| Investment profile index   | ACLP     | Third wave    | -0.016 | -0.117 |
| Investment profile index   | BMR      | all years     | 0.010  | 0.079  |
| Investment profile index   | BMR      | Cold War      | -0.101 | -0.565 |
| Investment profile index   | BMR      | post-Cold War | -0.069 | -0.386 |
| Investment profile index   | BMR      | Third wave    | 0.018  | 0.129  |
| Investment profile index   | PolityIV | all years     | 0.059  | 0.415  |
| Investment profile index   | PolityIV | Cold War      | -0.155 | -0.655 |
| Investment profile index   | PolityIV | post-Cold War | -0.002 | -0.009 |
| Investment profile index   | PolityIV | Third wave    | 0.039  | 0.270  |
| Investment profile index   | V-Dem    | all years     | 0.302  | 2.461  |
| Investment profile index   | V-Dem    | Cold War      | 0.159  | 0.692  |
| Investment profile index   | V-Dem    | post-Cold War | 0.064  | 0.467  |
| Investment profile index   | V-Dem    | Third wave    | 0.239  | 1.995  |
| Length of executive tenure | ACLP     | all years     | -0.327 | -3.204 |
| Length of executive tenure | ACLP     | Cold War      | -0.365 | -2.465 |
| Length of executive tenure | ACLP     | post-Cold War | -0.260 | -1.803 |
| Length of executive tenure | ACLP     | Third wave    | -0.298 | -2.777 |
| Length of executive tenure | BMR      | all years     | -0.254 | -2.557 |
| Length of executive tenure | BMR      | Cold War      | -0.438 | -2.772 |
| Length of executive tenure | BMR      | post-Cold War | -0.088 | -0.778 |
| Length of executive tenure | BMR      | Third wave    | -0.243 | -2.372 |
| Length of executive tenure | PolityIV | all years     | -0.409 | -3.446 |
| Length of executive tenure | PolityIV | Cold War      | -0.470 | -2.421 |
| Length of executive tenure | PolityIV | post-Cold War | -0.335 | -2.300 |
| Length of executive tenure | PolityIV | Third wave    | -0.437 | -3.795 |
| Length of executive tenure | V-Dem    | all years     | -0.506 | -4.853 |
| Length of executive tenure | V-Dem    | Cold War      | -0.585 | -3.021 |
| Length of executive tenure | V-Dem    | post-Cold War | -0.463 | -3.813 |
| Length of executive tenure | V-Dem    | Third wave    | -0.499 | -4.796 |
| Previous military regime   | ACLP     | all years     | -0.286 | -2.427 |
| Previous military regime   | ACLP     | Cold War      | -0.441 | -2.962 |
| Previous military regime   | ACLP     | post-Cold War | -0.074 | -0.399 |
| Previous military regime   | ACLP     | Third wave    | -0.242 | -1.945 |
| Previous military regime   | BMR      | all years     | -0.086 | -0.645 |
| Previous military regime   | BMR      | Cold War      | -0.341 | -2.022 |
| Previous military regime   | BMR      | post-Cold War | 0.156  | 0.872  |
| Previous military regime   | BMR      | Third wave    | -0.081 | -0.596 |
| Previous military regime   | PolityIV | all years     | -0.298 | -2.280 |
| Previous military regime   | PolityIV | Cold War      | -0.587 | -3.377 |
| Previous military regime   | PolityIV | post-Cold War | -0.064 | -0.378 |
| Previous military regime   | PolityIV | Third wave    | -0.269 | -2.028 |

|                          |          |               |        |        |
|--------------------------|----------|---------------|--------|--------|
| Previous military regime | V-Dem    | all years     | -0.246 | -1.902 |
| Previous military regime | V-Dem    | Cold War      | -0.336 | -1.533 |
| Previous military regime | V-Dem    | post-Cold War | -0.277 | -2.057 |
| Previous military regime | V-Dem    | Third wave    | -0.238 | -2.024 |
| Time since ILC           | ACLP     | all years     | 0.879  | 3.194  |
| Time since ILC           | ACLP     | Cold War      | 0.897  | 2.642  |
| Time since ILC           | ACLP     | post-Cold War | 0.650  | 1.425  |
| Time since ILC           | ACLP     | Third wave    | 0.719  | 2.338  |
| Time since ILC           | BMR      | all years     | 0.979  | 3.387  |
| Time since ILC           | BMR      | Cold War      | 0.695  | 1.985  |
| Time since ILC           | BMR      | post-Cold War | 0.912  | 2.387  |
| Time since ILC           | BMR      | Third wave    | 0.926  | 2.916  |
| Time since ILC           | PolityIV | all years     | 0.680  | 2.144  |
| Time since ILC           | PolityIV | Cold War      | 1.030  | 2.482  |
| Time since ILC           | PolityIV | post-Cold War | 0.248  | 0.507  |
| Time since ILC           | PolityIV | Third wave    | 0.503  | 1.465  |
| Time since ILC           | V-Dem    | all years     | 0.871  | 3.932  |
| Time since ILC           | V-Dem    | Cold War      | 1.131  | 2.744  |
| Time since ILC           | V-Dem    | post-Cold War | 0.674  | 2.116  |
| Time since ILC           | V-Dem    | Third wave    | 0.701  | 3.193  |
| Assassinations           | ACLP     | all years     | 0.067  | 0.735  |
| Assassinations           | ACLP     | Cold War      | 0.124  | 1.153  |
| Assassinations           | ACLP     | post-Cold War | -0.039 | -0.285 |
| Assassinations           | ACLP     | Third wave    | -0.044 | -0.466 |
| Assassinations           | BMR      | all years     | 0.096  | 1.267  |
| Assassinations           | BMR      | Cold War      | 0.143  | 1.500  |
| Assassinations           | BMR      | post-Cold War | 0.016  | 0.135  |
| Assassinations           | BMR      | Third wave    | -0.004 | -0.050 |
| Assassinations           | PolityIV | all years     | 0.176  | 2.401  |
| Assassinations           | PolityIV | Cold War      | 0.091  | 0.700  |
| Assassinations           | PolityIV | post-Cold War | 0.203  | 2.090  |
| Assassinations           | PolityIV | Third wave    | 0.147  | 1.843  |
| Assassinations           | V-Dem    | all years     | 0.150  | 2.301  |
| Assassinations           | V-Dem    | Cold War      | 0.090  | 0.625  |
| Assassinations           | V-Dem    | post-Cold War | 0.181  | 1.954  |
| Assassinations           | V-Dem    | Third wave    | 0.142  | 2.337  |
| Strikes                  | ACLP     | all years     | 0.367  | 4.786  |
| Strikes                  | ACLP     | Cold War      | 0.366  | 3.816  |
| Strikes                  | ACLP     | post-Cold War | 0.320  | 2.638  |
| Strikes                  | ACLP     | Third wave    | 0.364  | 4.573  |
| Strikes                  | BMR      | all years     | 0.293  | 3.710  |
| Strikes                  | BMR      | Cold War      | 0.303  | 3.075  |
| Strikes                  | BMR      | post-Cold War | 0.270  | 2.226  |
| Strikes                  | BMR      | Third wave    | 0.292  | 3.243  |
| Strikes                  | PolityIV | all years     | 0.256  | 3.490  |
| Strikes                  | PolityIV | Cold War      | 0.329  | 3.232  |
| Strikes                  | PolityIV | post-Cold War | 0.139  | 1.134  |
| Strikes                  | PolityIV | Third wave    | 0.278  | 3.515  |
| Strikes                  | V-Dem    | all years     | 0.117  | 1.305  |
| Strikes                  | V-Dem    | Cold War      | 0.179  | 1.334  |
| Strikes                  | V-Dem    | post-Cold War | 0.072  | 0.592  |
| Strikes                  | V-Dem    | Third wave    | 0.148  | 1.634  |
| Riots                    | ACLP     | all years     | 0.343  | 4.283  |
| Riots                    | ACLP     | Cold War      | 0.397  | 4.241  |

|                     |          |               |        |        |
|---------------------|----------|---------------|--------|--------|
| Riots               | ACLP     | post-Cold War | 0.332  | 2.386  |
| Riots               | ACLP     | Third wave    | 0.341  | 3.930  |
| Riots               | BMR      | all years     | 0.366  | 5.222  |
| Riots               | BMR      | Cold War      | 0.422  | 4.531  |
| Riots               | BMR      | post-Cold War | 0.396  | 4.053  |
| Riots               | BMR      | Third wave    | 0.383  | 5.098  |
| Riots               | PolityIV | all years     | 0.412  | 5.677  |
| Riots               | PolityIV | Cold War      | 0.494  | 4.136  |
| Riots               | PolityIV | post-Cold War | 0.429  | 4.439  |
| Riots               | PolityIV | Third wave    | 0.421  | 5.786  |
| Riots               | V-Dem    | all years     | 0.114  | 1.226  |
| Riots               | V-Dem    | Cold War      | 0.175  | 1.128  |
| Riots               | V-Dem    | post-Cold War | 0.145  | 1.316  |
| Riots               | V-Dem    | Third wave    | 0.195  | 2.081  |
| Demonstrations      | ACLP     | all years     | 0.433  | 5.875  |
| Demonstrations      | ACLP     | Cold War      | 0.507  | 5.176  |
| Demonstrations      | ACLP     | post-Cold War | 0.361  | 2.883  |
| Demonstrations      | ACLP     | Third wave    | 0.428  | 5.620  |
| Demonstrations      | BMR      | all years     | 0.457  | 7.106  |
| Demonstrations      | BMR      | Cold War      | 0.563  | 5.752  |
| Demonstrations      | BMR      | post-Cold War | 0.375  | 4.045  |
| Demonstrations      | BMR      | Third wave    | 0.451  | 6.679  |
| Demonstrations      | PolityIV | all years     | 0.481  | 7.194  |
| Demonstrations      | PolityIV | Cold War      | 0.627  | 5.810  |
| Demonstrations      | PolityIV | post-Cold War | 0.396  | 4.698  |
| Demonstrations      | PolityIV | Third wave    | 0.463  | 6.944  |
| Demonstrations      | V-Dem    | all years     | 0.240  | 3.078  |
| Demonstrations      | V-Dem    | Cold War      | 0.452  | 3.644  |
| Demonstrations      | V-Dem    | post-Cold War | 0.138  | 1.409  |
| Demonstrations      | V-Dem    | Third wave    | 0.265  | 3.497  |
| Nonviolent campaign | ACLP     | all years     | 2.134  | 8.009  |
| Nonviolent campaign | ACLP     | Cold War      | 2.334  | 6.114  |
| Nonviolent campaign | ACLP     | post-Cold War | 1.705  | 4.876  |
| Nonviolent campaign | ACLP     | Third wave    | 2.106  | 7.882  |
| Nonviolent campaign | BMR      | all years     | 2.271  | 8.447  |
| Nonviolent campaign | BMR      | Cold War      | 2.412  | 5.993  |
| Nonviolent campaign | BMR      | post-Cold War | 1.972  | 6.080  |
| Nonviolent campaign | BMR      | Third wave    | 2.278  | 8.433  |
| Nonviolent campaign | PolityIV | all years     | 2.244  | 8.467  |
| Nonviolent campaign | PolityIV | Cold War      | 2.499  | 6.142  |
| Nonviolent campaign | PolityIV | post-Cold War | 1.897  | 5.941  |
| Nonviolent campaign | PolityIV | Third wave    | 2.221  | 8.193  |
| Nonviolent campaign | V-Dem    | all years     | 1.528  | 5.652  |
| Nonviolent campaign | V-Dem    | Cold War      | 1.600  | 3.622  |
| Nonviolent campaign | V-Dem    | post-Cold War | 1.264  | 4.038  |
| Nonviolent campaign | V-Dem    | Third wave    | 1.413  | 5.133  |
| Minor civil war     | ACLP     | all years     | 0.637  | 2.271  |
| Minor civil war     | ACLP     | Cold War      | 1.163  | 2.657  |
| Minor civil war     | ACLP     | post-Cold War | -0.129 | -0.388 |
| Minor civil war     | ACLP     | Third wave    | 0.342  | 1.219  |
| Minor civil war     | BMR      | all years     | 0.373  | 1.311  |
| Minor civil war     | BMR      | Cold War      | 0.518  | 1.003  |
| Minor civil war     | BMR      | post-Cold War | -0.069 | -0.208 |
| Minor civil war     | BMR      | Third wave    | 0.108  | 0.367  |

|                  |          |               |        |        |
|------------------|----------|---------------|--------|--------|
| Minor civil war  | PolityIV | all years     | 0.043  | 0.145  |
| Minor civil war  | PolityIV | Cold War      | -0.553 | -0.706 |
| Minor civil war  | PolityIV | post-Cold War | -0.090 | -0.263 |
| Minor civil war  | PolityIV | Third wave    | -0.026 | -0.093 |
| Minor civil war  | V-Dem    | all years     | 0.179  | 0.684  |
| Minor civil war  | V-Dem    | Cold War      | 0.778  | 1.892  |
| Minor civil war  | V-Dem    | post-Cold War | -0.379 | -1.256 |
| Minor civil war  | V-Dem    | Third wave    | -0.103 | -0.373 |
| Major civil war  | ACLP     | all years     | 0.344  | 0.896  |
| Major civil war  | ACLP     | Cold War      | 1.051  | 2.162  |
| Major civil war  | ACLP     | post-Cold War | -0.973 | -1.221 |
| Major civil war  | ACLP     | Third wave    | -0.157 | -0.352 |
| Major civil war  | BMR      | all years     | 0.288  | 0.728  |
| Major civil war  | BMR      | Cold War      | 0.911  | 1.827  |
| Major civil war  | BMR      | post-Cold War | -0.552 | -0.815 |
| Major civil war  | BMR      | Third wave    | 0.042  | 0.094  |
| Major civil war  | PolityIV | all years     | 0.688  | 2.228  |
| Major civil war  | PolityIV | Cold War      | 0.861  | 1.337  |
| Major civil war  | PolityIV | post-Cold War | 0.389  | 0.847  |
| Major civil war  | PolityIV | Third wave    | 0.524  | 1.555  |
| Major civil war  | V-Dem    | all years     | -0.859 | -1.433 |
| Major civil war  | V-Dem    | Cold War      | 0.168  | 0.222  |
| Major civil war  | V-Dem    | post-Cold War | -1.857 | -1.896 |
| Major civil war  | V-Dem    | Third wave    | -1.037 | -1.775 |
| Ethnic civil war | ACLP     | all years     | 0.545  | 1.951  |
| Ethnic civil war | ACLP     | Cold War      | 1.142  | 3.004  |
| Ethnic civil war | ACLP     | post-Cold War | -0.402 | -0.865 |
| Ethnic civil war | ACLP     | Third wave    | 0.161  | 0.533  |
| Ethnic civil war | BMR      | all years     | 0.629  | 2.548  |
| Ethnic civil war | BMR      | Cold War      | 0.873  | 2.156  |
| Ethnic civil war | BMR      | post-Cold War | 0.146  | 0.414  |
| Ethnic civil war | BMR      | Third wave    | 0.350  | 1.300  |
| Ethnic civil war | PolityIV | all years     | 0.627  | 2.529  |
| Ethnic civil war | PolityIV | Cold War      | 0.320  | 0.494  |
| Ethnic civil war | PolityIV | post-Cold War | 0.408  | 1.263  |
| Ethnic civil war | PolityIV | Third wave    | 0.436  | 1.766  |
| Ethnic civil war | V-Dem    | all years     | -0.067 | -0.226 |
| Ethnic civil war | V-Dem    | Cold War      | 0.707  | 1.306  |
| Ethnic civil war | V-Dem    | post-Cold War | -0.629 | -1.837 |
| Ethnic civil war | V-Dem    | Third wave    | -0.273 | -0.939 |
| Population       | ACLP     | all years     | 0.185  | 1.604  |
| Population       | ACLP     | Cold War      | 0.326  | 2.149  |
| Population       | ACLP     | post-Cold War | -0.085 | -0.493 |
| Population       | ACLP     | Third wave    | 0.112  | 0.960  |
| Population       | BMR      | all years     | 0.151  | 1.241  |
| Population       | BMR      | Cold War      | 0.169  | 1.153  |
| Population       | BMR      | post-Cold War | 0.054  | 0.249  |
| Population       | BMR      | Third wave    | 0.074  | 0.576  |
| Population       | PolityIV | all years     | 0.313  | 2.457  |
| Population       | PolityIV | Cold War      | 0.343  | 2.097  |
| Population       | PolityIV | post-Cold War | 0.213  | 1.238  |
| Population       | PolityIV | Third wave    | 0.267  | 2.137  |
| Population       | V-Dem    | all years     | 0.202  | 1.709  |
| Population       | V-Dem    | Cold War      | 0.206  | 1.182  |

|                               |          |               |        |        |
|-------------------------------|----------|---------------|--------|--------|
| Population                    | V-Dem    | post-Cold War | 0.064  | 0.404  |
| Population                    | V-Dem    | Third wave    | 0.166  | 1.492  |
| Population density            | ACLP     | all years     | 0.218  | 1.775  |
| Population density            | ACLP     | Cold War      | 0.415  | 2.632  |
| Population density            | ACLP     | post-Cold War | -0.120 | -0.686 |
| Population density            | ACLP     | Third wave    | 0.141  | 1.218  |
| Population density            | BMR      | all years     | 0.344  | 2.763  |
| Population density            | BMR      | Cold War      | 0.565  | 3.439  |
| Population density            | BMR      | post-Cold War | 0.049  | 0.291  |
| Population density            | BMR      | Third wave    | 0.252  | 2.112  |
| Population density            | PolityIV | all years     | 0.273  | 2.204  |
| Population density            | PolityIV | Cold War      | 0.493  | 2.464  |
| Population density            | PolityIV | post-Cold War | 0.051  | 0.340  |
| Population density            | PolityIV | Third wave    | 0.218  | 1.892  |
| Population density            | V-Dem    | all years     | 0.111  | 0.983  |
| Population density            | V-Dem    | Cold War      | 0.283  | 1.325  |
| Population density            | V-Dem    | post-Cold War | -0.123 | -0.942 |
| Population density            | V-Dem    | Third wave    | 0.104  | 1.036  |
| Population aged 0-14 years, % | ACLP     | all years     | -0.110 | -0.683 |
| Population aged 0-14 years, % | ACLP     | Cold War      | -0.333 | -1.634 |
| Population aged 0-14 years, % | ACLP     | post-Cold War | -0.092 | -0.355 |
| Population aged 0-14 years, % | ACLP     | Third wave    | -0.250 | -1.444 |
| Population aged 0-14 years, % | BMR      | all years     | -0.296 | -1.850 |
| Population aged 0-14 years, % | BMR      | Cold War      | -0.563 | -2.341 |
| Population aged 0-14 years, % | BMR      | post-Cold War | -0.267 | -1.014 |
| Population aged 0-14 years, % | BMR      | Third wave    | -0.373 | -2.149 |
| Population aged 0-14 years, % | PolityIV | all years     | -0.254 | -1.485 |
| Population aged 0-14 years, % | PolityIV | Cold War      | -0.375 | -1.495 |
| Population aged 0-14 years, % | PolityIV | post-Cold War | -0.195 | -0.806 |
| Population aged 0-14 years, % | PolityIV | Third wave    | -0.320 | -1.782 |
| Population aged 0-14 years, % | V-Dem    | all years     | -0.170 | -1.103 |
| Population aged 0-14 years, % | V-Dem    | Cold War      | -0.325 | -1.318 |
| Population aged 0-14 years, % | V-Dem    | post-Cold War | -0.064 | -0.344 |
| Population aged 0-14 years, % | V-Dem    | Third wave    | -0.259 | -1.748 |
| Ethnic fractionalization      | ACLP     | all years     | 0.016  | 0.136  |
| Ethnic fractionalization      | ACLP     | Cold War      | -0.262 | -1.693 |
| Ethnic fractionalization      | ACLP     | post-Cold War | 0.278  | 1.570  |
| Ethnic fractionalization      | ACLP     | Third wave    | 0.021  | 0.193  |
| Ethnic fractionalization      | BMR      | all years     | -0.059 | -0.539 |
| Ethnic fractionalization      | BMR      | Cold War      | -0.160 | -0.979 |
| Ethnic fractionalization      | BMR      | post-Cold War | -0.087 | -0.546 |
| Ethnic fractionalization      | BMR      | Third wave    | -0.074 | -0.670 |
| Ethnic fractionalization      | PolityIV | all years     | -0.157 | -1.398 |
| Ethnic fractionalization      | PolityIV | Cold War      | -0.451 | -2.399 |
| Ethnic fractionalization      | PolityIV | post-Cold War | -0.081 | -0.553 |
| Ethnic fractionalization      | PolityIV | Third wave    | -0.123 | -1.102 |
| Ethnic fractionalization      | V-Dem    | all years     | 0.029  | 0.251  |
| Ethnic fractionalization      | V-Dem    | Cold War      | -0.262 | -1.381 |
| Ethnic fractionalization      | V-Dem    | post-Cold War | 0.048  | 0.345  |
| Ethnic fractionalization      | V-Dem    | Third wave    | 0.020  | 0.183  |
| Linguistic fractionalization  | ACLP     | all years     | -0.034 | -0.291 |
| Linguistic fractionalization  | ACLP     | Cold War      | -0.301 | -1.879 |
| Linguistic fractionalization  | ACLP     | post-Cold War | 0.166  | 1.034  |
| Linguistic fractionalization  | ACLP     | Third wave    | -0.040 | -0.354 |

|                              |          |               |        |        |
|------------------------------|----------|---------------|--------|--------|
| Linguistic fractionalization | BMR      | all years     | -0.052 | -0.489 |
| Linguistic fractionalization | BMR      | Cold War      | -0.209 | -1.222 |
| Linguistic fractionalization | BMR      | post-Cold War | -0.076 | -0.468 |
| Linguistic fractionalization | BMR      | Third wave    | -0.097 | -0.870 |
| Linguistic fractionalization | PolityIV | all years     | -0.100 | -0.844 |
| Linguistic fractionalization | PolityIV | Cold War      | -0.499 | -2.273 |
| Linguistic fractionalization | PolityIV | post-Cold War | -0.034 | -0.206 |
| Linguistic fractionalization | PolityIV | Third wave    | -0.119 | -0.996 |
| Linguistic fractionalization | V-Dem    | all years     | 0.137  | 1.292  |
| Linguistic fractionalization | V-Dem    | Cold War      | -0.318 | -1.350 |
| Linguistic fractionalization | V-Dem    | post-Cold War | 0.164  | 1.244  |
| Linguistic fractionalization | V-Dem    | Third wave    | 0.076  | 0.752  |
| Religious fractionalization  | ACLP     | all years     | -0.147 | -1.235 |
| Religious fractionalization  | ACLP     | Cold War      | -0.368 | -2.186 |
| Religious fractionalization  | ACLP     | post-Cold War | 0.051  | 0.342  |
| Religious fractionalization  | ACLP     | Third wave    | -0.149 | -1.296 |
| Religious fractionalization  | BMR      | all years     | -0.069 | -0.640 |
| Religious fractionalization  | BMR      | Cold War      | -0.213 | -1.365 |
| Religious fractionalization  | BMR      | post-Cold War | 0.014  | 0.095  |
| Religious fractionalization  | BMR      | Third wave    | -0.070 | -0.614 |
| Religious fractionalization  | PolityIV | all years     | -0.008 | -0.069 |
| Religious fractionalization  | PolityIV | Cold War      | -0.242 | -1.170 |
| Religious fractionalization  | PolityIV | post-Cold War | 0.092  | 0.578  |
| Religious fractionalization  | PolityIV | Third wave    | 0.002  | 0.020  |
| Religious fractionalization  | V-Dem    | all years     | 0.061  | 0.597  |
| Religious fractionalization  | V-Dem    | Cold War      | -0.274 | -1.356 |
| Religious fractionalization  | V-Dem    | post-Cold War | 0.160  | 1.163  |
| Religious fractionalization  | V-Dem    | Third wave    | 0.066  | 0.657  |
| Nr. relevant groups          | ACLP     | all years     | -0.182 | -1.775 |
| Nr. relevant groups          | ACLP     | Cold War      | -0.120 | -1.052 |
| Nr. relevant groups          | ACLP     | post-Cold War | -0.348 | -1.730 |
| Nr. relevant groups          | ACLP     | Third wave    | -0.247 | -2.112 |
| Nr. relevant groups          | BMR      | all years     | 0.129  | 2.779  |
| Nr. relevant groups          | BMR      | Cold War      | 0.171  | 3.930  |
| Nr. relevant groups          | BMR      | post-Cold War | 0.012  | 0.114  |
| Nr. relevant groups          | BMR      | Third wave    | 0.079  | 1.330  |
| Nr. relevant groups          | PolityIV | all years     | -0.121 | -1.399 |
| Nr. relevant groups          | PolityIV | Cold War      | -0.194 | -0.984 |
| Nr. relevant groups          | PolityIV | post-Cold War | -0.102 | -0.662 |
| Nr. relevant groups          | PolityIV | Third wave    | -0.126 | -1.286 |
| Nr. relevant groups          | V-Dem    | all years     | -0.096 | -1.319 |
| Nr. relevant groups          | V-Dem    | Cold War      | -0.149 | -0.870 |
| Nr. relevant groups          | V-Dem    | post-Cold War | -0.095 | -1.044 |
| Nr. relevant groups          | V-Dem    | Third wave    | -0.086 | -1.149 |
| Catholic population, %       | ACLP     | all years     | 0.315  | 2.659  |
| Catholic population, %       | ACLP     | Cold War      | 0.515  | 3.355  |
| Catholic population, %       | ACLP     | post-Cold War | -0.120 | -0.452 |
| Catholic population, %       | ACLP     | Third wave    | 0.326  | 2.522  |
| Catholic population, %       | BMR      | all years     | 0.287  | 2.506  |
| Catholic population, %       | BMR      | Cold War      | 0.421  | 2.532  |
| Catholic population, %       | BMR      | post-Cold War | 0.164  | 0.778  |
| Catholic population, %       | BMR      | Third wave    | 0.337  | 2.801  |
| Catholic population, %       | PolityIV | all years     | 0.320  | 2.832  |
| Catholic population, %       | PolityIV | Cold War      | 0.574  | 2.626  |



|                          |          |               |        |        |
|--------------------------|----------|---------------|--------|--------|
| Catholic population, %   | PolityIV | post-Cold War | 0.181  | 0.888  |
| Catholic population, %   | PolityIV | Third wave    | 0.409  | 3.705  |
| Catholic population, %   | V-Dem    | all years     | 0.158  | 1.720  |
| Catholic population, %   | V-Dem    | Cold War      | 0.391  | 2.095  |
| Catholic population, %   | V-Dem    | post-Cold War | 0.102  | 0.619  |
| Catholic population, %   | V-Dem    | Third wave    | 0.212  | 2.203  |
| Muslim population, %     | ACLP     | all years     | -0.330 | -2.185 |
| Muslim population, %     | ACLP     | Cold War      | -0.544 | -1.917 |
| Muslim population, %     | ACLP     | post-Cold War | -0.111 | -0.661 |
| Muslim population, %     | ACLP     | Third wave    | -0.337 | -2.328 |
| Muslim population, %     | BMR      | all years     | -0.278 | -1.586 |
| Muslim population, %     | BMR      | Cold War      | -0.292 | -0.997 |
| Muslim population, %     | BMR      | post-Cold War | -0.274 | -1.423 |
| Muslim population, %     | BMR      | Third wave    | -0.396 | -2.487 |
| Muslim population, %     | PolityIV | all years     | -0.306 | -1.788 |
| Muslim population, %     | PolityIV | Cold War      | -0.292 | -0.831 |
| Muslim population, %     | PolityIV | post-Cold War | -0.298 | -1.679 |
| Muslim population, %     | PolityIV | Third wave    | -0.374 | -2.410 |
| Muslim population, %     | V-Dem    | all years     | -0.343 | -2.606 |
| Muslim population, %     | V-Dem    | Cold War      | -0.448 | -1.351 |
| Muslim population, %     | V-Dem    | post-Cold War | -0.291 | -1.899 |
| Muslim population, %     | V-Dem    | Third wave    | -0.336 | -2.629 |
| Protestant population, % | ACLP     | all years     | -0.082 | -0.432 |
| Protestant population, % | ACLP     | Cold War      | -0.443 | -1.422 |
| Protestant population, % | ACLP     | post-Cold War | 0.041  | 0.191  |
| Protestant population, % | ACLP     | Third wave    | -0.136 | -0.732 |
| Protestant population, % | BMR      | all years     | 0.126  | 0.776  |
| Protestant population, % | BMR      | Cold War      | -0.255 | -0.816 |
| Protestant population, % | BMR      | post-Cold War | 0.233  | 1.188  |
| Protestant population, % | BMR      | Third wave    | 0.125  | 0.767  |
| Protestant population, % | PolityIV | all years     | 0.032  | 0.172  |
| Protestant population, % | PolityIV | Cold War      | -0.388 | -1.216 |
| Protestant population, % | PolityIV | post-Cold War | 0.028  | 0.127  |
| Protestant population, % | PolityIV | Third wave    | -0.011 | -0.058 |
| Protestant population, % | V-Dem    | all years     | 0.255  | 1.528  |
| Protestant population, % | V-Dem    | Cold War      | 0.349  | 1.045  |
| Protestant population, % | V-Dem    | post-Cold War | 0.023  | 0.110  |
| Protestant population, % | V-Dem    | Third wave    | 0.113  | 0.719  |
| Sub-saharan Africa       | ACLP     | all years     | 0.008  | 0.031  |
| Sub-saharan Africa       | ACLP     | Cold War      | -1.152 | -2.254 |
| Sub-saharan Africa       | ACLP     | post-Cold War | 0.385  | 1.178  |
| Sub-saharan Africa       | ACLP     | Third wave    | -0.125 | -0.488 |
| Sub-saharan Africa       | BMR      | all years     | -0.199 | -0.742 |
| Sub-saharan Africa       | BMR      | Cold War      | -1.238 | -2.196 |
| Sub-saharan Africa       | BMR      | post-Cold War | -0.131 | -0.371 |
| Sub-saharan Africa       | BMR      | Third wave    | -0.321 | -1.224 |
| Sub-saharan Africa       | PolityIV | all years     | -0.127 | -0.437 |
| Sub-saharan Africa       | PolityIV | Cold War      | -1.743 | -2.287 |
| Sub-saharan Africa       | PolityIV | post-Cold War | 0.023  | 0.064  |
| Sub-saharan Africa       | PolityIV | Third wave    | -0.226 | -0.788 |
| Sub-saharan Africa       | V-Dem    | all years     | 0.375  | 1.495  |
| Sub-saharan Africa       | V-Dem    | Cold War      | -0.194 | -0.336 |
| Sub-saharan Africa       | V-Dem    | post-Cold War | 0.087  | 0.287  |
| Sub-saharan Africa       | V-Dem    | Third wave    | 0.059  | 0.235  |

|                              |          |               |        |        |
|------------------------------|----------|---------------|--------|--------|
| Central/South America        | ACLP     | all years     | 0.901  | 3.276  |
| Central/South America        | ACLP     | Cold War      | 1.225  | 3.577  |
| Central/South America        | ACLP     | post-Cold War | 0.843  | 1.812  |
| Central/South America        | ACLP     | Third wave    | 0.890  | 3.231  |
| Central/South America        | BMR      | all years     | 0.808  | 2.867  |
| Central/South America        | BMR      | Cold War      | 0.965  | 2.563  |
| Central/South America        | BMR      | post-Cold War | 1.153  | 2.266  |
| Central/South America        | BMR      | Third wave    | 0.875  | 3.103  |
| Central/South America        | PolityIV | all years     | 0.729  | 2.720  |
| Central/South America        | PolityIV | Cold War      | 1.275  | 3.052  |
| Central/South America        | PolityIV | post-Cold War | 0.588  | 1.188  |
| Central/South America        | PolityIV | Third wave    | 0.891  | 3.362  |
| Central/South America        | V-Dem    | all years     | 0.490  | 2.128  |
| Central/South America        | V-Dem    | Cold War      | 1.222  | 2.929  |
| Central/South America        | V-Dem    | post-Cold War | 0.575  | 1.403  |
| Central/South America        | V-Dem    | Third wave    | 0.555  | 2.477  |
| South East Asia              | ACLP     | all years     | 0.358  | 1.199  |
| South East Asia              | ACLP     | Cold War      | 0.466  | 1.203  |
| South East Asia              | ACLP     | post-Cold War | 0.361  | 0.980  |
| South East Asia              | ACLP     | Third wave    | 0.280  | 0.927  |
| South East Asia              | BMR      | all years     | 0.131  | 0.466  |
| South East Asia              | BMR      | Cold War      | 0.140  | 0.341  |
| South East Asia              | BMR      | post-Cold War | 0.320  | 0.881  |
| South East Asia              | BMR      | Third wave    | 0.104  | 0.346  |
| South East Asia              | PolityIV | all years     | 0.203  | 0.661  |
| South East Asia              | PolityIV | Cold War      | -0.184 | -0.293 |
| South East Asia              | PolityIV | post-Cold War | 0.394  | 1.174  |
| South East Asia              | PolityIV | Third wave    | 0.098  | 0.341  |
| South East Asia              | V-Dem    | all years     | 0.181  | 0.656  |
| South East Asia              | V-Dem    | Cold War      | -0.234 | -0.416 |
| South East Asia              | V-Dem    | post-Cold War | 0.266  | 0.920  |
| South East Asia              | V-Dem    | Third wave    | 0.172  | 0.678  |
| Western Europe/North America | ACLP     | all years     | 0.854  | 3.410  |
| Western Europe/North America | ACLP     | Cold War      | 0.957  | 2.961  |
| Western Europe/North America | ACLP     | post-Cold War | 12.588 | 15.317 |
| Western Europe/North America | ACLP     | Third wave    | 2.945  | 7.030  |
| Western Europe/North America | BMR      | all years     | 0.693  | 2.855  |
| Western Europe/North America | BMR      | Cold War      | 0.865  | 2.784  |
| Western Europe/North America | BMR      | post-Cold War | 13.432 | 17.647 |
| Western Europe/North America | BMR      | Third wave    | 2.868  | 6.725  |
| Western Europe/North America | PolityIV | all years     | 1.028  | 3.657  |
| Western Europe/North America | PolityIV | Cold War      | 1.376  | 3.284  |
| Western Europe/North America | PolityIV | post-Cold War | 13.993 | 24.019 |
| Western Europe/North America | PolityIV | Third wave    | 2.652  | 7.336  |
| Western Europe/North America | V-Dem    | all years     | 0.459  | 2.470  |
| Western Europe/North America | V-Dem    | Cold War      | 0.992  | 3.155  |
| Western Europe/North America | V-Dem    | post-Cold War | 14.382 | 31.767 |
| Western Europe/North America | V-Dem    | Third wave    | 2.341  | 6.619  |
| Eastern Europe/former USSR   | ACLP     | all years     | -0.224 | -0.635 |
| Eastern Europe/former USSR   | ACLP     | Cold War      | -0.105 | -0.349 |
| Eastern Europe/former USSR   | ACLP     | post-Cold War | -0.714 | -1.153 |
| Eastern Europe/former USSR   | ACLP     | Third wave    | -0.139 | -0.356 |
| Eastern Europe/former USSR   | BMR      | all years     | -0.291 | -0.781 |
| Eastern Europe/former USSR   | BMR      | Cold War      | -0.368 | -0.907 |

|                                  |          |               |        |        |
|----------------------------------|----------|---------------|--------|--------|
| Eastern Europe/former USSR       | BMR      | post-Cold War | -0.507 | -0.882 |
| Eastern Europe/former USSR       | BMR      | Third wave    | -0.192 | -0.458 |
| Eastern Europe/former USSR       | PolityIV | all years     | 0.100  | 0.339  |
| Eastern Europe/former USSR       | PolityIV | Cold War      | -0.639 | -1.020 |
| Eastern Europe/former USSR       | PolityIV | post-Cold War | -0.083 | -0.199 |
| Eastern Europe/former USSR       | PolityIV | Third wave    | 0.130  | 0.416  |
| Eastern Europe/former USSR       | V-Dem    | all years     | 0.141  | 0.555  |
| Eastern Europe/former USSR       | V-Dem    | Cold War      | -0.577 | -1.132 |
| Eastern Europe/former USSR       | V-Dem    | post-Cold War | -0.121 | -0.382 |
| Eastern Europe/former USSR       | V-Dem    | Third wave    | 0.102  | 0.397  |
| Middle East/North Africa         | ACLP     | all years     | -1.946 | -2.782 |
| Middle East/North Africa         | ACLP     | Cold War      | -1.510 | -1.714 |
| Middle East/North Africa         | ACLP     | post-Cold War | -2.220 | -2.174 |
| Middle East/North Africa         | ACLP     | Third wave    | -2.033 | -3.137 |
| Middle East/North Africa         | BMR      | all years     | -1.687 | -2.807 |
| Middle East/North Africa         | BMR      | Cold War      | -1.158 | -1.540 |
| Middle East/North Africa         | BMR      | post-Cold War | -2.284 | -2.262 |
| Middle East/North Africa         | BMR      | Third wave    | -1.974 | -2.993 |
| Middle East/North Africa         | PolityIV | all years     | -1.456 | -2.114 |
| Middle East/North Africa         | PolityIV | Cold War      | -1.111 | -0.897 |
| Middle East/North Africa         | PolityIV | post-Cold War | -1.301 | -2.001 |
| Middle East/North Africa         | PolityIV | Third wave    | -1.660 | -2.957 |
| Middle East/North Africa         | V-Dem    | all years     | -1.878 | -3.295 |
| Middle East/North Africa         | V-Dem    | Cold War      | -1.988 | -1.627 |
| Middle East/North Africa         | V-Dem    | post-Cold War | -1.466 | -2.232 |
| Middle East/North Africa         | V-Dem    | Third wave    | -1.768 | -3.185 |
| Global proportion of democracies | ACLP     | all years     | 0.375  | 2.863  |
| Global proportion of democracies | ACLP     | Cold War      | 2.831  | 3.409  |
| Global proportion of democracies | ACLP     | post-Cold War | 0.179  | 0.462  |
| Global proportion of democracies | ACLP     | Third wave    | 0.231  | 1.961  |
| Global proportion of democracies | BMR      | all years     | 0.290  | 2.237  |
| Global proportion of democracies | BMR      | Cold War      | 1.245  | 1.672  |
| Global proportion of democracies | BMR      | post-Cold War | -0.710 | -2.214 |
| Global proportion of democracies | BMR      | Third wave    | 0.175  | 1.476  |
| Global proportion of democracies | PolityIV | all years     | 0.390  | 2.988  |
| Global proportion of democracies | PolityIV | Cold War      | 1.502  | 1.710  |
| Global proportion of democracies | PolityIV | post-Cold War | -0.683 | -2.071 |
| Global proportion of democracies | PolityIV | Third wave    | 0.294  | 2.483  |
| Global proportion of democracies | V-Dem    | all years     | 0.619  | 4.905  |
| Global proportion of democracies | V-Dem    | Cold War      | 1.322  | 1.685  |
| Global proportion of democracies | V-Dem    | post-Cold War | -0.183 | -0.663 |
| Global proportion of democracies | V-Dem    | Third wave    | 0.437  | 3.973  |
| Aid received                     | ACLP     | all years     | 0.222  | 2.263  |
| Aid received                     | ACLP     | Cold War      | -0.032 | -0.218 |
| Aid received                     | ACLP     | post-Cold War | 0.300  | 2.073  |
| Aid received                     | ACLP     | Third wave    | 0.144  | 1.434  |
| Aid received                     | BMR      | all years     | 0.208  | 1.999  |
| Aid received                     | BMR      | Cold War      | -0.202 | -1.279 |
| Aid received                     | BMR      | post-Cold War | 0.315  | 2.187  |
| Aid received                     | BMR      | Third wave    | 0.162  | 1.528  |
| Aid received                     | PolityIV | all years     | 0.150  | 1.463  |
| Aid received                     | PolityIV | Cold War      | -0.151 | -0.887 |
| Aid received                     | PolityIV | post-Cold War | 0.133  | 0.935  |
| Aid received                     | PolityIV | Third wave    | 0.078  | 0.744  |

|                           |          |               |        |        |
|---------------------------|----------|---------------|--------|--------|
| Aid received              | V-Dem    | all years     | 0.356  | 3.617  |
| Aid received              | V-Dem    | Cold War      | 0.034  | 0.266  |
| Aid received              | V-Dem    | post-Cold War | 0.364  | 3.203  |
| Aid received              | V-Dem    | Third wave    | 0.259  | 2.735  |
| Neighborhood Polity score | ACLP     | all years     | 0.526  | 4.083  |
| Neighborhood Polity score | ACLP     | Cold War      | 0.549  | 2.913  |
| Neighborhood Polity score | ACLP     | post-Cold War | 0.420  | 1.953  |
| Neighborhood Polity score | ACLP     | Third wave    | 0.537  | 4.138  |
| Neighborhood Polity score | BMR      | all years     | 0.621  | 4.430  |
| Neighborhood Polity score | BMR      | Cold War      | 0.367  | 1.728  |
| Neighborhood Polity score | BMR      | post-Cold War | 0.873  | 3.546  |
| Neighborhood Polity score | BMR      | Third wave    | 0.673  | 4.703  |
| Neighborhood Polity score | PolityIV | all years     | 0.741  | 5.274  |
| Neighborhood Polity score | PolityIV | Cold War      | 0.487  | 2.071  |
| Neighborhood Polity score | PolityIV | post-Cold War | 0.731  | 3.748  |
| Neighborhood Polity score | PolityIV | Third wave    | 0.803  | 6.183  |
| Neighborhood Polity score | V-Dem    | all years     | 0.903  | 6.258  |
| Neighborhood Polity score | V-Dem    | Cold War      | 0.569  | 2.305  |
| Neighborhood Polity score | V-Dem    | post-Cold War | 0.862  | 4.788  |
| Neighborhood Polity score | V-Dem    | Third wave    | 0.867  | 6.316  |
| Neighborhood GDP pc       | ACLP     | all years     | 0.202  | 0.971  |
| Neighborhood GDP pc       | ACLP     | Cold War      | 0.035  | 0.133  |
| Neighborhood GDP pc       | ACLP     | post-Cold War | -0.023 | -0.068 |
| Neighborhood GDP pc       | ACLP     | Third wave    | 0.067  | 0.298  |
| Neighborhood GDP pc       | BMR      | all years     | 0.422  | 2.044  |
| Neighborhood GDP pc       | BMR      | Cold War      | 0.142  | 0.560  |
| Neighborhood GDP pc       | BMR      | post-Cold War | 0.368  | 1.083  |
| Neighborhood GDP pc       | BMR      | Third wave    | 0.403  | 1.825  |
| Neighborhood GDP pc       | PolityIV | all years     | 0.393  | 2.089  |
| Neighborhood GDP pc       | PolityIV | Cold War      | 0.311  | 0.849  |
| Neighborhood GDP pc       | PolityIV | post-Cold War | 0.098  | 0.365  |
| Neighborhood GDP pc       | PolityIV | Third wave    | 0.301  | 1.609  |
| Neighborhood GDP pc       | V-Dem    | all years     | 0.395  | 2.075  |
| Neighborhood GDP pc       | V-Dem    | Cold War      | -0.043 | -0.140 |
| Neighborhood GDP pc       | V-Dem    | post-Cold War | 0.134  | 0.539  |
| Neighborhood GDP pc       | V-Dem    | Third wave    | 0.205  | 1.103  |
| Neighborhood ILC          | ACLP     | all years     | -0.396 | -1.576 |
| Neighborhood ILC          | ACLP     | Cold War      | -0.211 | -0.692 |
| Neighborhood ILC          | ACLP     | post-Cold War | -0.585 | -1.316 |
| Neighborhood ILC          | ACLP     | Third wave    | -0.323 | -1.138 |
| Neighborhood ILC          | BMR      | all years     | -0.147 | -0.575 |
| Neighborhood ILC          | BMR      | Cold War      | 0.148  | 0.483  |
| Neighborhood ILC          | BMR      | post-Cold War | -0.405 | -1.001 |
| Neighborhood ILC          | BMR      | Third wave    | -0.089 | -0.322 |
| Neighborhood ILC          | PolityIV | all years     | -0.186 | -0.688 |
| Neighborhood ILC          | PolityIV | Cold War      | 0.261  | 0.681  |
| Neighborhood ILC          | PolityIV | post-Cold War | -0.442 | -1.210 |
| Neighborhood ILC          | PolityIV | Third wave    | -0.120 | -0.419 |
| Neighborhood ILC          | V-Dem    | all years     | 0.015  | 0.068  |
| Neighborhood ILC          | V-Dem    | Cold War      | 0.302  | 0.932  |
| Neighborhood ILC          | V-Dem    | post-Cold War | 0.003  | 0.011  |
| Neighborhood ILC          | V-Dem    | Third wave    | 0.058  | 0.262  |

Table A-18: Summary: Democratization

## J Democratic stability: results for all indicators, sorted by variable and concept

| Focus variable | Democracy variable | Time period   | Coefficient | T-value |
|----------------|--------------------|---------------|-------------|---------|
| Radios pc      | ACLP               | all years     | 0.062       | 0.339   |
| Radios pc      | ACLP               | Cold War      | -0.369      | -1.312  |
| Radios pc      | ACLP               | post-Cold War | 0.316       | 0.903   |
| Radios pc      | ACLP               | Third wave    | 0.124       | 0.443   |
| Radios pc      | BMR                | all years     | 0.063       | 0.305   |
| Radios pc      | BMR                | Cold War      | -0.070      | -0.230  |
| Radios pc      | BMR                | post-Cold War | 0.048       | 0.164   |
| Radios pc      | BMR                | Third wave    | -0.054      | -0.212  |
| Radios pc      | PolityIV           | all years     | 0.099       | 0.620   |
| Radios pc      | PolityIV           | Cold War      | -0.103      | -0.363  |
| Radios pc      | PolityIV           | post-Cold War | 0.227       | 0.758   |
| Radios pc      | PolityIV           | Third wave    | 0.176       | 0.670   |
| Radios pc      | V-Dem              | all years     | 0.020       | 0.101   |
| Radios pc      | V-Dem              | Cold War      | -0.119      | -0.312  |
| Radios pc      | V-Dem              | post-Cold War | 0.178       | 0.781   |
| Radios pc      | V-Dem              | Third wave    | 0.174       | 0.858   |
| TVs pc         | ACLP               | all years     | -0.077      | -0.419  |
| TVs pc         | ACLP               | Cold War      | -0.227      | -0.933  |
| TVs pc         | ACLP               | post-Cold War | -0.021      | -0.058  |
| TVs pc         | ACLP               | Third wave    | -0.004      | -0.012  |
| TVs pc         | BMR                | all years     | -0.030      | -0.176  |
| TVs pc         | BMR                | Cold War      | -0.186      | -0.765  |
| TVs pc         | BMR                | post-Cold War | 0.097       | 0.285   |
| TVs pc         | BMR                | Third wave    | 0.009       | 0.039   |
| TVs pc         | PolityIV           | all years     | -0.075      | -0.434  |
| TVs pc         | PolityIV           | Cold War      | -0.280      | -0.942  |
| TVs pc         | PolityIV           | post-Cold War | 0.110       | 0.345   |
| TVs pc         | PolityIV           | Third wave    | 0.142       | 0.585   |
| TVs pc         | V-Dem              | all years     | -0.016      | -0.078  |
| TVs pc         | V-Dem              | Cold War      | 0.323       | 0.962   |
| TVs pc         | V-Dem              | post-Cold War | -0.057      | -0.212  |
| TVs pc         | V-Dem              | Third wave    | 0.212       | 1.029   |
| Newspapers pc  | ACLP               | all years     | 0.093       | 0.547   |
| Newspapers pc  | ACLP               | Cold War      | 0.077       | 0.283   |
| Newspapers pc  | ACLP               | post-Cold War | 0.371       | 1.621   |
| Newspapers pc  | ACLP               | Third wave    | 0.106       | 0.504   |
| Newspapers pc  | BMR                | all years     | 0.041       | 0.277   |
| Newspapers pc  | BMR                | Cold War      | -0.097      | -0.375  |
| Newspapers pc  | BMR                | post-Cold War | 0.371       | 1.738   |
| Newspapers pc  | BMR                | Third wave    | 0.068       | 0.390   |
| Newspapers pc  | PolityIV           | all years     | 0.095       | 0.681   |
| Newspapers pc  | PolityIV           | Cold War      | -0.069      | -0.258  |
| Newspapers pc  | PolityIV           | post-Cold War | 0.160       | 0.758   |
| Newspapers pc  | PolityIV           | Third wave    | 0.073       | 0.452   |
| Newspapers pc  | V-Dem              | all years     | 0.359       | 2.919   |
| Newspapers pc  | V-Dem              | Cold War      | 0.632       | 3.864   |
| Newspapers pc  | V-Dem              | post-Cold War | 0.148       | 0.854   |
| Newspapers pc  | V-Dem              | Third wave    | 0.239       | 1.695   |

|                                   |          |               |        |        |
|-----------------------------------|----------|---------------|--------|--------|
| Phones pc                         | ACLP     | all years     | 0.200  | 0.568  |
| Phones pc                         | ACLP     | Cold War      | 1.052  | 2.057  |
| Phones pc                         | ACLP     | post-Cold War | -0.320 | -0.790 |
| Phones pc                         | ACLP     | Third wave    | 0.078  | 0.199  |
| Phones pc                         | BMR      | all years     | 0.438  | 1.350  |
| Phones pc                         | BMR      | Cold War      | 1.061  | 2.371  |
| Phones pc                         | BMR      | post-Cold War | 0.020  | 0.055  |
| Phones pc                         | BMR      | Third wave    | 0.259  | 0.728  |
| Phones pc                         | PolityIV | all years     | 0.336  | 1.034  |
| Phones pc                         | PolityIV | Cold War      | 1.592  | 3.178  |
| Phones pc                         | PolityIV | post-Cold War | 0.030  | 0.080  |
| Phones pc                         | PolityIV | Third wave    | 0.261  | 0.780  |
| Phones pc                         | V-Dem    | all years     | -0.242 | -0.864 |
| Phones pc                         | V-Dem    | Cold War      | 1.421  | 2.094  |
| Phones pc                         | V-Dem    | post-Cold War | -0.352 | -1.286 |
| Phones pc                         | V-Dem    | Third wave    | -0.280 | -1.088 |
| Agriculture's share of economy, % | ACLP     | all years     | 0.030  | 0.138  |
| Agriculture's share of economy, % | ACLP     | Cold War      | 0.078  | 0.300  |
| Agriculture's share of economy, % | ACLP     | post-Cold War | -0.213 | -0.625 |
| Agriculture's share of economy, % | ACLP     | Third wave    | -0.135 | -0.471 |
| Agriculture's share of economy, % | BMR      | all years     | -0.057 | -0.281 |
| Agriculture's share of economy, % | BMR      | Cold War      | 0.053  | 0.224  |
| Agriculture's share of economy, % | BMR      | post-Cold War | -0.365 | -1.072 |
| Agriculture's share of economy, % | BMR      | Third wave    | -0.271 | -1.030 |
| Agriculture's share of economy, % | PolityIV | all years     | -0.175 | -0.835 |
| Agriculture's share of economy, % | PolityIV | Cold War      | -0.292 | -0.905 |
| Agriculture's share of economy, % | PolityIV | post-Cold War | 0.012  | 0.041  |
| Agriculture's share of economy, % | PolityIV | Third wave    | -0.311 | -1.175 |
| Agriculture's share of economy, % | V-Dem    | all years     | -0.168 | -0.734 |
| Agriculture's share of economy, % | V-Dem    | Cold War      | -0.521 | -1.210 |
| Agriculture's share of economy, % | V-Dem    | post-Cold War | 0.044  | 0.153  |
| Agriculture's share of economy, % | V-Dem    | Third wave    | -0.096 | -0.387 |
| Industry's share of economy, %    | ACLP     | all years     | -0.238 | -1.006 |
| Industry's share of economy, %    | ACLP     | Cold War      | -0.283 | -0.886 |
| Industry's share of economy, %    | ACLP     | post-Cold War | -0.105 | -0.286 |
| Industry's share of economy, %    | ACLP     | Third wave    | -0.114 | -0.414 |
| Industry's share of economy, %    | BMR      | all years     | -0.236 | -1.131 |
| Industry's share of economy, %    | BMR      | Cold War      | -0.314 | -1.127 |
| Industry's share of economy, %    | BMR      | post-Cold War | -0.044 | -0.128 |
| Industry's share of economy, %    | BMR      | Third wave    | -0.117 | -0.488 |
| Industry's share of economy, %    | PolityIV | all years     | -0.225 | -1.215 |
| Industry's share of economy, %    | PolityIV | Cold War      | -0.166 | -0.495 |
| Industry's share of economy, %    | PolityIV | post-Cold War | -0.315 | -1.483 |
| Industry's share of economy, %    | PolityIV | Third wave    | -0.195 | -0.897 |
| Industry's share of economy, %    | V-Dem    | all years     | 0.072  | 0.335  |
| Industry's share of economy, %    | V-Dem    | Cold War      | 0.076  | 0.176  |
| Industry's share of economy, %    | V-Dem    | post-Cold War | 0.069  | 0.279  |
| Industry's share of economy, %    | V-Dem    | Third wave    | 0.154  | 0.687  |
| Energy consumption pc             | ACLP     | all years     | 0.320  | 2.076  |
| Energy consumption pc             | ACLP     | Cold War      | 0.188  | 1.294  |
| Energy consumption pc             | ACLP     | post-Cold War | 0.816  | 2.433  |
| Energy consumption pc             | ACLP     | Third wave    | 0.580  | 2.048  |
| Energy consumption pc             | BMR      | all years     | 0.033  | 0.164  |
| Energy consumption pc             | BMR      | Cold War      | 0.023  | 0.104  |

|                                 |          |               |        |        |
|---------------------------------|----------|---------------|--------|--------|
| Energy consumption pc           | BMR      | post-Cold War | 0.111  | 0.318  |
| Energy consumption pc           | BMR      | Third wave    | -0.096 | -0.264 |
| Energy consumption pc           | PolityIV | all years     | 0.224  | 1.960  |
| Energy consumption pc           | PolityIV | Cold War      | 0.135  | 0.933  |
| Energy consumption pc           | PolityIV | post-Cold War | 0.189  | 0.833  |
| Energy consumption pc           | PolityIV | Third wave    | 0.227  | 1.184  |
| Energy consumption pc           | V-Dem    | all years     | 0.271  | 1.406  |
| Energy consumption pc           | V-Dem    | Cold War      | 0.779  | 1.796  |
| Energy consumption pc           | V-Dem    | post-Cold War | -0.004 | -0.018 |
| Energy consumption pc           | V-Dem    | Third wave    | 0.036  | 0.166  |
| Urban population, %             | ACLP     | all years     | 0.162  | 0.547  |
| Urban population, %             | ACLP     | Cold War      | -0.095 | -0.280 |
| Urban population, %             | ACLP     | post-Cold War | 0.739  | 1.958  |
| Urban population, %             | ACLP     | Third wave    | 0.406  | 1.178  |
| Urban population, %             | BMR      | all years     | 0.071  | 0.243  |
| Urban population, %             | BMR      | Cold War      | -0.179 | -0.620 |
| Urban population, %             | BMR      | post-Cold War | 0.650  | 1.433  |
| Urban population, %             | BMR      | Third wave    | 0.336  | 0.889  |
| Urban population, %             | PolityIV | all years     | 0.411  | 1.517  |
| Urban population, %             | PolityIV | Cold War      | 0.461  | 0.983  |
| Urban population, %             | PolityIV | post-Cold War | 0.267  | 0.689  |
| Urban population, %             | PolityIV | Third wave    | 0.471  | 1.434  |
| Urban population, %             | V-Dem    | all years     | 0.363  | 1.654  |
| Urban population, %             | V-Dem    | Cold War      | 0.118  | 0.271  |
| Urban population, %             | V-Dem    | post-Cold War | 0.382  | 1.378  |
| Urban population, %             | V-Dem    | Third wave    | 0.289  | 1.283  |
| School enrollment, primary, %   | ACLP     | all years     | -0.115 | -0.815 |
| School enrollment, primary, %   | ACLP     | Cold War      | -0.237 | -1.003 |
| School enrollment, primary, %   | ACLP     | post-Cold War | -0.029 | -0.166 |
| School enrollment, primary, %   | ACLP     | Third wave    | -0.119 | -0.697 |
| School enrollment, primary, %   | BMR      | all years     | 0.055  | 0.415  |
| School enrollment, primary, %   | BMR      | Cold War      | -0.179 | -0.924 |
| School enrollment, primary, %   | BMR      | post-Cold War | 0.334  | 1.781  |
| School enrollment, primary, %   | BMR      | Third wave    | 0.110  | 0.689  |
| School enrollment, primary, %   | PolityIV | all years     | -0.074 | -0.574 |
| School enrollment, primary, %   | PolityIV | Cold War      | -0.306 | -1.201 |
| School enrollment, primary, %   | PolityIV | post-Cold War | 0.095  | 0.522  |
| School enrollment, primary, %   | PolityIV | Third wave    | 0.021  | 0.150  |
| School enrollment, primary, %   | V-Dem    | all years     | -0.051 | -0.406 |
| School enrollment, primary, %   | V-Dem    | Cold War      | -0.065 | -0.243 |
| School enrollment, primary, %   | V-Dem    | post-Cold War | -0.036 | -0.235 |
| School enrollment, primary, %   | V-Dem    | Third wave    | -0.014 | -0.116 |
| School enrollment, secondary, % | ACLP     | all years     | 0.487  | 2.163  |
| School enrollment, secondary, % | ACLP     | Cold War      | 0.305  | 0.969  |
| School enrollment, secondary, % | ACLP     | post-Cold War | 0.639  | 1.921  |
| School enrollment, secondary, % | ACLP     | Third wave    | 0.624  | 2.278  |
| School enrollment, secondary, % | BMR      | all years     | 0.270  | 1.156  |
| School enrollment, secondary, % | BMR      | Cold War      | -0.021 | -0.068 |
| School enrollment, secondary, % | BMR      | post-Cold War | 0.607  | 1.815  |
| School enrollment, secondary, % | BMR      | Third wave    | 0.377  | 1.242  |
| School enrollment, secondary, % | PolityIV | all years     | 0.303  | 1.099  |
| School enrollment, secondary, % | PolityIV | Cold War      | 0.649  | 1.579  |
| School enrollment, secondary, % | PolityIV | post-Cold War | 0.149  | 0.371  |
| School enrollment, secondary, % | PolityIV | Third wave    | 0.174  | 0.495  |

|                                    |          |               |        |        |
|------------------------------------|----------|---------------|--------|--------|
| School enrollment, secondary, %    | V-Dem    | all years     | 0.254  | 1.179  |
| School enrollment, secondary, %    | V-Dem    | Cold War      | 0.778  | 1.929  |
| School enrollment, secondary, %    | V-Dem    | post-Cold War | 0.029  | 0.111  |
| School enrollment, secondary, %    | V-Dem    | Third wave    | 0.143  | 0.640  |
| Average years of education, female | ACLP     | all years     | 0.342  | 1.644  |
| Average years of education, female | ACLP     | Cold War      | 0.132  | 0.449  |
| Average years of education, female | ACLP     | post-Cold War | 0.527  | 1.693  |
| Average years of education, female | ACLP     | Third wave    | 0.540  | 1.994  |
| Average years of education, female | BMR      | all years     | 0.228  | 1.162  |
| Average years of education, female | BMR      | Cold War      | 0.007  | 0.026  |
| Average years of education, female | BMR      | post-Cold War | 0.444  | 1.478  |
| Average years of education, female | BMR      | Third wave    | 0.352  | 1.362  |
| Average years of education, female | PolityIV | all years     | 0.059  | 0.280  |
| Average years of education, female | PolityIV | Cold War      | 0.212  | 0.649  |
| Average years of education, female | PolityIV | post-Cold War | -0.031 | -0.106 |
| Average years of education, female | PolityIV | Third wave    | 0.002  | 0.007  |
| Average years of education, female | V-Dem    | all years     | 0.101  | 0.545  |
| Average years of education, female | V-Dem    | Cold War      | 0.444  | 1.141  |
| Average years of education, female | V-Dem    | post-Cold War | -0.001 | -0.005 |
| Average years of education, female | V-Dem    | Third wave    | 0.054  | 0.288  |
| Average years of education, male   | ACLP     | all years     | 0.312  | 1.672  |
| Average years of education, male   | ACLP     | Cold War      | 0.046  | 0.165  |
| Average years of education, male   | ACLP     | post-Cold War | 0.466  | 1.840  |
| Average years of education, male   | ACLP     | Third wave    | 0.461  | 2.042  |
| Average years of education, male   | BMR      | all years     | 0.195  | 1.044  |
| Average years of education, male   | BMR      | Cold War      | -0.187 | -0.706 |
| Average years of education, male   | BMR      | post-Cold War | 0.503  | 1.840  |
| Average years of education, male   | BMR      | Third wave    | 0.282  | 1.225  |
| Average years of education, male   | PolityIV | all years     | 0.000  | 0.000  |
| Average years of education, male   | PolityIV | Cold War      | -0.028 | -0.084 |
| Average years of education, male   | PolityIV | post-Cold War | 0.021  | 0.069  |
| Average years of education, male   | PolityIV | Third wave    | -0.017 | -0.065 |
| Average years of education, male   | V-Dem    | all years     | 0.062  | 0.385  |
| Average years of education, male   | V-Dem    | Cold War      | 0.463  | 1.402  |
| Average years of education, male   | V-Dem    | post-Cold War | -0.051 | -0.261 |
| Average years of education, male   | V-Dem    | Third wave    | 0.017  | 0.109  |
| Oil rents, % GDP                   | ACLP     | all years     | -0.187 | -0.794 |
| Oil rents, % GDP                   | ACLP     | Cold War      | 0.091  | 0.291  |
| Oil rents, % GDP                   | ACLP     | post-Cold War | -0.313 | -1.085 |
| Oil rents, % GDP                   | ACLP     | Third wave    | -0.216 | -0.872 |
| Oil rents, % GDP                   | BMR      | all years     | -0.202 | -1.098 |
| Oil rents, % GDP                   | BMR      | Cold War      | 0.056  | 0.192  |
| Oil rents, % GDP                   | BMR      | post-Cold War | -0.257 | -0.732 |
| Oil rents, % GDP                   | BMR      | Third wave    | -0.225 | -0.993 |
| Oil rents, % GDP                   | PolityIV | all years     | -0.130 | -0.571 |
| Oil rents, % GDP                   | PolityIV | Cold War      | 0.581  | 1.069  |
| Oil rents, % GDP                   | PolityIV | post-Cold War | -0.407 | -1.573 |
| Oil rents, % GDP                   | PolityIV | Third wave    | -0.250 | -1.100 |
| Oil rents, % GDP                   | V-Dem    | all years     | 0.049  | 0.128  |
| Oil rents, % GDP                   | V-Dem    | Cold War      | 1.512  | 1.603  |
| Oil rents, % GDP                   | V-Dem    | post-Cold War | -0.259 | -0.936 |
| Oil rents, % GDP                   | V-Dem    | Third wave    | -0.184 | -0.685 |
| Resource rents, % GDP              | ACLP     | all years     | -0.258 | -1.456 |
| Resource rents, % GDP              | ACLP     | Cold War      | 0.012  | 0.045  |



|                       |          |               |        |        |
|-----------------------|----------|---------------|--------|--------|
| Resource rents, % GDP | ACLP     | post-Cold War | -0.443 | -2.272 |
| Resource rents, % GDP | ACLP     | Third wave    | -0.291 | -1.569 |
| Resource rents, % GDP | BMR      | all years     | -0.101 | -0.550 |
| Resource rents, % GDP | BMR      | Cold War      | -0.036 | -0.138 |
| Resource rents, % GDP | BMR      | post-Cold War | -0.157 | -0.609 |
| Resource rents, % GDP | BMR      | Third wave    | -0.128 | -0.637 |
| Resource rents, % GDP | PolityIV | all years     | -0.055 | -0.282 |
| Resource rents, % GDP | PolityIV | Cold War      | 0.100  | 0.304  |
| Resource rents, % GDP | PolityIV | post-Cold War | -0.099 | -0.391 |
| Resource rents, % GDP | PolityIV | Third wave    | -0.005 | -0.020 |
| Resource rents, % GDP | V-Dem    | all years     | -0.143 | -0.790 |
| Resource rents, % GDP | V-Dem    | Cold War      | 0.190  | 0.498  |
| Resource rents, % GDP | V-Dem    | post-Cold War | -0.170 | -0.777 |
| Resource rents, % GDP | V-Dem    | Third wave    | -0.132 | -0.685 |
| Oil/gas value pc      | ACLP     | all years     | -0.247 | -1.354 |
| Oil/gas value pc      | ACLP     | Cold War      | -0.214 | -0.888 |
| Oil/gas value pc      | ACLP     | post-Cold War | -0.202 | -0.650 |
| Oil/gas value pc      | ACLP     | Third wave    | -0.281 | -1.521 |
| Oil/gas value pc      | BMR      | all years     | -0.506 | -2.371 |
| Oil/gas value pc      | BMR      | Cold War      | -0.477 | -1.800 |
| Oil/gas value pc      | BMR      | post-Cold War | -0.409 | -1.468 |
| Oil/gas value pc      | BMR      | Third wave    | -0.508 | -2.341 |
| Oil/gas value pc      | PolityIV | all years     | -0.192 | -0.970 |
| Oil/gas value pc      | PolityIV | Cold War      | -0.008 | -0.027 |
| Oil/gas value pc      | PolityIV | post-Cold War | -0.350 | -1.319 |
| Oil/gas value pc      | PolityIV | Third wave    | -0.260 | -1.171 |
| Oil/gas value pc      | V-Dem    | all years     | 0.042  | 0.237  |
| Oil/gas value pc      | V-Dem    | Cold War      | 0.135  | 0.421  |
| Oil/gas value pc      | V-Dem    | post-Cold War | 0.003  | 0.014  |
| Oil/gas value pc      | V-Dem    | Third wave    | 0.031  | 0.161  |
| Wage share            | ACLP     | all years     | 0.144  | 1.131  |
| Wage share            | ACLP     | Cold War      | 0.250  | 1.351  |
| Wage share            | ACLP     | post-Cold War | 0.103  | 0.611  |
| Wage share            | ACLP     | Third wave    | 0.123  | 0.806  |
| Wage share            | BMR      | all years     | 0.313  | 2.253  |
| Wage share            | BMR      | Cold War      | 0.267  | 1.573  |
| Wage share            | BMR      | post-Cold War | 0.432  | 1.973  |
| Wage share            | BMR      | Third wave    | 0.359  | 2.113  |
| Wage share            | PolityIV | all years     | 0.315  | 2.002  |
| Wage share            | PolityIV | Cold War      | 0.167  | 0.858  |
| Wage share            | PolityIV | post-Cold War | 0.377  | 1.811  |
| Wage share            | PolityIV | Third wave    | 0.380  | 2.005  |
| Wage share            | V-Dem    | all years     | 0.174  | 1.276  |
| Wage share            | V-Dem    | Cold War      | 0.167  | 0.687  |
| Wage share            | V-Dem    | post-Cold War | 0.083  | 0.499  |
| Wage share            | V-Dem    | Third wave    | 0.067  | 0.487  |
| Family farms          | ACLP     | all years     | -0.126 | -0.790 |
| Family farms          | ACLP     | Cold War      | -0.139 | -0.598 |
| Family farms          | ACLP     | post-Cold War | -0.122 | -0.522 |
| Family farms          | ACLP     | Third wave    | -0.097 | -0.532 |
| Family farms          | BMR      | all years     | 0.362  | 1.944  |
| Family farms          | BMR      | Cold War      | 0.298  | 1.152  |
| Family farms          | BMR      | post-Cold War | 0.575  | 2.296  |
| Family farms          | BMR      | Third wave    | 0.476  | 2.310  |

|               |          |               |        |        |
|---------------|----------|---------------|--------|--------|
| Family farms  | PolityIV | all years     | 0.144  | 0.930  |
| Family farms  | PolityIV | Cold War      | 0.150  | 0.687  |
| Family farms  | PolityIV | post-Cold War | 0.180  | 0.873  |
| Family farms  | PolityIV | Third wave    | 0.211  | 1.181  |
| Family farms  | V-Dem    | all years     | 0.125  | 0.822  |
| Family farms  | V-Dem    | Cold War      | -0.269 | -0.691 |
| Family farms  | V-Dem    | post-Cold War | 0.284  | 1.670  |
| Family farms  | V-Dem    | Third wave    | 0.151  | 0.998  |
| GINI market   | ACLP     | all years     | 0.177  | 1.002  |
| GINI market   | ACLP     | Cold War      | 0.667  | 2.613  |
| GINI market   | ACLP     | post-Cold War | -0.483 | -1.712 |
| GINI market   | ACLP     | Third wave    | -0.100 | -0.479 |
| GINI market   | BMR      | all years     | 0.392  | 1.915  |
| GINI market   | BMR      | Cold War      | 0.908  | 3.197  |
| GINI market   | BMR      | post-Cold War | -0.104 | -0.378 |
| GINI market   | BMR      | Third wave    | 0.150  | 0.650  |
| GINI market   | PolityIV | all years     | 0.058  | 0.342  |
| GINI market   | PolityIV | Cold War      | 0.565  | 1.758  |
| GINI market   | PolityIV | post-Cold War | -0.264 | -1.135 |
| GINI market   | PolityIV | Third wave    | -0.142 | -0.728 |
| GINI market   | V-Dem    | all years     | 0.078  | 0.542  |
| GINI market   | V-Dem    | Cold War      | 0.755  | 2.949  |
| GINI market   | V-Dem    | post-Cold War | -0.248 | -1.375 |
| GINI market   | V-Dem    | Third wave    | -0.071 | -0.449 |
| Growth, % GDP | ACLP     | all years     | 0.292  | 2.239  |
| Growth, % GDP | ACLP     | Cold War      | 0.633  | 2.951  |
| Growth, % GDP | ACLP     | post-Cold War | 0.155  | 0.908  |
| Growth, % GDP | ACLP     | Third wave    | 0.325  | 2.080  |
| Growth, % GDP | BMR      | all years     | 0.303  | 1.734  |
| Growth, % GDP | BMR      | Cold War      | 0.720  | 3.657  |
| Growth, % GDP | BMR      | post-Cold War | -0.124 | -0.589 |
| Growth, % GDP | BMR      | Third wave    | 0.252  | 1.083  |
| Growth, % GDP | PolityIV | all years     | 0.171  | 1.040  |
| Growth, % GDP | PolityIV | Cold War      | 0.373  | 1.316  |
| Growth, % GDP | PolityIV | post-Cold War | 0.039  | 0.186  |
| Growth, % GDP | PolityIV | Third wave    | 0.148  | 0.823  |
| Growth, % GDP | V-Dem    | all years     | 0.078  | 0.553  |
| Growth, % GDP | V-Dem    | Cold War      | 0.658  | 1.818  |
| Growth, % GDP | V-Dem    | post-Cold War | -0.131 | -1.002 |
| Growth, % GDP | V-Dem    | Third wave    | -0.006 | -0.043 |
| Inflation, %  | ACLP     | all years     | -0.092 | -0.969 |
| Inflation, %  | ACLP     | Cold War      | -0.229 | -1.977 |
| Inflation, %  | ACLP     | post-Cold War | 0.479  | 1.613  |
| Inflation, %  | ACLP     | Third wave    | -0.063 | -0.445 |
| Inflation, %  | BMR      | all years     | -0.168 | -2.020 |
| Inflation, %  | BMR      | Cold War      | -0.213 | -1.811 |
| Inflation, %  | BMR      | post-Cold War | -0.140 | -0.898 |
| Inflation, %  | BMR      | Third wave    | -0.166 | -1.593 |
| Inflation, %  | PolityIV | all years     | -0.216 | -2.979 |
| Inflation, %  | PolityIV | Cold War      | -0.162 | -1.516 |
| Inflation, %  | PolityIV | post-Cold War | -0.259 | -2.972 |
| Inflation, %  | PolityIV | Third wave    | -0.200 | -2.455 |
| Inflation, %  | V-Dem    | all years     | -0.067 | -0.808 |
| Inflation, %  | V-Dem    | Cold War      | -0.139 | -1.192 |

|                           |          |               |        |        |
|---------------------------|----------|---------------|--------|--------|
| Inflation, %              | V-Dem    | post-Cold War | -0.002 | -0.015 |
| Inflation, %              | V-Dem    | Third wave    | -0.000 | -0.002 |
| Trade, % GDP              | ACLP     | all years     | 0.190  | 0.683  |
| Trade, % GDP              | ACLP     | Cold War      | 0.639  | 1.490  |
| Trade, % GDP              | ACLP     | post-Cold War | -0.242 | -1.202 |
| Trade, % GDP              | ACLP     | Third wave    | 0.127  | 0.450  |
| Trade, % GDP              | BMR      | all years     | 0.449  | 1.623  |
| Trade, % GDP              | BMR      | Cold War      | 0.775  | 2.110  |
| Trade, % GDP              | BMR      | post-Cold War | 0.073  | 0.246  |
| Trade, % GDP              | BMR      | Third wave    | 0.433  | 1.333  |
| Trade, % GDP              | PolityIV | all years     | 0.205  | 0.924  |
| Trade, % GDP              | PolityIV | Cold War      | 0.769  | 1.755  |
| Trade, % GDP              | PolityIV | post-Cold War | 0.040  | 0.183  |
| Trade, % GDP              | PolityIV | Third wave    | 0.224  | 0.925  |
| Trade, % GDP              | V-Dem    | all years     | -0.063 | -0.420 |
| Trade, % GDP              | V-Dem    | Cold War      | 0.193  | 0.539  |
| Trade, % GDP              | V-Dem    | post-Cold War | -0.056 | -0.346 |
| Trade, % GDP              | V-Dem    | Third wave    | -0.026 | -0.172 |
| Investment, % GDP         | ACLP     | all years     | -0.188 | -1.177 |
| Investment, % GDP         | ACLP     | Cold War      | -0.112 | -0.641 |
| Investment, % GDP         | ACLP     | post-Cold War | -0.216 | -0.816 |
| Investment, % GDP         | ACLP     | Third wave    | -0.183 | -0.790 |
| Investment, % GDP         | BMR      | all years     | 0.002  | 0.009  |
| Investment, % GDP         | BMR      | Cold War      | 0.012  | 0.070  |
| Investment, % GDP         | BMR      | post-Cold War | 0.065  | 0.207  |
| Investment, % GDP         | BMR      | Third wave    | 0.053  | 0.220  |
| Investment, % GDP         | PolityIV | all years     | 0.344  | 1.899  |
| Investment, % GDP         | PolityIV | Cold War      | 0.494  | 1.763  |
| Investment, % GDP         | PolityIV | post-Cold War | 0.210  | 0.840  |
| Investment, % GDP         | PolityIV | Third wave    | 0.223  | 1.086  |
| Investment, % GDP         | V-Dem    | all years     | 0.373  | 2.333  |
| Investment, % GDP         | V-Dem    | Cold War      | 0.617  | 2.182  |
| Investment, % GDP         | V-Dem    | post-Cold War | 0.212  | 1.136  |
| Investment, % GDP         | V-Dem    | Third wave    | 0.289  | 1.824  |
| Federal system            | ACLP     | all years     | 0.079  | 0.220  |
| Federal system            | ACLP     | Cold War      | -0.078 | -0.174 |
| Federal system            | ACLP     | post-Cold War | 0.466  | 0.895  |
| Federal system            | ACLP     | Third wave    | 0.299  | 0.744  |
| Federal system            | BMR      | all years     | -0.309 | -0.897 |
| Federal system            | BMR      | Cold War      | -0.295 | -0.723 |
| Federal system            | BMR      | post-Cold War | -0.304 | -0.570 |
| Federal system            | BMR      | Third wave    | -0.239 | -0.577 |
| Federal system            | PolityIV | all years     | -0.105 | -0.335 |
| Federal system            | PolityIV | Cold War      | -0.399 | -0.889 |
| Federal system            | PolityIV | post-Cold War | 0.086  | 0.207  |
| Federal system            | PolityIV | Third wave    | -0.058 | -0.167 |
| Federal system            | V-Dem    | all years     | -0.238 | -0.864 |
| Federal system            | V-Dem    | Cold War      | -0.114 | -0.218 |
| Federal system            | V-Dem    | post-Cold War | -0.459 | -1.437 |
| Federal system            | V-Dem    | Third wave    | -0.269 | -1.000 |
| Plurality/majority system | ACLP     | all years     | 0.194  | 0.752  |
| Plurality/majority system | ACLP     | Cold War      | 0.210  | 0.555  |
| Plurality/majority system | ACLP     | post-Cold War | 0.215  | 0.576  |
| Plurality/majority system | ACLP     | Third wave    | -0.004 | -0.013 |

|                           |          |               |        |        |
|---------------------------|----------|---------------|--------|--------|
| Plurality/majority system | BMR      | all years     | -0.161 | -0.619 |
| Plurality/majority system | BMR      | Cold War      | 0.136  | 0.384  |
| Plurality/majority system | BMR      | post-Cold War | -0.532 | -1.344 |
| Plurality/majority system | BMR      | Third wave    | -0.437 | -1.452 |
| Plurality/majority system | PolityIV | all years     | 0.011  | 0.034  |
| Plurality/majority system | PolityIV | Cold War      | 0.514  | 0.939  |
| Plurality/majority system | PolityIV | post-Cold War | -0.334 | -0.865 |
| Plurality/majority system | PolityIV | Third wave    | -0.235 | -0.688 |
| Plurality/majority system | V-Dem    | all years     | -0.293 | -1.202 |
| Plurality/majority system | V-Dem    | Cold War      | 0.093  | 0.192  |
| Plurality/majority system | V-Dem    | post-Cold War | -0.536 | -1.850 |
| Plurality/majority system | V-Dem    | Third wave    | -0.456 | -1.906 |
| Presidential system       | ACLP     | all years     | 0.005  | 0.015  |
| Presidential system       | ACLP     | Cold War      | -0.498 | -1.140 |
| Presidential system       | ACLP     | post-Cold War | 0.615  | 1.461  |
| Presidential system       | ACLP     | Third wave    | 0.471  | 1.317  |
| Presidential system       | BMR      | all years     | -0.223 | -0.714 |
| Presidential system       | BMR      | Cold War      | -0.636 | -1.618 |
| Presidential system       | BMR      | post-Cold War | 0.336  | 0.725  |
| Presidential system       | BMR      | Third wave    | 0.140  | 0.385  |
| Presidential system       | PolityIV | all years     | -0.164 | -0.510 |
| Presidential system       | PolityIV | Cold War      | -0.073 | -0.159 |
| Presidential system       | PolityIV | post-Cold War | -0.115 | -0.276 |
| Presidential system       | PolityIV | Third wave    | -0.066 | -0.177 |
| Presidential system       | V-Dem    | all years     | -0.182 | -0.688 |
| Presidential system       | V-Dem    | Cold War      | -0.510 | -1.171 |
| Presidential system       | V-Dem    | post-Cold War | 0.177  | 0.537  |
| Presidential system       | V-Dem    | Third wave    | 0.146  | 0.552  |
| Excluded population, %    | ACLP     | all years     | 0.173  | 1.239  |
| Excluded population, %    | ACLP     | Cold War      | -0.052 | -0.267 |
| Excluded population, %    | ACLP     | post-Cold War | 0.436  | 2.567  |
| Excluded population, %    | ACLP     | Third wave    | 0.277  | 1.815  |
| Excluded population, %    | BMR      | all years     | 0.048  | 0.362  |
| Excluded population, %    | BMR      | Cold War      | -0.044 | -0.264 |
| Excluded population, %    | BMR      | post-Cold War | 0.133  | 0.716  |
| Excluded population, %    | BMR      | Third wave    | 0.041  | 0.273  |
| Excluded population, %    | PolityIV | all years     | 0.179  | 1.354  |
| Excluded population, %    | PolityIV | Cold War      | 0.195  | 0.924  |
| Excluded population, %    | PolityIV | post-Cold War | 0.203  | 1.190  |
| Excluded population, %    | PolityIV | Third wave    | 0.065  | 0.419  |
| Excluded population, %    | V-Dem    | all years     | -0.076 | -0.532 |
| Excluded population, %    | V-Dem    | Cold War      | 0.133  | 0.497  |
| Excluded population, %    | V-Dem    | post-Cold War | -0.152 | -0.886 |
| Excluded population, %    | V-Dem    | Third wave    | -0.039 | -0.291 |
| Included population, %    | ACLP     | all years     | -0.347 | -2.883 |
| Included population, %    | ACLP     | Cold War      | -0.445 | -2.440 |
| Included population, %    | ACLP     | post-Cold War | -0.220 | -1.294 |
| Included population, %    | ACLP     | Third wave    | -0.369 | -2.761 |
| Included population, %    | BMR      | all years     | -0.397 | -3.112 |
| Included population, %    | BMR      | Cold War      | -0.531 | -3.104 |
| Included population, %    | BMR      | post-Cold War | -0.186 | -0.999 |
| Included population, %    | BMR      | Third wave    | -0.340 | -2.339 |
| Included population, %    | PolityIV | all years     | -0.252 | -1.584 |
| Included population, %    | PolityIV | Cold War      | -0.390 | -1.981 |

|                           |          |               |        |        |
|---------------------------|----------|---------------|--------|--------|
| Included population, %    | PolityIV | post-Cold War | -0.051 | -0.215 |
| Included population, %    | PolityIV | Third wave    | -0.163 | -0.879 |
| Included population, %    | V-Dem    | all years     | 0.156  | 0.791  |
| Included population, %    | V-Dem    | Cold War      | 0.783  | 1.690  |
| Included population, %    | V-Dem    | post-Cold War | 0.037  | 0.175  |
| Included population, %    | V-Dem    | Third wave    | 0.152  | 0.813  |
| Largest excluded group, % | ACLP     | all years     | -0.304 | -2.389 |
| Largest excluded group, % | ACLP     | Cold War      | -0.365 | -1.773 |
| Largest excluded group, % | ACLP     | post-Cold War | -0.243 | -1.354 |
| Largest excluded group, % | ACLP     | Third wave    | -0.316 | -2.471 |
| Largest excluded group, % | BMR      | all years     | -0.261 | -1.685 |
| Largest excluded group, % | BMR      | Cold War      | -0.382 | -1.835 |
| Largest excluded group, % | BMR      | post-Cold War | -0.025 | -0.137 |
| Largest excluded group, % | BMR      | Third wave    | -0.141 | -0.969 |
| Largest excluded group, % | PolityIV | all years     | -0.162 | -0.730 |
| Largest excluded group, % | PolityIV | Cold War      | -0.304 | -0.842 |
| Largest excluded group, % | PolityIV | post-Cold War | -0.062 | -0.199 |
| Largest excluded group, % | PolityIV | Third wave    | -0.083 | -0.349 |
| Largest excluded group, % | V-Dem    | all years     | 0.104  | 0.536  |
| Largest excluded group, % | V-Dem    | Cold War      | 0.478  | 1.145  |
| Largest excluded group, % | V-Dem    | post-Cold War | 0.058  | 0.262  |
| Largest excluded group, % | V-Dem    | Third wave    | 0.120  | 0.625  |
| Former colony             | ACLP     | all years     | -0.276 | -0.626 |
| Former colony             | ACLP     | Cold War      | -0.808 | -1.221 |
| Former colony             | ACLP     | post-Cold War | 0.230  | 0.418  |
| Former colony             | ACLP     | Third wave    | -0.032 | -0.065 |
| Former colony             | BMR      | all years     | 0.060  | 0.144  |
| Former colony             | BMR      | Cold War      | -0.484 | -0.849 |
| Former colony             | BMR      | post-Cold War | 0.709  | 1.271  |
| Former colony             | BMR      | Third wave    | 0.322  | 0.695  |
| Former colony             | PolityIV | all years     | -0.331 | -0.742 |
| Former colony             | PolityIV | Cold War      | -0.542 | -0.728 |
| Former colony             | PolityIV | post-Cold War | -0.051 | -0.092 |
| Former colony             | PolityIV | Third wave    | -0.195 | -0.392 |
| Former colony             | V-Dem    | all years     | -0.618 | -1.773 |
| Former colony             | V-Dem    | Cold War      | -3.266 | -3.005 |
| Former colony             | V-Dem    | post-Cold War | 0.123  | 0.323  |
| Former colony             | V-Dem    | Third wave    | -0.074 | -0.211 |
| British colony            | ACLP     | all years     | 0.452  | 1.354  |
| British colony            | ACLP     | Cold War      | 0.432  | 0.922  |
| British colony            | ACLP     | post-Cold War | 0.518  | 0.991  |
| British colony            | ACLP     | Third wave    | 0.222  | 0.628  |
| British colony            | BMR      | all years     | 0.272  | 0.863  |
| British colony            | BMR      | Cold War      | 0.354  | 0.852  |
| British colony            | BMR      | post-Cold War | 0.197  | 0.411  |
| British colony            | BMR      | Third wave    | 0.039  | 0.108  |
| British colony            | PolityIV | all years     | -0.268 | -0.711 |
| British colony            | PolityIV | Cold War      | -0.064 | -0.119 |
| British colony            | PolityIV | post-Cold War | -0.402 | -0.861 |
| British colony            | PolityIV | Third wave    | -0.510 | -1.204 |
| British colony            | V-Dem    | all years     | -0.084 | -0.293 |
| British colony            | V-Dem    | Cold War      | -0.618 | -1.074 |
| British colony            | V-Dem    | post-Cold War | 0.076  | 0.230  |
| British colony            | V-Dem    | Third wave    | -0.065 | -0.239 |

|                       |          |               |        |        |
|-----------------------|----------|---------------|--------|--------|
| Spanish colony        | ACLP     | all years     | -0.235 | -0.660 |
| Spanish colony        | ACLP     | Cold War      | -0.399 | -0.954 |
| Spanish colony        | ACLP     | post-Cold War | 1.223  | 1.191  |
| Spanish colony        | ACLP     | Third wave    | 0.399  | 0.914  |
| Spanish colony        | BMR      | all years     | -0.256 | -0.763 |
| Spanish colony        | BMR      | Cold War      | -0.248 | -0.626 |
| Spanish colony        | BMR      | post-Cold War | 0.198  | 0.325  |
| Spanish colony        | BMR      | Third wave    | 0.187  | 0.512  |
| Spanish colony        | PolityIV | all years     | 0.186  | 0.472  |
| Spanish colony        | PolityIV | Cold War      | -0.092 | -0.162 |
| Spanish colony        | PolityIV | post-Cold War | 0.471  | 0.868  |
| Spanish colony        | PolityIV | Third wave    | 0.355  | 0.853  |
| Spanish colony        | V-Dem    | all years     | 0.009  | 0.029  |
| Spanish colony        | V-Dem    | Cold War      | -0.976 | -1.674 |
| Spanish colony        | V-Dem    | post-Cold War | 0.681  | 1.613  |
| Spanish colony        | V-Dem    | Third wave    | 0.350  | 1.089  |
| French colony         | ACLP     | all years     | -0.363 | -1.160 |
| French colony         | ACLP     | Cold War      | -0.711 | -1.808 |
| French colony         | ACLP     | post-Cold War | -0.558 | -1.292 |
| French colony         | ACLP     | Third wave    | -0.457 | -1.210 |
| French colony         | BMR      | all years     | -0.126 | -0.377 |
| French colony         | BMR      | Cold War      | -1.164 | -2.672 |
| French colony         | BMR      | post-Cold War | -0.003 | -0.006 |
| French colony         | BMR      | Third wave    | -0.156 | -0.381 |
| French colony         | PolityIV | all years     | -0.281 | -0.683 |
| French colony         | PolityIV | Cold War      | -1.480 | -1.567 |
| French colony         | PolityIV | post-Cold War | -0.133 | -0.268 |
| French colony         | PolityIV | Third wave    | -0.096 | -0.215 |
| French colony         | V-Dem    | all years     | -0.454 | -1.438 |
| French colony         | V-Dem    | Cold War      | -0.513 | -1.037 |
| French colony         | V-Dem    | post-Cold War | -0.314 | -0.823 |
| French colony         | V-Dem    | Third wave    | -0.174 | -0.542 |
| Political corruption  | ACLP     | all years     | -0.423 | -2.203 |
| Political corruption  | ACLP     | Cold War      | -0.447 | -2.001 |
| Political corruption  | ACLP     | post-Cold War | -1.101 | -2.848 |
| Political corruption  | ACLP     | Third wave    | -0.522 | -1.725 |
| Political corruption  | BMR      | all years     | -0.464 | -2.594 |
| Political corruption  | BMR      | Cold War      | -0.476 | -2.432 |
| Political corruption  | BMR      | post-Cold War | -1.033 | -2.286 |
| Political corruption  | BMR      | Third wave    | -0.592 | -2.165 |
| Political corruption  | PolityIV | all years     | -0.669 | -4.188 |
| Political corruption  | PolityIV | Cold War      | -0.868 | -3.571 |
| Political corruption  | PolityIV | post-Cold War | -0.735 | -2.166 |
| Political corruption  | PolityIV | Third wave    | -0.737 | -2.801 |
| Political corruption  | V-Dem    | all years     | -0.740 | -4.193 |
| Political corruption  | V-Dem    | Cold War      | -0.509 | -1.701 |
| Political corruption  | V-Dem    | post-Cold War | -1.042 | -3.690 |
| Political corruption  | V-Dem    | Third wave    | -0.669 | -3.290 |
| Impartial public adm. | ACLP     | all years     | 0.774  | 3.841  |
| Impartial public adm. | ACLP     | Cold War      | 0.929  | 3.918  |
| Impartial public adm. | ACLP     | post-Cold War | 0.556  | 1.370  |
| Impartial public adm. | ACLP     | Third wave    | 0.987  | 3.578  |
| Impartial public adm. | BMR      | all years     | 1.042  | 3.956  |
| Impartial public adm. | BMR      | Cold War      | 1.024  | 3.923  |

|                            |          |               |        |        |
|----------------------------|----------|---------------|--------|--------|
| Impartial public adm.      | BMR      | post-Cold War | 1.271  | 2.626  |
| Impartial public adm.      | BMR      | Third wave    | 1.372  | 4.212  |
| Impartial public adm.      | PolityIV | all years     | 1.346  | 4.320  |
| Impartial public adm.      | PolityIV | Cold War      | 1.409  | 4.242  |
| Impartial public adm.      | PolityIV | post-Cold War | 1.353  | 2.690  |
| Impartial public adm.      | PolityIV | Third wave    | 1.275  | 2.914  |
| Impartial public adm.      | V-Dem    | all years     | 1.515  | 5.877  |
| Impartial public adm.      | V-Dem    | Cold War      | 1.474  | 4.632  |
| Impartial public adm.      | V-Dem    | post-Cold War | 1.657  | 3.684  |
| Impartial public adm.      | V-Dem    | Third wave    | 1.323  | 4.331  |
| Investment profile index   | ACLP     | all years     | 0.337  | 1.971  |
| Investment profile index   | ACLP     | Cold War      | 0.475  | 1.966  |
| Investment profile index   | ACLP     | post-Cold War | 0.046  | 0.194  |
| Investment profile index   | ACLP     | Third wave    | 0.310  | 1.494  |
| Investment profile index   | BMR      | all years     | 0.453  | 2.585  |
| Investment profile index   | BMR      | Cold War      | 0.548  | 2.440  |
| Investment profile index   | BMR      | post-Cold War | 0.349  | 1.127  |
| Investment profile index   | BMR      | Third wave    | 0.461  | 2.002  |
| Investment profile index   | PolityIV | all years     | 0.483  | 2.728  |
| Investment profile index   | PolityIV | Cold War      | 0.621  | 2.034  |
| Investment profile index   | PolityIV | post-Cold War | 0.590  | 2.135  |
| Investment profile index   | PolityIV | Third wave    | 0.493  | 2.309  |
| Investment profile index   | V-Dem    | all years     | 0.185  | 1.144  |
| Investment profile index   | V-Dem    | Cold War      | 0.488  | 1.579  |
| Investment profile index   | V-Dem    | post-Cold War | 0.187  | 0.900  |
| Investment profile index   | V-Dem    | Third wave    | 0.217  | 1.296  |
| Length of executive tenure | ACLP     | all years     | -0.006 | -0.037 |
| Length of executive tenure | ACLP     | Cold War      | 0.029  | 0.126  |
| Length of executive tenure | ACLP     | post-Cold War | -0.072 | -0.360 |
| Length of executive tenure | ACLP     | Third wave    | 0.011  | 0.074  |
| Length of executive tenure | BMR      | all years     | -0.277 | -1.822 |
| Length of executive tenure | BMR      | Cold War      | -0.130 | -0.572 |
| Length of executive tenure | BMR      | post-Cold War | -0.593 | -2.896 |
| Length of executive tenure | BMR      | Third wave    | -0.357 | -2.204 |
| Length of executive tenure | PolityIV | all years     | -0.136 | -0.851 |
| Length of executive tenure | PolityIV | Cold War      | 0.210  | 0.767  |
| Length of executive tenure | PolityIV | post-Cold War | -0.455 | -2.372 |
| Length of executive tenure | PolityIV | Third wave    | -0.249 | -1.478 |
| Length of executive tenure | V-Dem    | all years     | -0.245 | -1.981 |
| Length of executive tenure | V-Dem    | Cold War      | -0.112 | -0.501 |
| Length of executive tenure | V-Dem    | post-Cold War | -0.346 | -2.406 |
| Length of executive tenure | V-Dem    | Third wave    | -0.249 | -1.846 |
| Previous military regime   | ACLP     | all years     | 0.354  | 2.572  |
| Previous military regime   | ACLP     | Cold War      | 0.396  | 1.579  |
| Previous military regime   | ACLP     | post-Cold War | 0.285  | 1.636  |
| Previous military regime   | ACLP     | Third wave    | 0.372  | 2.658  |
| Previous military regime   | BMR      | all years     | 0.080  | 0.430  |
| Previous military regime   | BMR      | Cold War      | -0.001 | -0.002 |
| Previous military regime   | BMR      | post-Cold War | -0.036 | -0.155 |
| Previous military regime   | BMR      | Third wave    | 0.081  | 0.406  |
| Previous military regime   | PolityIV | all years     | 0.390  | 2.741  |
| Previous military regime   | PolityIV | Cold War      | 0.260  | 0.989  |
| Previous military regime   | PolityIV | post-Cold War | 0.431  | 2.690  |
| Previous military regime   | PolityIV | Third wave    | 0.468  | 3.208  |

|                          |          |               |        |        |
|--------------------------|----------|---------------|--------|--------|
| Previous military regime | V-Dem    | all years     | 0.214  | 1.745  |
| Previous military regime | V-Dem    | Cold War      | 0.103  | 0.341  |
| Previous military regime | V-Dem    | post-Cold War | 0.269  | 1.896  |
| Previous military regime | V-Dem    | Third wave    | 0.221  | 1.828  |
| Time since ILC           | ACLP     | all years     | -0.752 | -2.152 |
| Time since ILC           | ACLP     | Cold War      | -0.849 | -1.729 |
| Time since ILC           | ACLP     | post-Cold War | -0.500 | -1.231 |
| Time since ILC           | ACLP     | Third wave    | -0.861 | -2.567 |
| Time since ILC           | BMR      | all years     | -0.731 | -2.044 |
| Time since ILC           | BMR      | Cold War      | -0.534 | -1.062 |
| Time since ILC           | BMR      | post-Cold War | -0.902 | -2.149 |
| Time since ILC           | BMR      | Third wave    | -0.914 | -2.522 |
| Time since ILC           | PolityIV | all years     | -0.612 | -1.835 |
| Time since ILC           | PolityIV | Cold War      | -0.913 | -1.557 |
| Time since ILC           | PolityIV | post-Cold War | -0.383 | -0.897 |
| Time since ILC           | PolityIV | Third wave    | -0.644 | -1.811 |
| Time since ILC           | V-Dem    | all years     | -0.230 | -0.704 |
| Time since ILC           | V-Dem    | Cold War      | -1.015 | -1.682 |
| Time since ILC           | V-Dem    | post-Cold War | 0.214  | 0.493  |
| Time since ILC           | V-Dem    | Third wave    | -0.033 | -0.103 |
| Assassinations           | ACLP     | all years     | -0.140 | -1.894 |
| Assassinations           | ACLP     | Cold War      | -0.177 | -2.226 |
| Assassinations           | ACLP     | post-Cold War | -0.058 | -0.386 |
| Assassinations           | ACLP     | Third wave    | -0.170 | -1.936 |
| Assassinations           | BMR      | all years     | -0.152 | -2.230 |
| Assassinations           | BMR      | Cold War      | -0.171 | -2.295 |
| Assassinations           | BMR      | post-Cold War | -0.097 | -0.767 |
| Assassinations           | BMR      | Third wave    | -0.168 | -2.233 |
| Assassinations           | PolityIV | all years     | 0.012  | 0.092  |
| Assassinations           | PolityIV | Cold War      | -0.172 | -1.136 |
| Assassinations           | PolityIV | post-Cold War | 0.281  | 1.422  |
| Assassinations           | PolityIV | Third wave    | 0.055  | 0.347  |
| Assassinations           | V-Dem    | all years     | -0.012 | -0.131 |
| Assassinations           | V-Dem    | Cold War      | -0.108 | -0.877 |
| Assassinations           | V-Dem    | post-Cold War | 0.043  | 0.350  |
| Assassinations           | V-Dem    | Third wave    | -0.027 | -0.276 |
| Strikes                  | ACLP     | all years     | -0.080 | -0.964 |
| Strikes                  | ACLP     | Cold War      | -0.090 | -0.799 |
| Strikes                  | ACLP     | post-Cold War | -0.049 | -0.407 |
| Strikes                  | ACLP     | Third wave    | -0.042 | -0.487 |
| Strikes                  | BMR      | all years     | -0.114 | -1.440 |
| Strikes                  | BMR      | Cold War      | -0.106 | -1.051 |
| Strikes                  | BMR      | post-Cold War | -0.109 | -0.743 |
| Strikes                  | BMR      | Third wave    | -0.093 | -1.013 |
| Strikes                  | PolityIV | all years     | 0.003  | 0.032  |
| Strikes                  | PolityIV | Cold War      | -0.016 | -0.104 |
| Strikes                  | PolityIV | post-Cold War | 0.011  | 0.072  |
| Strikes                  | PolityIV | Third wave    | 0.003  | 0.023  |
| Strikes                  | V-Dem    | all years     | 0.014  | 0.147  |
| Strikes                  | V-Dem    | Cold War      | -0.179 | -1.725 |
| Strikes                  | V-Dem    | post-Cold War | 0.207  | 1.456  |
| Strikes                  | V-Dem    | Third wave    | 0.103  | 1.103  |
| Riots                    | ACLP     | all years     | -0.137 | -1.119 |
| Riots                    | ACLP     | Cold War      | -0.094 | -0.657 |



|                     |          |               |        |        |
|---------------------|----------|---------------|--------|--------|
| Riots               | ACLP     | post-Cold War | -0.228 | -1.622 |
| Riots               | ACLP     | Third wave    | -0.198 | -1.421 |
| Riots               | BMR      | all years     | -0.208 | -1.833 |
| Riots               | BMR      | Cold War      | -0.165 | -1.357 |
| Riots               | BMR      | post-Cold War | -0.324 | -2.103 |
| Riots               | BMR      | Third wave    | -0.295 | -2.232 |
| Riots               | PolityIV | all years     | -0.204 | -1.401 |
| Riots               | PolityIV | Cold War      | -0.256 | -1.573 |
| Riots               | PolityIV | post-Cold War | -0.208 | -1.063 |
| Riots               | PolityIV | Third wave    | -0.214 | -1.260 |
| Riots               | V-Dem    | all years     | -0.088 | -0.898 |
| Riots               | V-Dem    | Cold War      | -0.142 | -1.182 |
| Riots               | V-Dem    | post-Cold War | -0.161 | -1.123 |
| Riots               | V-Dem    | Third wave    | -0.137 | -1.247 |
| Demonstrations      | ACLP     | all years     | -0.092 | -0.680 |
| Demonstrations      | ACLP     | Cold War      | -0.046 | -0.232 |
| Demonstrations      | ACLP     | post-Cold War | -0.186 | -1.286 |
| Demonstrations      | ACLP     | Third wave    | -0.124 | -0.921 |
| Demonstrations      | BMR      | all years     | -0.140 | -1.022 |
| Demonstrations      | BMR      | Cold War      | -0.127 | -0.738 |
| Demonstrations      | BMR      | post-Cold War | -0.156 | -0.971 |
| Demonstrations      | BMR      | Third wave    | -0.141 | -0.962 |
| Demonstrations      | PolityIV | all years     | -0.224 | -1.576 |
| Demonstrations      | PolityIV | Cold War      | -0.299 | -1.530 |
| Demonstrations      | PolityIV | post-Cold War | -0.180 | -1.089 |
| Demonstrations      | PolityIV | Third wave    | -0.202 | -1.228 |
| Demonstrations      | V-Dem    | all years     | 0.004  | 0.033  |
| Demonstrations      | V-Dem    | Cold War      | -0.057 | -0.275 |
| Demonstrations      | V-Dem    | post-Cold War | 0.003  | 0.016  |
| Demonstrations      | V-Dem    | Third wave    | 0.032  | 0.223  |
| Nonviolent campaign | ACLP     | all years     | -0.245 | -0.442 |
| Nonviolent campaign | ACLP     | Cold War      | -0.461 | -0.611 |
| Nonviolent campaign | ACLP     | post-Cold War | -0.211 | -0.267 |
| Nonviolent campaign | ACLP     | Third wave    | -0.089 | -0.140 |
| Nonviolent campaign | BMR      | all years     | -0.403 | -0.737 |
| Nonviolent campaign | BMR      | Cold War      | -0.429 | -0.560 |
| Nonviolent campaign | BMR      | post-Cold War | -0.386 | -0.525 |
| Nonviolent campaign | BMR      | Third wave    | -0.322 | -0.531 |
| Nonviolent campaign | PolityIV | all years     | -0.355 | -0.629 |
| Nonviolent campaign | PolityIV | Cold War      | -0.415 | -0.417 |
| Nonviolent campaign | PolityIV | post-Cold War | -0.272 | -0.371 |
| Nonviolent campaign | PolityIV | Third wave    | -0.072 | -0.105 |
| Nonviolent campaign | V-Dem    | all years     | -0.137 | -0.216 |
| Nonviolent campaign | V-Dem    | Cold War      | 13.307 | 23.010 |
| Nonviolent campaign | V-Dem    | post-Cold War | -0.148 | -0.236 |
| Nonviolent campaign | V-Dem    | Third wave    | -0.085 | -0.144 |
| Minor civil war     | ACLP     | all years     | -0.322 | -0.835 |
| Minor civil war     | ACLP     | Cold War      | 0.514  | 0.937  |
| Minor civil war     | ACLP     | post-Cold War | -1.216 | -2.889 |
| Minor civil war     | ACLP     | Third wave    | -0.814 | -2.284 |
| Minor civil war     | BMR      | all years     | -0.538 | -1.272 |
| Minor civil war     | BMR      | Cold War      | 0.116  | 0.216  |
| Minor civil war     | BMR      | post-Cold War | -1.270 | -2.661 |
| Minor civil war     | BMR      | Third wave    | -1.081 | -2.656 |

|                  |          |               |        |        |
|------------------|----------|---------------|--------|--------|
| Minor civil war  | PolityIV | all years     | -0.508 | -1.170 |
| Minor civil war  | PolityIV | Cold War      | 0.897  | 0.958  |
| Minor civil war  | PolityIV | post-Cold War | -1.300 | -2.618 |
| Minor civil war  | PolityIV | Third wave    | -1.045 | -2.534 |
| Minor civil war  | V-Dem    | all years     | -0.485 | -1.046 |
| Minor civil war  | V-Dem    | Cold War      | -0.140 | -0.153 |
| Minor civil war  | V-Dem    | post-Cold War | -0.670 | -1.386 |
| Minor civil war  | V-Dem    | Third wave    | -0.558 | -1.298 |
| Major civil war  | ACLP     | all years     | -0.447 | -1.059 |
| Major civil war  | ACLP     | Cold War      | -0.888 | -2.088 |
| Major civil war  | ACLP     | post-Cold War | 13.676 | 26.061 |
| Major civil war  | ACLP     | Third wave    | -0.044 | -0.073 |
| Major civil war  | BMR      | all years     | -0.485 | -1.190 |
| Major civil war  | BMR      | Cold War      | -0.521 | -1.121 |
| Major civil war  | BMR      | post-Cold War | -0.025 | -0.031 |
| Major civil war  | BMR      | Third wave    | -0.379 | -0.756 |
| Major civil war  | PolityIV | all years     | -1.008 | -2.506 |
| Major civil war  | PolityIV | Cold War      | -1.110 | -2.055 |
| Major civil war  | PolityIV | post-Cold War | -0.614 | -0.765 |
| Major civil war  | PolityIV | Third wave    | -0.500 | -0.864 |
| Major civil war  | V-Dem    | all years     | -0.777 | -1.555 |
| Major civil war  | V-Dem    | Cold War      | -0.665 | -0.734 |
| Major civil war  | V-Dem    | post-Cold War | -0.683 | -1.067 |
| Major civil war  | V-Dem    | Third wave    | -0.666 | -1.292 |
| Ethnic civil war | ACLP     | all years     | 0.045  | 0.116  |
| Ethnic civil war | ACLP     | Cold War      | 0.319  | 0.584  |
| Ethnic civil war | ACLP     | post-Cold War | -0.320 | -0.578 |
| Ethnic civil war | ACLP     | Third wave    | -0.070 | -0.165 |
| Ethnic civil war | BMR      | all years     | -0.289 | -0.753 |
| Ethnic civil war | BMR      | Cold War      | 0.272  | 0.554  |
| Ethnic civil war | BMR      | post-Cold War | -0.851 | -1.626 |
| Ethnic civil war | BMR      | Third wave    | -0.497 | -1.267 |
| Ethnic civil war | PolityIV | all years     | -0.474 | -1.062 |
| Ethnic civil war | PolityIV | Cold War      | -0.073 | -0.118 |
| Ethnic civil war | PolityIV | post-Cold War | -0.655 | -1.163 |
| Ethnic civil war | PolityIV | Third wave    | -0.582 | -1.303 |
| Ethnic civil war | V-Dem    | all years     | -0.041 | -0.075 |
| Ethnic civil war | V-Dem    | Cold War      | 14.960 | 19.690 |
| Ethnic civil war | V-Dem    | post-Cold War | -0.492 | -0.997 |
| Ethnic civil war | V-Dem    | Third wave    | -0.058 | -0.113 |
| Population       | ACLP     | all years     | 0.389  | 2.532  |
| Population       | ACLP     | Cold War      | 0.594  | 2.821  |
| Population       | ACLP     | post-Cold War | 0.133  | 0.658  |
| Population       | ACLP     | Third wave    | 0.265  | 1.538  |
| Population       | BMR      | all years     | 0.334  | 1.944  |
| Population       | BMR      | Cold War      | 0.449  | 2.108  |
| Population       | BMR      | post-Cold War | 0.182  | 0.727  |
| Population       | BMR      | Third wave    | 0.268  | 1.358  |
| Population       | PolityIV | all years     | -0.049 | -0.348 |
| Population       | PolityIV | Cold War      | 0.089  | 0.407  |
| Population       | PolityIV | post-Cold War | -0.148 | -0.823 |
| Population       | PolityIV | Third wave    | -0.141 | -0.882 |
| Population       | V-Dem    | all years     | 0.003  | 0.022  |
| Population       | V-Dem    | Cold War      | 0.225  | 0.939  |

|                               |          |               |        |        |
|-------------------------------|----------|---------------|--------|--------|
| Population                    | V-Dem    | post-Cold War | -0.112 | -0.803 |
| Population                    | V-Dem    | Third wave    | -0.050 | -0.425 |
| Population density            | ACLP     | all years     | 0.135  | 0.796  |
| Population density            | ACLP     | Cold War      | 0.125  | 0.611  |
| Population density            | ACLP     | post-Cold War | 0.150  | 0.569  |
| Population density            | ACLP     | Third wave    | 0.130  | 0.666  |
| Population density            | BMR      | all years     | -0.180 | -0.960 |
| Population density            | BMR      | Cold War      | -0.150 | -0.692 |
| Population density            | BMR      | post-Cold War | -0.231 | -0.900 |
| Population density            | BMR      | Third wave    | -0.212 | -1.058 |
| Population density            | PolityIV | all years     | -0.105 | -0.645 |
| Population density            | PolityIV | Cold War      | -0.070 | -0.330 |
| Population density            | PolityIV | post-Cold War | -0.118 | -0.601 |
| Population density            | PolityIV | Third wave    | -0.172 | -1.021 |
| Population density            | V-Dem    | all years     | 0.011  | 0.089  |
| Population density            | V-Dem    | Cold War      | 0.213  | 1.167  |
| Population density            | V-Dem    | post-Cold War | -0.084 | -0.546 |
| Population density            | V-Dem    | Third wave    | 0.009  | 0.069  |
| Population aged 0-14 years, % | ACLP     | all years     | -0.430 | -1.538 |
| Population aged 0-14 years, % | ACLP     | Cold War      | -0.494 | -1.262 |
| Population aged 0-14 years, % | ACLP     | post-Cold War | -0.324 | -0.776 |
| Population aged 0-14 years, % | ACLP     | Third wave    | -0.532 | -1.508 |
| Population aged 0-14 years, % | BMR      | all years     | -0.089 | -0.296 |
| Population aged 0-14 years, % | BMR      | Cold War      | 0.005  | 0.014  |
| Population aged 0-14 years, % | BMR      | post-Cold War | -0.148 | -0.330 |
| Population aged 0-14 years, % | BMR      | Third wave    | -0.227 | -0.603 |
| Population aged 0-14 years, % | PolityIV | all years     | -0.065 | -0.240 |
| Population aged 0-14 years, % | PolityIV | Cold War      | -0.787 | -1.772 |
| Population aged 0-14 years, % | PolityIV | post-Cold War | 0.234  | 0.774  |
| Population aged 0-14 years, % | PolityIV | Third wave    | 0.088  | 0.283  |
| Population aged 0-14 years, % | V-Dem    | all years     | -0.134 | -0.564 |
| Population aged 0-14 years, % | V-Dem    | Cold War      | -1.175 | -2.140 |
| Population aged 0-14 years, % | V-Dem    | post-Cold War | 0.250  | 1.122  |
| Population aged 0-14 years, % | V-Dem    | Third wave    | 0.044  | 0.198  |
| Ethnic fractionalization      | ACLP     | all years     | -0.276 | -1.637 |
| Ethnic fractionalization      | ACLP     | Cold War      | -0.336 | -1.388 |
| Ethnic fractionalization      | ACLP     | post-Cold War | -0.388 | -1.288 |
| Ethnic fractionalization      | ACLP     | Third wave    | -0.478 | -2.199 |
| Ethnic fractionalization      | BMR      | all years     | -0.160 | -0.925 |
| Ethnic fractionalization      | BMR      | Cold War      | -0.277 | -1.233 |
| Ethnic fractionalization      | BMR      | post-Cold War | -0.143 | -0.564 |
| Ethnic fractionalization      | BMR      | Third wave    | -0.248 | -1.187 |
| Ethnic fractionalization      | PolityIV | all years     | -0.022 | -0.140 |
| Ethnic fractionalization      | PolityIV | Cold War      | 0.103  | 0.420  |
| Ethnic fractionalization      | PolityIV | post-Cold War | -0.026 | -0.129 |
| Ethnic fractionalization      | PolityIV | Third wave    | -0.022 | -0.123 |
| Ethnic fractionalization      | V-Dem    | all years     | -0.291 | -1.793 |
| Ethnic fractionalization      | V-Dem    | Cold War      | -0.353 | -1.227 |
| Ethnic fractionalization      | V-Dem    | post-Cold War | -0.157 | -0.867 |
| Ethnic fractionalization      | V-Dem    | Third wave    | -0.195 | -1.187 |
| Linguistic fractionalization  | ACLP     | all years     | -0.054 | -0.381 |
| Linguistic fractionalization  | ACLP     | Cold War      | -0.088 | -0.444 |
| Linguistic fractionalization  | ACLP     | post-Cold War | -0.168 | -0.754 |
| Linguistic fractionalization  | ACLP     | Third wave    | -0.168 | -1.002 |

|                              |          |               |        |        |
|------------------------------|----------|---------------|--------|--------|
| Linguistic fractionalization | BMR      | all years     | -0.050 | -0.361 |
| Linguistic fractionalization | BMR      | Cold War      | -0.092 | -0.529 |
| Linguistic fractionalization | BMR      | post-Cold War | -0.137 | -0.660 |
| Linguistic fractionalization | BMR      | Third wave    | -0.133 | -0.822 |
| Linguistic fractionalization | PolityIV | all years     | -0.023 | -0.161 |
| Linguistic fractionalization | PolityIV | Cold War      | 0.102  | 0.438  |
| Linguistic fractionalization | PolityIV | post-Cold War | -0.081 | -0.504 |
| Linguistic fractionalization | PolityIV | Third wave    | -0.060 | -0.384 |
| Linguistic fractionalization | V-Dem    | all years     | -0.189 | -1.306 |
| Linguistic fractionalization | V-Dem    | Cold War      | -0.014 | -0.046 |
| Linguistic fractionalization | V-Dem    | post-Cold War | -0.171 | -1.099 |
| Linguistic fractionalization | V-Dem    | Third wave    | -0.127 | -0.941 |
| Religious fractionalization  | ACLP     | all years     | 0.087  | 0.559  |
| Religious fractionalization  | ACLP     | Cold War      | -0.157 | -0.821 |
| Religious fractionalization  | ACLP     | post-Cold War | 0.372  | 1.512  |
| Religious fractionalization  | ACLP     | Third wave    | 0.103  | 0.505  |
| Religious fractionalization  | BMR      | all years     | 0.048  | 0.354  |
| Religious fractionalization  | BMR      | Cold War      | -0.168 | -0.983 |
| Religious fractionalization  | BMR      | post-Cold War | 0.281  | 1.226  |
| Religious fractionalization  | BMR      | Third wave    | 0.034  | 0.202  |
| Religious fractionalization  | PolityIV | all years     | -0.061 | -0.464 |
| Religious fractionalization  | PolityIV | Cold War      | -0.251 | -1.218 |
| Religious fractionalization  | PolityIV | post-Cold War | 0.091  | 0.506  |
| Religious fractionalization  | PolityIV | Third wave    | 0.012  | 0.077  |
| Religious fractionalization  | V-Dem    | all years     | -0.058 | -0.443 |
| Religious fractionalization  | V-Dem    | Cold War      | -0.025 | -0.095 |
| Religious fractionalization  | V-Dem    | post-Cold War | -0.072 | -0.439 |
| Religious fractionalization  | V-Dem    | Third wave    | -0.065 | -0.486 |
| Nr. relevant groups          | ACLP     | all years     | 0.119  | 0.451  |
| Nr. relevant groups          | ACLP     | Cold War      | 0.040  | 0.134  |
| Nr. relevant groups          | ACLP     | post-Cold War | 0.294  | 0.918  |
| Nr. relevant groups          | ACLP     | Third wave    | -0.054 | -0.187 |
| Nr. relevant groups          | BMR      | all years     | -0.348 | -3.505 |
| Nr. relevant groups          | BMR      | Cold War      | -0.351 | -3.364 |
| Nr. relevant groups          | BMR      | post-Cold War | -0.328 | -2.207 |
| Nr. relevant groups          | BMR      | Third wave    | -0.377 | -4.455 |
| Nr. relevant groups          | PolityIV | all years     | 0.104  | 0.336  |
| Nr. relevant groups          | PolityIV | Cold War      | 0.342  | 1.068  |
| Nr. relevant groups          | PolityIV | post-Cold War | -0.026 | -0.077 |
| Nr. relevant groups          | PolityIV | Third wave    | -0.007 | -0.021 |
| Nr. relevant groups          | V-Dem    | all years     | -0.044 | -0.182 |
| Nr. relevant groups          | V-Dem    | Cold War      | 0.518  | 1.657  |
| Nr. relevant groups          | V-Dem    | post-Cold War | -0.232 | -1.016 |
| Nr. relevant groups          | V-Dem    | Third wave    | -0.088 | -0.382 |
| Catholic population, %       | ACLP     | all years     | -0.003 | -0.023 |
| Catholic population, %       | ACLP     | Cold War      | -0.089 | -0.527 |
| Catholic population, %       | ACLP     | post-Cold War | 0.390  | 1.290  |
| Catholic population, %       | ACLP     | Third wave    | 0.234  | 1.412  |
| Catholic population, %       | BMR      | all years     | 0.029  | 0.211  |
| Catholic population, %       | BMR      | Cold War      | -0.008 | -0.051 |
| Catholic population, %       | BMR      | post-Cold War | 0.314  | 1.272  |
| Catholic population, %       | BMR      | Third wave    | 0.232  | 1.609  |
| Catholic population, %       | PolityIV | all years     | 0.144  | 0.908  |
| Catholic population, %       | PolityIV | Cold War      | 0.079  | 0.364  |

|                          |          |               |        |        |
|--------------------------|----------|---------------|--------|--------|
| Catholic population, %   | PolityIV | post-Cold War | 0.190  | 0.913  |
| Catholic population, %   | PolityIV | Third wave    | 0.216  | 1.246  |
| Catholic population, %   | V-Dem    | all years     | 0.159  | 1.245  |
| Catholic population, %   | V-Dem    | Cold War      | -0.041 | -0.170 |
| Catholic population, %   | V-Dem    | post-Cold War | 0.228  | 1.550  |
| Catholic population, %   | V-Dem    | Third wave    | 0.195  | 1.528  |
| Muslim population, %     | ACLP     | all years     | -0.058 | -0.501 |
| Muslim population, %     | ACLP     | Cold War      | 0.046  | 0.288  |
| Muslim population, %     | ACLP     | post-Cold War | -0.240 | -1.363 |
| Muslim population, %     | ACLP     | Third wave    | -0.241 | -1.856 |
| Muslim population, %     | BMR      | all years     | -0.185 | -1.701 |
| Muslim population, %     | BMR      | Cold War      | -0.144 | -0.861 |
| Muslim population, %     | BMR      | post-Cold War | -0.327 | -1.886 |
| Muslim population, %     | BMR      | Third wave    | -0.278 | -2.299 |
| Muslim population, %     | PolityIV | all years     | -0.242 | -1.864 |
| Muslim population, %     | PolityIV | Cold War      | -0.166 | -0.817 |
| Muslim population, %     | PolityIV | post-Cold War | -0.263 | -1.503 |
| Muslim population, %     | PolityIV | Third wave    | -0.308 | -2.170 |
| Muslim population, %     | V-Dem    | all years     | -0.314 | -2.635 |
| Muslim population, %     | V-Dem    | Cold War      | -0.281 | -1.438 |
| Muslim population, %     | V-Dem    | post-Cold War | -0.246 | -1.512 |
| Muslim population, %     | V-Dem    | Third wave    | -0.253 | -1.918 |
| Protestant population, % | ACLP     | all years     | 0.138  | 0.838  |
| Protestant population, % | ACLP     | Cold War      | 0.128  | 0.664  |
| Protestant population, % | ACLP     | post-Cold War | 0.148  | 0.532  |
| Protestant population, % | ACLP     | Third wave    | 0.096  | 0.461  |
| Protestant population, % | BMR      | all years     | 0.210  | 1.449  |
| Protestant population, % | BMR      | Cold War      | 0.143  | 0.856  |
| Protestant population, % | BMR      | post-Cold War | 0.331  | 1.171  |
| Protestant population, % | BMR      | Third wave    | 0.143  | 0.793  |
| Protestant population, % | PolityIV | all years     | 0.128  | 0.750  |
| Protestant population, % | PolityIV | Cold War      | 0.175  | 0.850  |
| Protestant population, % | PolityIV | post-Cold War | -0.013 | -0.051 |
| Protestant population, % | PolityIV | Third wave    | -0.004 | -0.020 |
| Protestant population, % | V-Dem    | all years     | 0.013  | 0.112  |
| Protestant population, % | V-Dem    | Cold War      | -0.027 | -0.155 |
| Protestant population, % | V-Dem    | post-Cold War | -0.076 | -0.397 |
| Protestant population, % | V-Dem    | Third wave    | -0.095 | -0.823 |
| Sub-saharan Africa       | ACLP     | all years     | -0.348 | -1.118 |
| Sub-saharan Africa       | ACLP     | Cold War      | -0.634 | -1.306 |
| Sub-saharan Africa       | ACLP     | post-Cold War | -0.734 | -1.451 |
| Sub-saharan Africa       | ACLP     | Third wave    | -0.410 | -1.101 |
| Sub-saharan Africa       | BMR      | all years     | 0.150  | 0.454  |
| Sub-saharan Africa       | BMR      | Cold War      | -0.152 | -0.301 |
| Sub-saharan Africa       | BMR      | post-Cold War | 0.070  | 0.158  |
| Sub-saharan Africa       | BMR      | Third wave    | 0.219  | 0.594  |
| Sub-saharan Africa       | PolityIV | all years     | 0.160  | 0.496  |
| Sub-saharan Africa       | PolityIV | Cold War      | -0.090 | -0.150 |
| Sub-saharan Africa       | PolityIV | post-Cold War | 0.426  | 1.000  |
| Sub-saharan Africa       | PolityIV | Third wave    | 0.331  | 0.910  |
| Sub-saharan Africa       | V-Dem    | all years     | -0.185 | -0.609 |
| Sub-saharan Africa       | V-Dem    | Cold War      | -0.432 | -0.667 |
| Sub-saharan Africa       | V-Dem    | post-Cold War | 0.158  | 0.436  |
| Sub-saharan Africa       | V-Dem    | Third wave    | 0.122  | 0.412  |

|                              |          |               |        |        |
|------------------------------|----------|---------------|--------|--------|
| Central/South America        | ACLP     | all years     | -0.285 | -0.823 |
| Central/South America        | ACLP     | Cold War      | -0.564 | -1.409 |
| Central/South America        | ACLP     | post-Cold War | 1.571  | 1.514  |
| Central/South America        | ACLP     | Third wave    | 0.205  | 0.441  |
| Central/South America        | BMR      | all years     | -0.167 | -0.478 |
| Central/South America        | BMR      | Cold War      | -0.326 | -0.780 |
| Central/South America        | BMR      | post-Cold War | 0.709  | 1.144  |
| Central/South America        | BMR      | Third wave    | 0.230  | 0.564  |
| Central/South America        | PolityIV | all years     | 0.095  | 0.245  |
| Central/South America        | PolityIV | Cold War      | -0.113 | -0.208 |
| Central/South America        | PolityIV | post-Cold War | 0.234  | 0.426  |
| Central/South America        | PolityIV | Third wave    | 0.293  | 0.669  |
| Central/South America        | V-Dem    | all years     | 0.021  | 0.073  |
| Central/South America        | V-Dem    | Cold War      | -1.407 | -2.721 |
| Central/South America        | V-Dem    | post-Cold War | 1.017  | 2.380  |
| Central/South America        | V-Dem    | Third wave    | 0.330  | 1.093  |
| South East Asia              | ACLP     | all years     | 0.152  | 0.345  |
| South East Asia              | ACLP     | Cold War      | 0.749  | 1.514  |
| South East Asia              | ACLP     | post-Cold War | -0.422 | -0.828 |
| South East Asia              | ACLP     | Third wave    | -0.049 | -0.106 |
| South East Asia              | BMR      | all years     | 0.033  | 0.084  |
| South East Asia              | BMR      | Cold War      | 0.361  | 0.821  |
| South East Asia              | BMR      | post-Cold War | -0.294 | -0.562 |
| South East Asia              | BMR      | Third wave    | -0.216 | -0.508 |
| South East Asia              | PolityIV | all years     | -0.595 | -1.437 |
| South East Asia              | PolityIV | Cold War      | -0.317 | -0.577 |
| South East Asia              | PolityIV | post-Cold War | -0.736 | -1.417 |
| South East Asia              | PolityIV | Third wave    | -0.709 | -1.534 |
| South East Asia              | V-Dem    | all years     | -0.288 | -0.824 |
| South East Asia              | V-Dem    | Cold War      | 0.276  | 0.350  |
| South East Asia              | V-Dem    | post-Cold War | -0.465 | -1.290 |
| South East Asia              | V-Dem    | Third wave    | -0.316 | -0.984 |
| Western Europe/North America | ACLP     | all years     | 1.718  | 1.686  |
| Western Europe/North America | ACLP     | Cold War      | 2.091  | 1.904  |
| Western Europe/North America | ACLP     | post-Cold War |        |        |
| Western Europe/North America | ACLP     | Third wave    | 13.523 | 27.683 |
| Western Europe/North America | BMR      | all years     | 2.185  | 2.136  |
| Western Europe/North America | BMR      | Cold War      | 2.469  | 2.277  |
| Western Europe/North America | BMR      | post-Cold War |        |        |
| Western Europe/North America | BMR      | Third wave    | 14.185 | 29.562 |
| Western Europe/North America | PolityIV | all years     | 14.651 | 38.118 |
| Western Europe/North America | PolityIV | Cold War      | 15.869 | 32.573 |
| Western Europe/North America | PolityIV | post-Cold War |        |        |
| Western Europe/North America | PolityIV | Third wave    | 14.260 | 29.703 |
| Western Europe/North America | V-Dem    | all years     | 15.330 | 49.934 |
| Western Europe/North America | V-Dem    | Cold War      | 16.922 | 36.250 |
| Western Europe/North America | V-Dem    | post-Cold War |        |        |
| Western Europe/North America | V-Dem    | Third wave    | 14.746 | 38.364 |
| Eastern Europe/former USSR   | ACLP     | all years     | 1.553  | 1.548  |
| Eastern Europe/former USSR   | ACLP     | Cold War      | 9.566  | 7.829  |
| Eastern Europe/former USSR   | ACLP     | post-Cold War | 1.366  | 1.306  |
| Eastern Europe/former USSR   | ACLP     | Third wave    | 1.565  | 1.550  |
| Eastern Europe/former USSR   | BMR      | all years     | 0.501  | 0.942  |
| Eastern Europe/former USSR   | BMR      | Cold War      | 10.611 | 8.358  |

|                                  |          |               |        |        |
|----------------------------------|----------|---------------|--------|--------|
| Eastern Europe/former USSR       | BMR      | post-Cold War | 0.165  | 0.237  |
| Eastern Europe/former USSR       | BMR      | Third wave    | 0.519  | 0.938  |
| Eastern Europe/former USSR       | PolityIV | all years     | -0.303 | -0.530 |
| Eastern Europe/former USSR       | PolityIV | Cold War      |        |        |
| Eastern Europe/former USSR       | PolityIV | post-Cold War | -0.164 | -0.256 |
| Eastern Europe/former USSR       | PolityIV | Third wave    | -0.206 | -0.349 |
| Eastern Europe/former USSR       | V-Dem    | all years     | -0.484 | -1.257 |
| Eastern Europe/former USSR       | V-Dem    | Cold War      |        |        |
| Eastern Europe/former USSR       | V-Dem    | post-Cold War | -0.315 | -0.758 |
| Eastern Europe/former USSR       | V-Dem    | Third wave    | -0.384 | -1.004 |
| Middle East/North Africa         | ACLP     | all years     | 0.067  | 0.180  |
| Middle East/North Africa         | ACLP     | Cold War      | 0.059  | 0.158  |
| Middle East/North Africa         | ACLP     | post-Cold War | 12.622 | 15.185 |
| Middle East/North Africa         | ACLP     | Third wave    | -1.138 | -1.749 |
| Middle East/North Africa         | BMR      | all years     | 0.144  | 0.263  |
| Middle East/North Africa         | BMR      | Cold War      | 0.122  | 0.229  |
| Middle East/North Africa         | BMR      | post-Cold War | 12.125 | 14.075 |
| Middle East/North Africa         | BMR      | Third wave    | -0.611 | -1.013 |
| Middle East/North Africa         | PolityIV | all years     | -0.471 | -0.887 |
| Middle East/North Africa         | PolityIV | Cold War      | -0.614 | -1.303 |
| Middle East/North Africa         | PolityIV | post-Cold War | -0.618 | -0.858 |
| Middle East/North Africa         | PolityIV | Third wave    | -0.552 | -0.911 |
| Middle East/North Africa         | V-Dem    | all years     | -0.498 | -1.060 |
| Middle East/North Africa         | V-Dem    | Cold War      | 0.224  | 0.352  |
| Middle East/North Africa         | V-Dem    | post-Cold War | -1.230 | -2.389 |
| Middle East/North Africa         | V-Dem    | Third wave    | -0.952 | -2.081 |
| Global proportion of democracies | ACLP     | all years     | 0.146  | 0.927  |
| Global proportion of democracies | ACLP     | Cold War      | 1.576  | 1.580  |
| Global proportion of democracies | ACLP     | post-Cold War | -1.157 | -1.986 |
| Global proportion of democracies | ACLP     | Third wave    | 0.138  | 0.722  |
| Global proportion of democracies | BMR      | all years     | 0.137  | 0.814  |
| Global proportion of democracies | BMR      | Cold War      | 1.138  | 1.290  |
| Global proportion of democracies | BMR      | post-Cold War | -0.738 | -1.383 |
| Global proportion of democracies | BMR      | Third wave    | 0.111  | 0.589  |
| Global proportion of democracies | PolityIV | all years     | -0.220 | -1.597 |
| Global proportion of democracies | PolityIV | Cold War      | -0.158 | -0.144 |
| Global proportion of democracies | PolityIV | post-Cold War | -0.388 | -0.756 |
| Global proportion of democracies | PolityIV | Third wave    | -0.184 | -1.113 |
| Global proportion of democracies | V-Dem    | all years     | -0.390 | -2.348 |
| Global proportion of democracies | V-Dem    | Cold War      | 0.686  | 0.585  |
| Global proportion of democracies | V-Dem    | post-Cold War | -1.239 | -2.824 |
| Global proportion of democracies | V-Dem    | Third wave    | -0.224 | -1.330 |
| Aid received                     | ACLP     | all years     | 0.061  | 0.316  |
| Aid received                     | ACLP     | Cold War      | -0.018 | -0.038 |
| Aid received                     | ACLP     | post-Cold War | -0.036 | -0.172 |
| Aid received                     | ACLP     | Third wave    | -0.020 | -0.106 |
| Aid received                     | BMR      | all years     | 0.368  | 1.677  |
| Aid received                     | BMR      | Cold War      | 0.297  | 0.590  |
| Aid received                     | BMR      | post-Cold War | 0.302  | 1.181  |
| Aid received                     | BMR      | Third wave    | 0.269  | 1.173  |
| Aid received                     | PolityIV | all years     | 0.289  | 1.778  |
| Aid received                     | PolityIV | Cold War      | 0.233  | 0.682  |
| Aid received                     | PolityIV | post-Cold War | 0.384  | 1.826  |
| Aid received                     | PolityIV | Third wave    | 0.351  | 1.946  |

|                           |          |               |        |        |
|---------------------------|----------|---------------|--------|--------|
| Aid received              | V-Dem    | all years     | -0.069 | -0.674 |
| Aid received              | V-Dem    | Cold War      | -0.271 | -0.988 |
| Aid received              | V-Dem    | post-Cold War | 0.034  | 0.303  |
| Aid received              | V-Dem    | Third wave    | -0.011 | -0.100 |
| Neighborhood Polity score | ACLP     | all years     | 0.553  | 3.280  |
| Neighborhood Polity score | ACLP     | Cold War      | 0.480  | 2.028  |
| Neighborhood Polity score | ACLP     | post-Cold War | 0.616  | 2.059  |
| Neighborhood Polity score | ACLP     | Third wave    | 0.634  | 2.916  |
| Neighborhood Polity score | BMR      | all years     | 0.436  | 2.700  |
| Neighborhood Polity score | BMR      | Cold War      | 0.446  | 2.103  |
| Neighborhood Polity score | BMR      | post-Cold War | 0.369  | 1.065  |
| Neighborhood Polity score | BMR      | Third wave    | 0.393  | 1.785  |
| Neighborhood Polity score | PolityIV | all years     | 0.288  | 1.685  |
| Neighborhood Polity score | PolityIV | Cold War      | 0.779  | 2.377  |
| Neighborhood Polity score | PolityIV | post-Cold War | 0.138  | 0.456  |
| Neighborhood Polity score | PolityIV | Third wave    | 0.157  | 0.665  |
| Neighborhood Polity score | V-Dem    | all years     | 0.186  | 1.239  |
| Neighborhood Polity score | V-Dem    | Cold War      | 0.991  | 2.900  |
| Neighborhood Polity score | V-Dem    | post-Cold War | -0.058 | -0.231 |
| Neighborhood Polity score | V-Dem    | Third wave    | 0.131  | 0.793  |
| Neighborhood GDP pc       | ACLP     | all years     | 0.631  | 2.413  |
| Neighborhood GDP pc       | ACLP     | Cold War      | 0.616  | 1.835  |
| Neighborhood GDP pc       | ACLP     | post-Cold War | 0.596  | 1.171  |
| Neighborhood GDP pc       | ACLP     | Third wave    | 0.784  | 2.339  |
| Neighborhood GDP pc       | BMR      | all years     | 0.403  | 1.476  |
| Neighborhood GDP pc       | BMR      | Cold War      | 0.542  | 1.820  |
| Neighborhood GDP pc       | BMR      | post-Cold War | -0.036 | -0.067 |
| Neighborhood GDP pc       | BMR      | Third wave    | 0.323  | 0.876  |
| Neighborhood GDP pc       | PolityIV | all years     | 0.167  | 0.623  |
| Neighborhood GDP pc       | PolityIV | Cold War      | 0.490  | 1.232  |
| Neighborhood GDP pc       | PolityIV | post-Cold War | 0.255  | 0.566  |
| Neighborhood GDP pc       | PolityIV | Third wave    | 0.336  | 0.907  |
| Neighborhood GDP pc       | V-Dem    | all years     | -0.076 | -0.291 |
| Neighborhood GDP pc       | V-Dem    | Cold War      | 0.404  | 0.878  |
| Neighborhood GDP pc       | V-Dem    | post-Cold War | -0.023 | -0.069 |
| Neighborhood GDP pc       | V-Dem    | Third wave    | 0.014  | 0.050  |
| Neighborhood ILC          | ACLP     | all years     | 0.082  | 0.250  |
| Neighborhood ILC          | ACLP     | Cold War      | 0.128  | 0.300  |
| Neighborhood ILC          | ACLP     | post-Cold War | 0.173  | 0.307  |
| Neighborhood ILC          | ACLP     | Third wave    | -0.197 | -0.503 |
| Neighborhood ILC          | BMR      | all years     | -0.082 | -0.247 |
| Neighborhood ILC          | BMR      | Cold War      | -0.136 | -0.330 |
| Neighborhood ILC          | BMR      | post-Cold War | 0.282  | 0.474  |
| Neighborhood ILC          | BMR      | Third wave    | -0.259 | -0.689 |
| Neighborhood ILC          | PolityIV | all years     | 0.016  | 0.041  |
| Neighborhood ILC          | PolityIV | Cold War      | -0.221 | -0.408 |
| Neighborhood ILC          | PolityIV | post-Cold War | 0.374  | 0.608  |
| Neighborhood ILC          | PolityIV | Third wave    | 0.052  | 0.119  |
| Neighborhood ILC          | V-Dem    | all years     | 0.290  | 0.856  |
| Neighborhood ILC          | V-Dem    | Cold War      | -0.296 | -0.554 |
| Neighborhood ILC          | V-Dem    | post-Cold War | 0.668  | 1.437  |
| Neighborhood ILC          | V-Dem    | Third wave    | 0.460  | 1.213  |

Table A-19: Summary: Democratic Stability



## References

- Alesina, A., Devleeschauwer, A., Easterly, W., Kurlat, S., and Wacziarg, R. (2003). Fractionalization. *Journal of Economic Growth*, 8(June):155–194.
- Banks, A. S. (n.d.). Cross-national time-series data archive. databanks international. Online resource. Binghamton, NY: Databanks International.
- Bjørnskov, C. and Rode, M. (2019). Regime types and regime change: A new dataset. *Review of International Organizations*, Forthcoming.
- Boix, C., Miller, M., and Rosato, S. (2012). A complete data set of political regimes, 1800–2007. *Comparative Political Studies*, 46(12):1523–1554.
- Bolt, J., Inklaar, R., de Jong, H., and van Zanden, J. L. (2018). Rebasings maddison: new income comparisons and the shape of long-run economic development. *GGDC Research Memorandum*, 174.
- Cheibub, J., Gandhi, J., and Vreeland, J. (2010). Democracy and dictatorship revisited. *Public Choice*, 143(1–2):67–101.
- Chenoweth, E. and Stephan, M. J. (2011). *Why civil resistance works: The strategic logic of nonviolent conflict*. New York: Columbia University Press.
- Chiozza, G., Choung, J., Goemans, H., and Gleditsch, K. S. (2003). Archigos: A database of political leaders and transitions.
- Coppedge, M., Gerring, J., Knutsen, C. H., Lindberg, S. I., Teorell, J., Altman, D., Bernhard, M., Fish, S. M., Glynn, A., Hicken, A., Lührmann, A., Marquardt, K. L., McMann, K., Paxton, P., Pemstein, D., Seim, B., Sigman, R., Skaaning, S.-E., Staton, J., Wilson, S., Cornell, A., Gastaldi, L., Gjerløw, H., Ilchenko, N., Krusell, J., Maxwell, L., Mechkova, V., Medzihorsky, J., Pernes, J., Römer, J. v., Stepanova, N., Sundström, A., Tzelgov, E., Wang, Y.-t., Wig, T., and Ziblatt, D. (2019). V-dem [country-year/country-date] dataset v9.

- Geddes, B., Wright, J., and Frantz, E. (2014). Autocratic breakdown and regime transitions: A new data set. *Perspectives on Politics*, 12(2):313–331.
- Gleditsch, N. P., Wallensteen, P., Eriksson, M., Sollenberg, M., and Strand, H. (2002). Armed conflict 1946–2001: A new dataset. *Journal of Peace Research*, 39(5):615–637.
- Hadenius, A. and Teorell, J. (2005). Assessing alternative indices of democracy. Quality of Government Institute, University of Gothenburg.
- Heston, A., Summers, R., and Aten, B. (2011). Penn world table 7.0. Center for International Comparisons of Production, Income and Prices at the University of Pennsylvania.
- Honaker, J. and King, G. (2010). What to do about missing values in time-series cross-section data. *American Journal of Political Science*, 54(3):561–581.
- Honaker, J., King, G., and Blackwell, M. (2011). Amelia ii: A program for missing data. *Journal of Statistical Software*, 45:1–47.
- IHME (2010). Institute for health metrics and evaluation: Education data.
- Keefer, P. (2004). Dpi 2004, database of political institutions: Changes and variable definitions. [http://siteresources.worldbank.org/INTRES/Resources/DPI2004\\_variable-definitions.pdf](http://siteresources.worldbank.org/INTRES/Resources/DPI2004_variable-definitions.pdf). Washington, DC: Development Research Group, The World Bank.
- La Porta, R., Lopez-de Silanes, F., Shleifer, A., and Vishny, R. (1999). The quality of government. *Journal of Law, Economics and Organization*, 15(1):222–279.
- Marshall, M. G., Gurr, T. R., and Jaggers, K. (2018). Polity IV project: Political regime characteristics and transitions, 1800–2017. Center for Systemic Peace.
- Pettersson, T., Högbladh, S., and Öberg, M. (2019). Organized violence, 1989–2018 and peace agreements. *Journal of Peace Research*, page 0022343319856046.
- PRS Group (2010). International country risk guide methodology. Political Risk Group.

- Regan, P. M., Frank, R. W., and Clark, D. H. (2009). New datasets on political institutions and elections, 1972–2005. *Conflict Management and Peace Science*, 26(3):286–304.
- Ross, M. L. (2013). Oil and gas data, 1932-2011. Online resource.
- Solt, F. (2014). The standardized world income inequality database. Working paper. SWIID Version 5.0, October 2014.
- UNIDO (2011). United nations industrial development organization.
- Vanhanen, T. (2003). *Democratization : a comparative analysis of 170 countries / Tatu Vanhanen*. Routledge, London.
- Vogt, M., Bormann, N.-C., Rüeegger, S., Cederman, L.-E., Hunziker, P., and Girardin, L. (2015). Integrating data on ethnicity, geography, and conflict: The ethnic power relations data set family. *Journal of Conflict Resolution*, 59(7):1327–1342.
- Weidmann, N. B., Dorussen, H., and Gleditsch, K. S. (2010). The geography of the international system: The cshapes dataset. *International Interactions*, 36(1):86–106.
- Wig, T., Hegre, H., and Regan, P. M. (2015). Updated data on institutions and elections 1960–2012: presenting the iaep dataset version 2.0. *Research & Politics*, 2(2):2053168015579120.
- World Bank (2019). World development indicators 2019.
